# Supplementary material for: Transcriptomic Analysis on the Peel of UV-B-Exposed Peach Fruit Reveals an Upregulation of Phenolic- and UVR8-Related Pathways
Source: MDPI journal article supplement (doi:10.3390/plants12091818), 2023-04-28
Supplement: s1 [file s1]

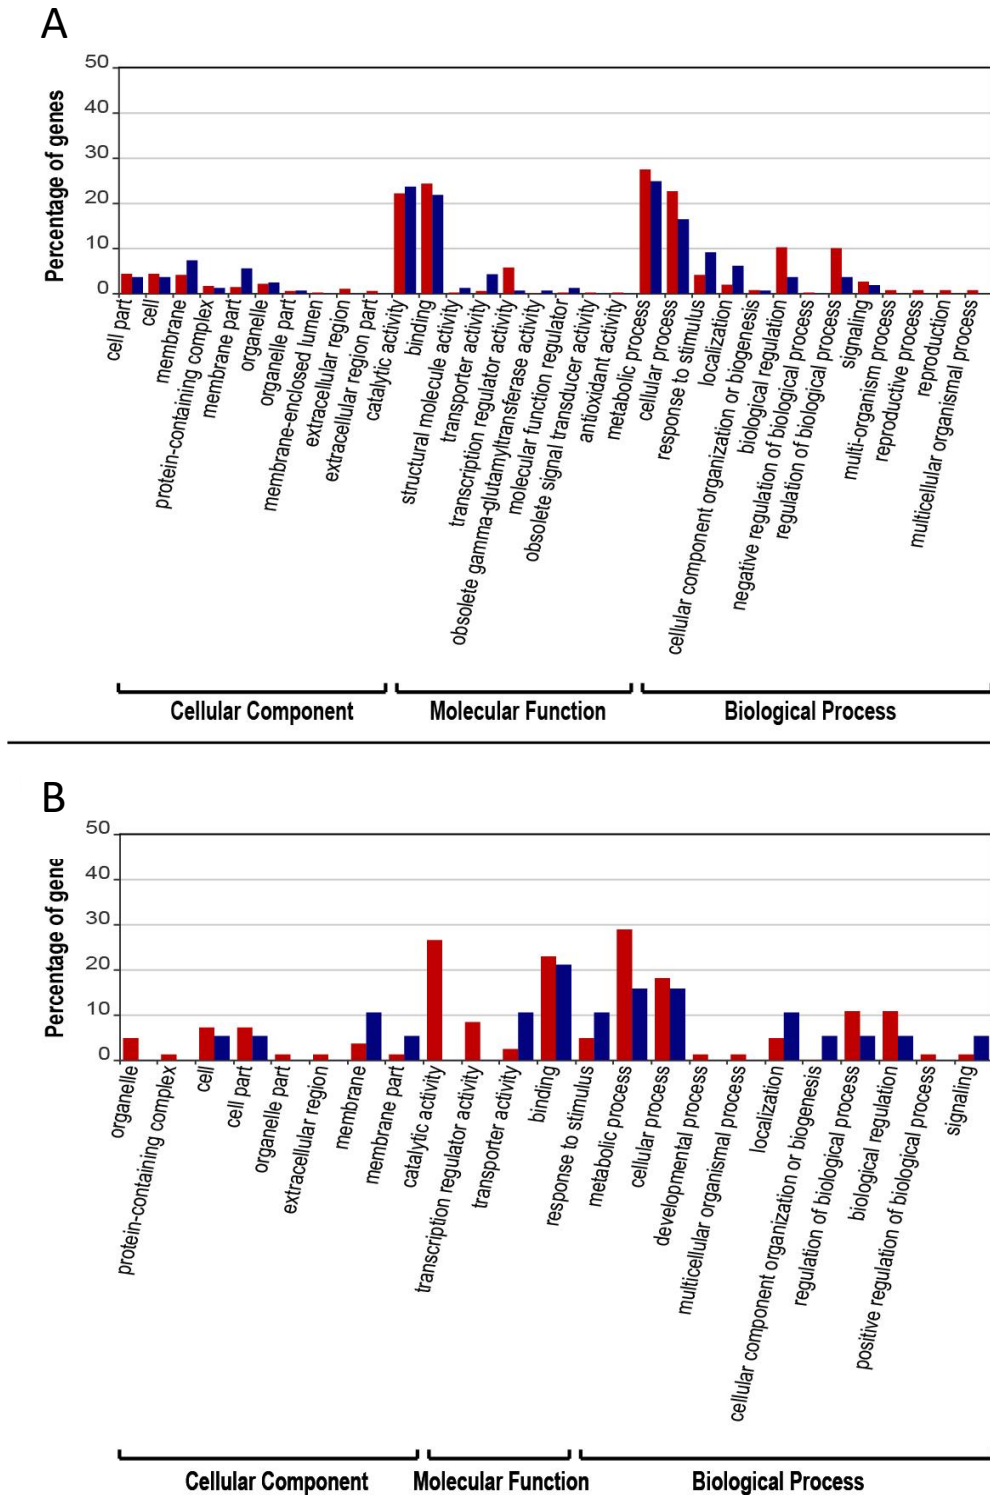

**Figure S1.** Distribution of GO terms for DEGs of peel of UV-B-treated peach fruit after (A) 1 h and (B) 3 h recovery time points. Over- expressed (red bar) and under-expressed (blue bar) GO terms are shown for each macro-category: “Cellular Component”, “Molecular Function”, and “Biological Process”.

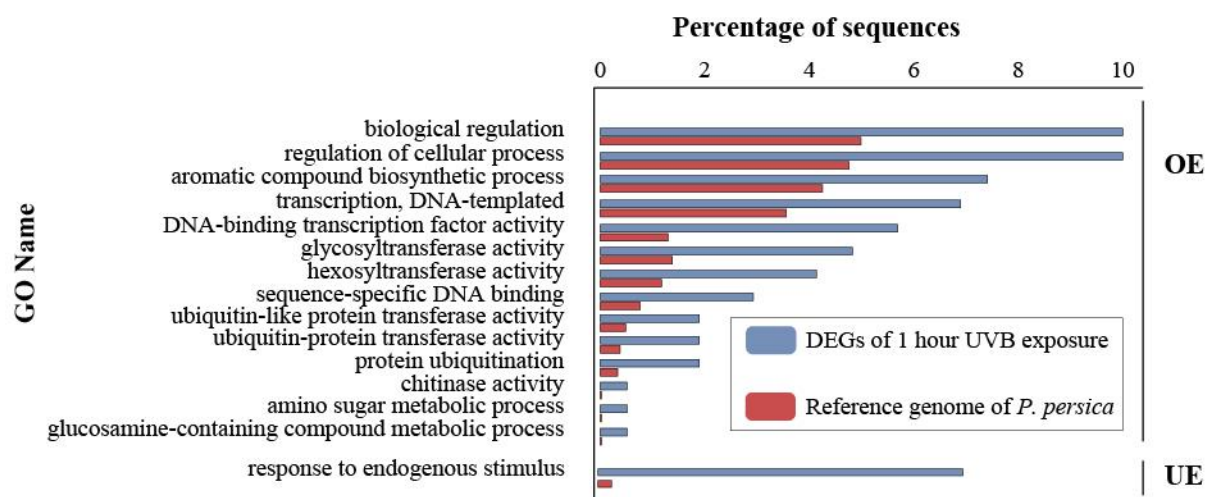

**Figure S2.** GO enrichment analysis for over (OE) and under (UE) expressed genes in the peel of UV-B-treated peach fruit after 1 h of recovery. Blue bars represent percentage of GO terms in DEGs. Red bars are the percentage of GO terms in reference *P. persica* transcriptome.

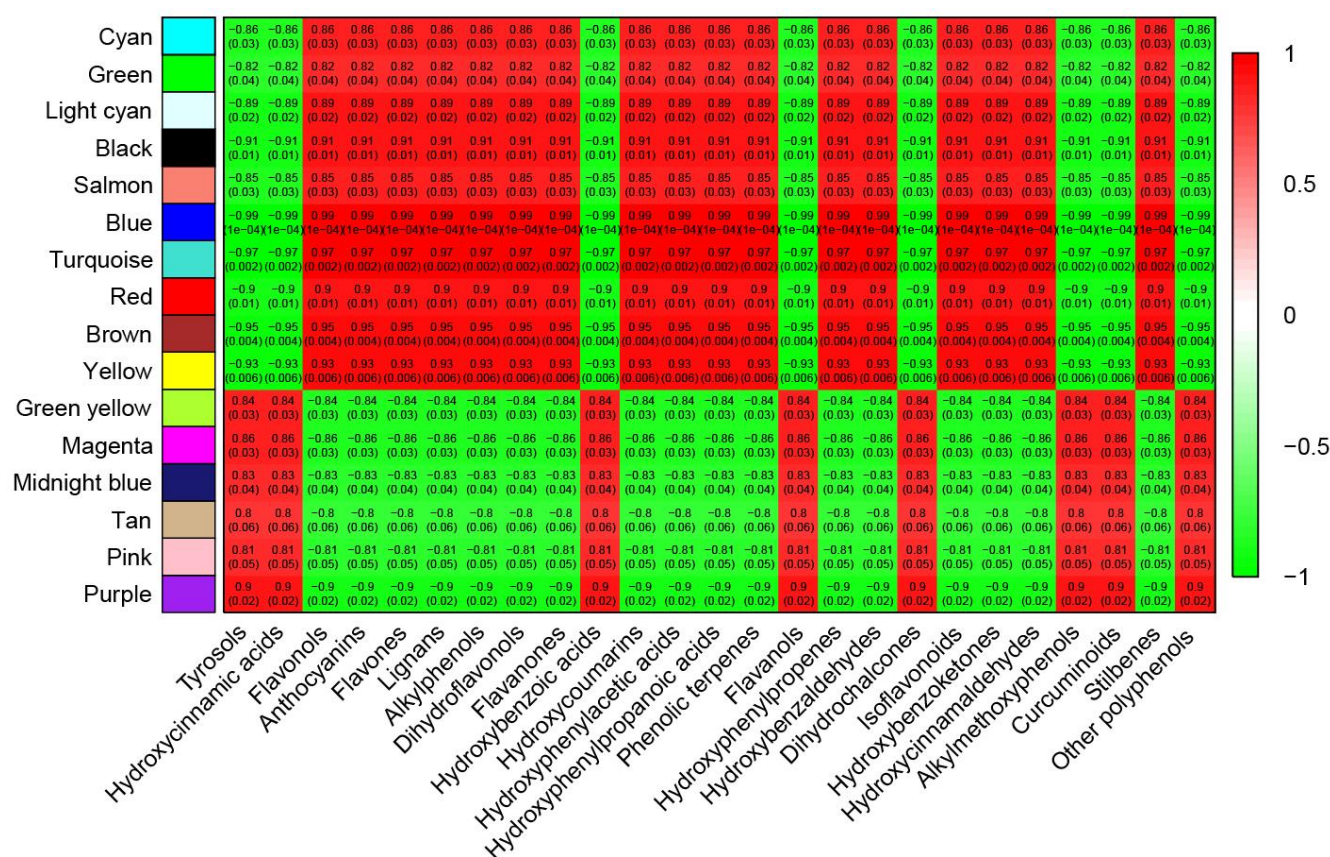

**Figure S3.** Gene network modules and biochemical trait correlation as calculated by WGNA. R<sup>2</sup> values and corresponding P-values are shown in each module-treatment comparison. Colour scale refers to R<sup>2</sup> and span from red (higher correlation) to green (lower correlation).
