# Supplementary material for: Transcriptomic Analysis on the Peel of UV-B-Exposed Peach Fruit Reveals an Upregulation of Phenolic- and UVR8-Related Pathways
Source: Plants (Basel). 2023 Apr 28;12(9):1818. doi: 10.3390/plants12091818 (PMC10180693; doi:10.3390/plants12091818)
Supplement: Supplementary file 1 [file plants-12-01818-s001.zip › Table S1.xlsx]

## Sheet: Foglio1
Table S1. Relative abundance of the individual phenolic subclasses (expressed as sum of integrated peak areas of all the phenolic compounds belonging to each subclass) detected in the peel of post-harvest UV-B-treated peach fruit (60 min UV-B treatment) after 36 h of recovery. Data represent the mean ± standard deviation (n = 5). Different letters indicate significant differences according to the…
Phenolic subclass	UV-B	CTR
Tyrosols	28900665 ± 8014932 b	70402116 ± 7784034 a
Hydroxycinnamic acids	34011404 ± 13251132	68722794 ± 29522542
Flavonols	48829623 ± 14521143	47154449 ± 21466541
Anthocyanins	19726542 ± 11120210 a	7784233 ± 1872636 b
Flavones	24954879 ± 8523754 a	12190282 ± 6019581 b
Lignans	15359839 ± 8094251	13032276 ± 8184734
Alkylphenols	13295433 ± 6261922	11092328 ± 4307212
Dihydroflavonols	15843574 ± 6240312 a	2383539 ± 498612 b
Flavanones	9462004 ± 1236903	8755937 ± 1456944
Hydroxybenzoic acids	3977977 ± 826401	4359630 ± 973824
Hydroxycoumarins	3780596 ± 450284	3027454 ± 650384
Hydroxyphenylacetic acids	1488356 ± 312874	1294688 ± 712453
Hydroxyphenylpropanoic acids	1959973 ± 583612	1907653 ± 438291
Phenolic terpenes	1415747 ± 501723	1232928 ± 421754
Flavanols	1498992 ± 498370	1881596 ± 765033
Hydroxyphenylpropenes	1856251 ± 483021	1299584 ± 387291
Hydroxybenzaldehydes	508544 ± 73123	461275 ± 97645
Dihydrochalcones	390404 ± 99038	566468 ± 126041
Isoflavonoids	1822144 ± 1034762	1586744 ± 683912
Hydroxybenzoketones	454772 ± 101283 a	266059 ± 72903 b
Hydroxycinnamaldehydes	193608 ± 99732	187348 ± 101384
Alkylmethoxyphenols	79050 ± 33012	169869 ± 84923
Curcuminoids	1474051 ± 785403	1592877 ± 873012
Stilbenes	3755604 ± 873923	3404730 ± 1203945
Other polyphenols	5393305 ± 1014932	5624224 ± 984033
