# Supplementary material for: Transcriptomic Analysis on the Peel of UV-B-Exposed Peach Fruit Reveals an Upregulation of Phenolic- and UVR8-Related Pathways
Source: Plants (Basel). 2023 Apr 28;12(9):1818. doi: 10.3390/plants12091818 (PMC10180693; doi:10.3390/plants12091818)
Supplement: Supplementary file 1 [file plants-12-01818-s001.zip › Table S2.xlsx]

## Sheet: Foglio1
	Table S2: List of differentially expressed genes in P. persica fruit peel exposed to UVB after 1 hour and three hours recovery
	Locus name	Transcript name	Peptide name	Gene symbol	Gene description	log FC	FDR	Over / Under expressed	time point	MapMan/Mercator Description
	Prupe.1G002900	Prupe.1G002900.1	Prupe.1G002900.1.p	ATCHS,CHS,TT4	Chalcone and stilbene synthase family protein	1.31576	0.0425863	Over	1 hour	Secondary metabolism.phenolics.flavonoid biosynthesis.chalcones.chalcone synthase activity.chalcone synthase (CHS)
	Prupe.1G015200	Prupe.1G015200.1	Prupe.1G015200.1.p		Pre-rRNA-processing protein TSR2, conserved region	1.34166	0.00328255	Over	1 hour	not assigned.not annotated
	Prupe.1G020800	Prupe.1G020800.1	Prupe.1G020800.1.p			2.67505	0.000414838	Over	1 hour	Phytohormone action.signalling peptides.CRP (cysteine-rich-peptide) category.EPF/EPFL-peptide activity.EPF/EPFL-precursor polypeptide
	Prupe.1G021800	Prupe.1G021800.1	Prupe.1G021800.1.p	ELIP,ELIP1	Chlorophyll A-B binding family protein	1.28229	0.00843128	Over	1 hour	Photosynthesis.photophosphorylation.photosystem II.LHC-related protein groups.three-helix LHC-related protein group.protein (ELIP)
	Prupe.1G023400	Prupe.1G023400.1	Prupe.1G023400.1.p		ATPase E1-E2 type family protein / haloacid dehalogenase-like hydrolase family protein	1.49184	0.0207174	Over	1 hour	Solute transport.primary active transport.P-type ATPase superfamily.P2 family.P2B-type calcium cation-transporting ATPase (ACA)
	Prupe.1G025600	Prupe.1G025600.1	Prupe.1G025600.1.p	KCS2	3-ketoacyl-CoA synthase 2	1.48469	5.69623e-13	Over	1 hour	Lipid metabolism.fatty acid biosynthesis.endoplasmic reticulum-localized fatty acid elongase (FAE) system.fatty acid elongation complex.3-ketoacyl-CoA synthase (KCS)
	Prupe.1G026400	Prupe.1G026400.1	Prupe.1G026400.1.p	CIPK4,SnRK3.3	CBL-interacting protein kinase 4	1.09567	3.79464e-14	Over	1 hour	Protein modification.phosphorylation.CAMK protein kinase superfamily.SNF1-related protein kinase (SnRK3)
	Prupe.1G034700	Prupe.1G034700.1	Prupe.1G034700.1.p			1.1183	5.02084e-15	Over	1 hour	not assigned.not annotated
	Prupe.1G037100	Prupe.1G037100.1	Prupe.1G037100.1.p		Uncharacterised protein family (UPF0497)	1.20155	0.00459374	Over	1 hour	not assigned.annotated
	Prupe.1G045600	Prupe.1G045600.1	Prupe.1G045600.1.p	ATPTR3,PTR3	peptide transporter 3	1.07716	0.0334366	Over	1 hour	Solute transport.carrier-mediated transport.MFS superfamily.anion transporter (NRT1/PTR)
	Prupe.1G047600	Prupe.1G047600.4	Prupe.1G047600.4.p		TLD-domain containing nucleolar protein	1.01724	0.0426201	Over	1 hour	not assigned.not annotated
	Prupe.1G071400	Prupe.1G071400.1	Prupe.1G071400.1.p	ATWRKY11,WRKY11	WRKY DNA-binding protein 11	1.33275	1.22085e-11	Over	1 hour	RNA biosynthesis.transcriptional regulation.transcription factor (WRKY)
	Prupe.1G076500	Prupe.1G076500.1	Prupe.1G076500.1.p	ELO1	Paxneb protein-related	1.23852	0.0334359	Over	1 hour	RNA biosynthesis.RNA polymerase II-dependent transcription.transcription elongation.ELONGATOR transcription elongation complex.component ELP4
	Prupe.1G080600	Prupe.1G080600.1	Prupe.1G080600.1.p	ATCHITIV,ATEP3,CHIV,EP3	homolog of carrot EP3-3 chitinase	1.11155	0.000955183	Over	1 hour	not assigned.annotated
	Prupe.1G083000	Prupe.1G083000.2	Prupe.1G083000.2.p		lectin protein kinase family protein	1.15676	0.0311007	Over	1 hour	Protein modification.phosphorylation.TKL protein kinase superfamily.receptor-like protein kinase (RLCK-Os)
	Prupe.1G087800	Prupe.1G087800.1	Prupe.1G087800.1.p			2.10039	7.87561e-07	Over	1 hour	not assigned.not annotated
	Prupe.1G088900	Prupe.1G088900.1	Prupe.1G088900.1.p	XTH23,XTR6	xyloglucan endotransglycosylase 6	1.46219	0.0109026	Over	1 hour	Enzyme classification.EC_2 transferases.EC_2.4 glycosyltransferase
	Prupe.1G095900	Prupe.1G095900.1	Prupe.1G095900.1.p			1.26778	0.00705029	Over	1 hour	not assigned.not annotated
	Prupe.1G098500	Prupe.1G098500.1	Prupe.1G098500.1.p			1.0375	0.0449055	Over	1 hour	not assigned.not annotated
	Prupe.1G099000	Prupe.1G099000.1	Prupe.1G099000.1.p	GAE1	UDP-D-glucuronate 4-epimerase 1	1.3312	9.56456e-05	Over	1 hour	Carbohydrate metabolism.nucleotide sugar biosynthesis.UDP-D-galacturonic acid biosynthesis.UDP-D-glucuronic acid 4-epimerase
	Prupe.1G115600	Prupe.1G115600.1	Prupe.1G115600.1.p	ATCP1,CP1	Ca2+-binding protein 1	1.63892	1.60631e-10	Over	1 hour	not assigned.annotated
	Prupe.1G116300	Prupe.1G116300.1	Prupe.1G116300.1.p		GDSL-like Lipase/Acylhydrolase superfamily protein	4.18246	0.00364072	Over	1 hour	not assigned.annotated
	Prupe.1G117400	Prupe.1G117400.1	Prupe.1G117400.1.p			1.41057	0.00343083	Over	1 hour	not assigned.not annotated
	Prupe.1G123100	Prupe.1G123100.1	Prupe.1G123100.1.p	ATBXL1,BXL1	beta-xylosidase 1	1.63705	0.0315155	Over	1 hour	Cell wall organisation.pectin.rhamnogalacturonan I.modification and degradation.alpha-L-arabinofuranosidase activities.bifunctional alpha-L-arabinofuranosidase and beta-D-xylosidase (BXL)
	Prupe.1G124000	Prupe.1G124000.1	Prupe.1G124000.1.p	ATL2,TL2	TOXICOS EN LEVADURA 2	1.081	3.27851e-09	Over	1 hour	Protein homeostasis.ubiquitin-proteasome system.ubiquitin-fold protein conjugation.ubiquitin conjugation (ubiquitylation).ubiquitin-ligase E3 activities.RING-domain E3 ligase activities.RING-H2-class E3 ligase
	Prupe.1G125700	Prupe.1G125700.4	Prupe.1G125700.4.p	FRS11	FAR1-related sequence 11	1.24432	0.0300066	Over	1 hour	RNA biosynthesis.transcriptional regulation.transcription factor (FAR1)
	Prupe.1G127200	Prupe.1G127200.1	Prupe.1G127200.1.p	MLP423	MLP-like protein 423	1.25602	0.0153034	Over	1 hour	not assigned.annotated
	Prupe.1G145900	Prupe.1G145900.1	Prupe.1G145900.1.p			1.27561	7.91038e-13	Over	1 hour	not assigned.not annotated
	Prupe.1G169100	Prupe.1G169100.1	Prupe.1G169100.1.p	IAGLU	indole-3-acetate beta-D-glucosyltransferase	1.35341	0.0136405	Over	1 hour	Enzyme classification.EC_2 transferases.EC_2.4 glycosyltransferase
	Prupe.1G181000	Prupe.1G181000.1	Prupe.1G181000.1.p		UDP-Glycosyltransferase superfamily protein	1.8751	8.74284e-06	Over	1 hour	Enzyme classification.EC_2 transferases.EC_2.4 glycosyltransferase
	Prupe.1G181800	Prupe.1G181800.1	Prupe.1G181800.1.p	DGL	alpha/beta-Hydrolases superfamily protein	4.15322	0.000565759	Over	1 hour	Lipid metabolism.lipid degradation.phospholipase activities.phospholipase A1 activities.phospholipase A1 (PC-PLA1)
	Prupe.1G195600	Prupe.1G195600.1	Prupe.1G195600.1.p		Far-red impaired responsive (FAR1) family protein	8.20602	0.00577623	Over	1 hour	RNA biosynthesis.transcriptional regulation.transcription factor (FAR1)
	Prupe.1G197900	Prupe.1G197900.5	Prupe.1G197900.5.p	FPA	RNA binding	1.34491	0.00180717	Over	1 hour	not assigned.annotated
	Prupe.1G202300	Prupe.1G202300.1	Prupe.1G202300.1.p			1.02768	1.01679e-06	Over	1 hour	not assigned.not annotated
	Prupe.1G202400	Prupe.1G202400.1	Prupe.1G202400.1.p			1.13461	0.000235222	Over	1 hour	not assigned.not annotated
	Prupe.1G204000	Prupe.1G204000.1	Prupe.1G204000.1.p	ATCHITIV,ATEP3,CHIV,EP3	homolog of carrot EP3-3 chitinase	2.51256	7.28587e-05	Over	1 hour	not assigned.annotated
	Prupe.1G204700	Prupe.1G204700.1	Prupe.1G204700.1.p	ATCHITIV,ATEP3,CHIV,EP3	homolog of carrot EP3-3 chitinase	1.39988	0.0382755	Over	1 hour	not assigned.annotated
	Prupe.1G208500	Prupe.1G208500.1	Prupe.1G208500.1.p	HYH	HY5-homolog	1.27903	0.000610021	Over	1 hour	External stimuli response.light.UV-B light.transcriptional regulator (HY5)/Trascriptional regulation
	Prupe.1G209900	Prupe.1G209900.3	Prupe.1G209900.3.p			9.04538	0.0198355	Over	1 hour	Cell cycle organisation.organellar DNA replication.DNA recombination.recombination mediator (RAD52)
	Prupe.1G212500	Prupe.1G212500.1	Prupe.1G212500.1.p		ARM repeat superfamily protein	1.04597	4.49989e-07	Over	1 hour	Protein homeostasis.ubiquitin-proteasome system.ubiquitin-fold protein conjugation.ubiquitin conjugation (ubiquitylation).ubiquitin-ligase E3 activities.U-Box E3 ligase activities.E3 ubiquitin ligase (PUB)
	Prupe.1G217100	Prupe.1G217100.3	Prupe.1G217100.3.p			1.02475	0.0449055	Over	1 hour	Secondary metabolism.terpenoids.carotenoid biosynthesis.xanthophylls.neoxanthin biosynthesis cofactor (NXD1)/Phytohormone action.abscisic acid.biosynthesis.neoxanthin biosynthesis cofactor (NXD1)
	Prupe.1G223500	Prupe.1G223500.6	Prupe.1G223500.6.p		Squamosa promoter-binding protein-like (SBP domain) transcription factor family protein	1.30971	0.00025934	Over	1 hour	RNA biosynthesis.transcriptional regulation.transcription factor (SBP)
	Prupe.1G225600	Prupe.1G225600.1	Prupe.1G225600.1.p		chaperone protein dnaJ-related	1.52635	3.55526e-58	Over	1 hour	not assigned.not annotated
	Prupe.1G225800	Prupe.1G225800.1	Prupe.1G225800.1.p		HCP-like superfamily protein with MYND-type zinc finger	1.41688	2.49674e-15	Over	1 hour	not assigned.annotated
	Prupe.1G234400	Prupe.1G234400.3	Prupe.1G234400.3.p		Protein phosphatase 2A regulatory B subunit family protein	1.06066	0.00145786	Over	1 hour	Protein modification.phosphorylation.serine/threonine protein phosphatase superfamily.PPP Fe-Zn-dependent phosphatase families.PP2A-class phosphatase complexes.regulatory component B1
	Prupe.1G237100	Prupe.1G237100.1	Prupe.1G237100.1.p		HXXXD-type acyl-transferase family protein	1.73855	8.65834e-05	Over	1 hour	Enzyme classification.EC_2 transferases.EC_2.3 acyltransferase
	Prupe.1G237400	Prupe.1G237400.1	Prupe.1G237400.1.p		alpha/beta-Hydrolases superfamily protein	1.41792	8.09117e-10	Over	1 hour	not assigned.annotated
	Prupe.1G238800	Prupe.1G238800.1	Prupe.1G238800.1.p	NOI	RPM1-interacting protein 4 (RIN4) family protein	2.20856	0.0134976	Over	1 hour	not assigned.not annotated
	Prupe.1G243100	Prupe.1G243100.1	Prupe.1G243100.1.p			1.02236	0.000844627	Over	1 hour	Cell cycle organisation.cell cycle control.cyclin-dependent regulation.cyclin-dependent protein kinase inhibitor activities.inhibitor (SIM)
	Prupe.1G253100	Prupe.1G253100.1	Prupe.1G253100.1.p		Protein of unknown function (DUF1645)	2.17446	1.2933e-09	Over	1 hour	not assigned.not annotated
	Prupe.1G255000	Prupe.1G255000.1	Prupe.1G255000.1.p		ARM repeat superfamily protein	2.51457	6.66566e-14	Over	1 hour	Protein homeostasis.ubiquitin-proteasome system.ubiquitin-fold protein conjugation.ubiquitin conjugation (ubiquitylation).ubiquitin-ligase E3 activities.U-Box E3 ligase activities.E3 ubiquitin ligase (PUB)
	Prupe.1G261000	Prupe.1G261000.1	Prupe.1G261000.1.p	MMP	matrix metalloproteinase	1.15256	0.00153119	Over	1 hour	Protein homeostasis.proteolysis.metallopeptidase activities.M10-class metalloprotease (Matrixin)
	Prupe.1G261100	Prupe.1G261100.1	Prupe.1G261100.1.p			1.98573	7.72393e-06	Over	1 hour	not assigned.not annotated
	Prupe.1G261500	Prupe.1G261500.1	Prupe.1G261500.1.p	ARR3	response regulator 3	1.14315	0.0010337	Over	1 hour	Phytohormone action.cytokinin.perception and signal transduction.A-type ARR response negative regulator
	Prupe.1G282600	Prupe.1G282600.1	Prupe.1G282600.1.p		RING/U-box superfamily protein	1.20162	0.0334359	Over	1 hour	Protein homeostasis.ubiquitin-proteasome system.ubiquitin-fold protein conjugation.ubiquitin conjugation (ubiquitylation).ubiquitin-ligase E3 activities.RING-domain E3 ligase activities.RING-HC-class E3 ligase
	Prupe.1G288000	Prupe.1G288000.2	Prupe.1G288000.2.p	AFP2	ABI five binding protein 2	1.93781	0.000167398	Over	1 hour	not assigned.not annotated
	Prupe.1G294500	Prupe.1G294500.1	Prupe.1G294500.1.p			1.59017	0.00249187	Over	1 hour	not assigned.annotated
	Prupe.1G299200	Prupe.1G299200.1	Prupe.1G299200.1.p		F-box/RNI-like superfamily protein	1.40809	0.00173729	Over	1 hour	Protein homeostasis.ubiquitin-proteasome system.ubiquitin-fold protein conjugation.Cullin-based ubiquitylation complexes.SKP1-CUL1-FBX (SCF) E3 ligase complexes.F-BOX substrate adaptor components.component FBX
	Prupe.1G300000	Prupe.1G300000.1	Prupe.1G300000.1.p		Protein of unknown function (DUF1262)	1.23548	2.39948e-09	Over	1 hour	not assigned.not annotated
	Prupe.1G300100	Prupe.1G300100.1	Prupe.1G300100.1.p		Protein of unknown function (DUF1262)	1.1638	0.000674815	Over	1 hour	not assigned.not annotated
	Prupe.1G300200	Prupe.1G300200.1	Prupe.1G300200.1.p		Protein of unknown function (DUF1262)	1.68384	4.23234e-09	Over	1 hour	not assigned.not annotated
	Prupe.1G303000	Prupe.1G303000.1	Prupe.1G303000.1.p	ATNUDT1,ATNUDX1,NUDX1	nudix hydrolase 1	3.27283	0.00698018	Over	1 hour	Coenzyme metabolism.tetrahydrofolate biosynthesis.pterin biosynthesis.Nudix-type hydrolase
	Prupe.1G303500	Prupe.1G303500.1	Prupe.1G303500.1.p	IDA	Putative membrane lipoprotein	1.28515	0.0197178	Over	1 hour	Phytohormone action.signalling peptides.NCRP (non-cysteine-rich-peptide) category.IDL-peptide activity.IDA/IDL-precursor polypeptide
	Prupe.1G305900	Prupe.1G305900.1	Prupe.1G305900.1.p	EDF1,TEM1	AP2/B3 transcription factor family protein	1.05038	3.60574e-06	Over	1 hour	RNA biosynthesis.transcriptional regulation.B3 transcription factor superfamily.transcription factor (RAV/NGATHA)/RNA biosynthesis.transcriptional regulation.AP2/ERF transcription factor superfamily.transcription factor (AP2-RAV)
	Prupe.1G306300	Prupe.1G306300.1	Prupe.1G306300.1.p		myb-like transcription factor family protein	1.59936	7.48389e-08	Over	1 hour	RNA biosynthesis.transcriptional regulation.MYB transcription factor superfamily.transcription factor (GARP)
	Prupe.1G309400	Prupe.1G309400.5	Prupe.1G309400.5.p	RAD23-3,RAD23C	Rad23 UV excision repair protein family	1.28647	0.00648691	Over	1 hour	Protein homeostasis.ubiquitin-proteasome system.ER-associated protein degradation (ERAD).delivery to proteasome.shuttle protein (RAD23)
	Prupe.1G311500	Prupe.1G311500.1	Prupe.1G311500.1.p			1.20645	0.001445	Over	1 hour	not assigned.not annotated
	Prupe.1G314600	Prupe.1G314600.1	Prupe.1G314600.1.p		Core-2/I-branching beta-1,6-N-acetylglucosaminyltransferase family protein	1.78551	2.44839e-07	Over	1 hour	not assigned.annotated
	Prupe.1G315200	Prupe.1G315200.1	Prupe.1G315200.1.p		Protein kinase superfamily protein	1.17588	0.000456271	Over	1 hour	not assigned.not annotated
	Prupe.1G315900	Prupe.1G315900.3	Prupe.1G315900.3.p		Protein kinase superfamily protein	1.4936	4.06763e-05	Over	1 hour	Protein modification.phosphorylation.TKL protein kinase superfamily.protein kinase (LRK10-1-like)
	Prupe.1G316700	Prupe.1G316700.1	Prupe.1G316700.1.p			1.07926	0.0343667	Over	1 hour	not assigned.not annotated
	Prupe.1G317600	Prupe.1G317600.1	Prupe.1G317600.1.p			2.09476	9.94046e-05	Over	1 hour	not assigned.not annotated
	Prupe.1G319000	Prupe.1G319000.1	Prupe.1G319000.1.p		Protein kinase superfamily protein	2.44431	1.23046e-05	Over	1 hour	not assigned.not annotated
	Prupe.1G319100	Prupe.1G319100.1	Prupe.1G319100.1.p		Protein kinase superfamily protein	1.63046	0.0334069	Over	1 hour	not assigned.not annotated
	Prupe.1G321600	Prupe.1G321600.1	Prupe.1G321600.1.p			1.90112	1.20303e-07	Over	1 hour	not assigned.not annotated
	Prupe.1G323400	Prupe.1G323400.1	Prupe.1G323400.1.p	ATMYB4,MYB4	myb domain protein 4	1.7571	0.0100556	Over	1 hour	RNA biosynthesis.transcriptional regulation.MYB transcription factor superfamily.transcription factor (MYB)
	Prupe.1G332900	Prupe.1G332900.1	Prupe.1G332900.1.p			2.17586	4.63858e-19	Over	1 hour	not assigned.not annotated
	Prupe.1G336200	Prupe.1G336200.1	Prupe.1G336200.1.p		ARM repeat superfamily protein	2.24671	0.000146022	Over	1 hour	not assigned.annotated
	Prupe.1G339500	Prupe.1G339500.1	Prupe.1G339500.1.p			1.97871	0.000335766	Over	1 hour	not assigned.not annotated
	Prupe.1G343300	Prupe.1G343300.1	Prupe.1G343300.1.p	ATPSKR1,PSKR1	phytosulfokin receptor 1	1.35481	0.0365414	Over	1 hour	Phytohormone action.signalling peptides.NCRP (non-cysteine-rich-peptide) category.phytosulfokine activity.pythosulfokine peptide receptor (PSKR)
	Prupe.1G344800	Prupe.1G344800.1	Prupe.1G344800.1.p	BPS1	Protein of unknown function (DUF793)	1.03671	0.00240336	Over	1 hour	not assigned.annotated
	Prupe.1G347600	Prupe.1G347600.1	Prupe.1G347600.1.p			1.10016	9.15612e-09	Over	1 hour	not assigned.not annotated
	Prupe.1G364400	Prupe.1G364400.1	Prupe.1G364400.1.p		Chaperone DnaJ-domain superfamily protein	2.08381	1.34101e-13	Over	1 hour	not assigned.annotated
	Prupe.1G383900	Prupe.1G383900.1	Prupe.1G383900.1.p	HOS3-1	GNS1/SUR4 membrane protein family	1.71026	1.48581e-21	Over	1 hour	not assigned.annotated
	Prupe.1G384100	Prupe.1G384100.1	Prupe.1G384100.1.p	ATGATL1,GATL1,GLZ1,PARVUS	Nucleotide-diphospho-sugar transferases superfamily protein	1.36288	0.000277169	Over	1 hour	Cell wall organisation.hemicellulose.xylan.biosynthesis.galacturonosyltransferase
	Prupe.1G384200	Prupe.1G384200.1	Prupe.1G384200.1.p			1.72793	3.79487e-05	Over	1 hour	not assigned.not annotated
	Prupe.1G385900	Prupe.1G385900.1	Prupe.1G385900.1.p		Uncharacterised protein family (UPF0114)	2.14025	1.25252e-06	Over	1 hour	not assigned.not annotated
	Prupe.1G386200	Prupe.1G386200.1	Prupe.1G386200.1.p			1.38381	7.72393e-06	Over	1 hour	not assigned.not annotated
	Prupe.1G390900	Prupe.1G390900.1	Prupe.1G390900.1.p		Plant protein of unknown function (DUF868)	1.07972	2.87943e-06	Over	1 hour	not assigned.not annotated
	Prupe.1G393000	Prupe.1G393000.1	Prupe.1G393000.1.p	ATWRKY40,WRKY40	WRKY DNA-binding protein 40	1.45633	0.000667663	Over	1 hour	RNA biosynthesis.transcriptional regulation.transcription factor (WRKY)
	Prupe.1G393400	Prupe.1G393400.1	Prupe.1G393400.1.p	ATCM2,CM2	chorismate mutase 2	1.23903	0.00159368	Over	1 hour	Amino acid metabolism.biosynthesis.shikimate family.phenylalanine and tyrosine.chorismate mutase
	Prupe.1G393400	Prupe.1G393400.4	Prupe.1G393400.4.p	ATCM2,CM2	chorismate mutase 2	2.2365	0.000913176	Over	1 hour	Amino acid metabolism.biosynthesis.shikimate family.phenylalanine and tyrosine.chorismate mutase
	Prupe.1G409800	Prupe.1G409800.1	Prupe.1G409800.1.p	EDA39	calmodulin-binding family protein	1.33456	2.94522e-06	Over	1 hour	not assigned.annotated
	Prupe.1G411300	Prupe.1G411300.1	Prupe.1G411300.1.p		leucine-rich repeat transmembrane protein kinase family protein	1.16487	0.000334054	Over	1 hour	Protein modification.phosphorylation.TKL protein kinase superfamily.protein kinase (LRR-III)
	Prupe.1G411400	Prupe.1G411400.1	Prupe.1G411400.1.p			1.03407	0.000807811	Over	1 hour	not assigned.not annotated
	Prupe.1G415400	Prupe.1G415400.5	Prupe.1G415400.5.p		Core-2/I-branching beta-1,6-N-acetylglucosaminyltransferase family protein	1.66943	0.0186371	Over	1 hour	not assigned.annotated
	Prupe.1G420800	Prupe.1G420800.1	Prupe.1G420800.1.p		Uncharacterised conserved protein UCP031279	1.91096	0.000193847	Over	1 hour	not assigned.not annotated
	Prupe.1G422400	Prupe.1G422400.1	Prupe.1G422400.1.p	ZCF37	ZCF37	1.77907	2.06203e-18	Over	1 hour	not assigned.not annotated
	Prupe.1G424300	Prupe.1G424300.1	Prupe.1G424300.1.p	STZ,ZAT10	salt tolerance zinc finger	1.41595	4.34082e-11	Over	1 hour	RNA biosynthesis.transcriptional regulation.transcription factor (C2H2-ZF)
	Prupe.1G425900	Prupe.1G425900.1	Prupe.1G425900.1.p		Syntaxin/t-SNARE family protein	1.37057	2.60706e-11	Over	1 hour	not assigned.not annotated
	Prupe.1G426200	Prupe.1G426200.1	Prupe.1G426200.1.p	AWI31,VEP1	NAD(P)-binding Rossmann-fold superfamily protein	1.23633	0.00333725	Over	1 hour	not assigned.annotated
	Prupe.1G426300	Prupe.1G426300.1	Prupe.1G426300.1.p	AWI31,VEP1	NAD(P)-binding Rossmann-fold superfamily protein	2.18668	0.0194788	Over	1 hour	not assigned.annotated
	Prupe.1G431800	Prupe.1G431800.1	Prupe.1G431800.1.p		SPla/RYanodine receptor (SPRY) domain-containing protein	1.1013	0.000222969	Over	1 hour	not assigned.not annotated
	Prupe.1G437700	Prupe.1G437700.1	Prupe.1G437700.1.p			1.51227	0.000276449	Over	1 hour	not assigned.not annotated
	Prupe.1G457600	Prupe.1G457600.1	Prupe.1G457600.1.p		SWAP (Suppressor-of-White-APricot)/surp RNA-binding domain-containing protein	1.6707	0.00491013	Over	1 hour	not assigned.not annotated
	Prupe.1G459100	Prupe.1G459100.1	Prupe.1G459100.1.p	ATWRKY11,WRKY11	WRKY DNA-binding protein 11	1.39272	6.45387e-09	Over	1 hour	RNA biosynthesis.transcriptional regulation.transcription factor (WRKY)
	Prupe.1G459600	Prupe.1G459600.1	Prupe.1G459600.1.p			1.86603	6.39602e-08	Over	1 hour	not assigned.not annotated
	Prupe.1G460000	Prupe.1G460000.1	Prupe.1G460000.1.p			3.13349	1.90338e-08	Over	1 hour	not assigned.not annotated
	Prupe.1G475100	Prupe.1G475100.1	Prupe.1G475100.1.p	ATRD22,RD22	BURP domain-containing protein	1.24698	0.0426467	Over	1 hour	not assigned.annotated
	Prupe.1G481200	Prupe.1G481200.1	Prupe.1G481200.1.p			3.48054	0.0128284	Over	1 hour	not assigned.not annotated
	Prupe.1G486000	Prupe.1G486000.1	Prupe.1G486000.1.p			3.16954	6.11429e-06	Over	1 hour	not assigned.not annotated
	Prupe.1G486800	Prupe.1G486800.1	Prupe.1G486800.1.p			1.92427	1.42713e-39	Over	1 hour	not assigned.not annotated
	Prupe.1G490800	Prupe.1G490800.1	Prupe.1G490800.1.p		Protein kinase superfamily protein	1.5598	9.06969e-05	Over	1 hour	Protein modification.phosphorylation.TKL protein kinase superfamily.protein kinase (RKF3)
	Prupe.1G497900	Prupe.1G497900.1	Prupe.1G497900.1.p		GDSL-like Lipase/Acylhydrolase superfamily protein	1.33384	0.00167335	Over	1 hour	not assigned.annotated
	Prupe.1G501600	Prupe.1G501600.3	Prupe.1G501600.3.p			1.29	0.00694072	Over	1 hour	not assigned.not annotated
	Prupe.1G502800	Prupe.1G502800.1	Prupe.1G502800.1.p	ATFLS1,FLS,FLS1	flavonol synthase 1	1.43503	0.0415772	Over	1 hour	Secondary metabolism.phenolics.flavonoid biosynthesis.flavonols.flavonol synthase
	Prupe.1G509400	Prupe.1G509400.1	Prupe.1G509400.1.p			2.07368	6.9707e-09	Over	1 hour	not assigned.not annotated
	Prupe.1G509800	Prupe.1G509800.1	Prupe.1G509800.1.p			2.69573	4.72266e-12	Over	1 hour	not assigned.not annotated
	Prupe.1G512900	Prupe.1G512900.1	Prupe.1G512900.1.p			1.43766	0.00749816	Over	1 hour	not assigned.not annotated
	Prupe.1G520600	Prupe.1G520600.1	Prupe.1G520600.1.p	EXO	Phosphate-responsive 1 family protein	2.03253	1.62229e-06	Over	1 hour	not assigned.annotated
	Prupe.1G520700	Prupe.1G520700.1	Prupe.1G520700.1.p	EXO	Phosphate-responsive 1 family protein	2.57634	1.2251e-05	Over	1 hour	not assigned.annotated
	Prupe.1G520800	Prupe.1G520800.1	Prupe.1G520800.1.p	EXO	Phosphate-responsive 1 family protein	2.12891	4.72116e-06	Over	1 hour	not assigned.annotated
	Prupe.1G522800	Prupe.1G522800.1	Prupe.1G522800.1.p			1.2968	0.0120741	Over	1 hour	not assigned.not annotated
	Prupe.1G524700	Prupe.1G524700.1	Prupe.1G524700.1.p		ENTH/ANTH/VHS superfamily protein	2.67753	3.66816e-14	Over	1 hour	not assigned.annotated
	Prupe.1G529200	Prupe.1G529200.1	Prupe.1G529200.1.p	ATPUMP5,DIC1,UCP5	uncoupling protein 5	1.18956	0.00113447	Over	1 hour	Solute transport.carrier-mediated transport.solute transporter (MTCC)
	Prupe.1G530900	Prupe.1G530900.2	Prupe.1G530900.2.p		Tudor/PWWP/MBT superfamily protein	1.42452	0.00464531	Over	1 hour	not assigned.not annotated
	Prupe.1G546500	Prupe.1G546500.1	Prupe.1G546500.1.p			1.48999	3.98784e-16	Over	1 hour	not assigned.not annotated
	Prupe.1G556500	Prupe.1G556500.1	Prupe.1G556500.1.p	CCR4	CRINKLY4 related 4	3.0241	5.97749e-05	Over	1 hour	Protein modification.phosphorylation.TKL protein kinase superfamily.protein kinase (Crinkly-like)
	Prupe.1G557200	Prupe.1G557200.2	Prupe.1G557200.2.p		Disease resistance protein (TIR-NBS-LRR class) family	2.26143	0.000290734	Over	1 hour	not assigned.annotated
	Prupe.1G581300	Prupe.1G581300.1	Prupe.1G581300.1.p			1.86883	0.000966487	Over	1 hour	not assigned.not annotated
	Prupe.1G583700	Prupe.1G583700.1	Prupe.1G583700.1.p		Core-2/I-branching beta-1,6-N-acetylglucosaminyltransferase family protein	1.04979	2.82512e-13	Over	1 hour	not assigned.annotated
	Prupe.1G583700	Prupe.1G583700.2	Prupe.1G583700.2.p		Core-2/I-branching beta-1,6-N-acetylglucosaminyltransferase family protein	7.65981	0.0273651	Over	1 hour	not assigned.annotated
	Prupe.1G586200	Prupe.1G586200.1	Prupe.1G586200.1.p	ATHSP22.0	HSP20-like chaperones superfamily protein	1.05548	0.0214686	Over	1 hour	Protein homeostasis.protein quality control.smallHsp holdase chaperone activities.class-ER protein
	Prupe.1G588100	Prupe.1G588100.5	Prupe.1G588100.5.p		SNARE associated Golgi protein family	1.06692	0.00105072	Over	1 hour	not assigned.not annotated
	Prupe.2G002500	Prupe.2G002500.1	Prupe.2G002500.1.p			2.1157	2.06908e-09	Over	1 hour	not assigned.not annotated
	Prupe.2G005200	Prupe.2G005200.1	Prupe.2G005200.1.p		O-fucosyltransferase family protein	1.18913	1.33999e-06	Over	1 hour	not assigned.annotated
	Prupe.2G006200	Prupe.2G006200.1	Prupe.2G006200.1.p			1.30341	0.044096	Over	1 hour	not assigned.not annotated
	Prupe.2G006400	Prupe.2G006400.1	Prupe.2G006400.1.p			1.80283	3.63213e-06	Over	1 hour	not assigned.not annotated
	Prupe.2G006900	Prupe.2G006900.1	Prupe.2G006900.1.p			1.43434	0.0126596	Over	1 hour	not assigned.not annotated
	Prupe.2G013500	Prupe.2G013500.1	Prupe.2G013500.1.p		Expressed protein	1.79178	0.00148073	Over	1 hour	not assigned.not annotated
	Prupe.2G019800	Prupe.2G019800.1	Prupe.2G019800.1.p			1.03844	0.0138539	Over	1 hour	not assigned.not annotated
	Prupe.2G023200	Prupe.2G023200.1	Prupe.2G023200.1.p	BPS1	Protein of unknown function (DUF793)	2.86506	1.41974e-09	Over	1 hour	not assigned.annotated
	Prupe.2G038400	Prupe.2G038400.1	Prupe.2G038400.1.p	NQR	NADPH:quinone oxidoreductase	2.11162	0.0148685	Over	1 hour	not assigned.annotated
	Prupe.2G055500	Prupe.2G055500.1	Prupe.2G055500.1.p		Disease resistance protein (TIR-NBS-LRR class) family	1.0269	0.0113359	Over	1 hour	External stimuli response.pathogen.effector-triggered immunity (ETI) network.effector receptor (NLR)
	Prupe.2G055700	Prupe.2G055700.1	Prupe.2G055700.1.p		disease resistance protein (TIR-NBS-LRR class), putative	1.02519	0.0061104	Over	1 hour	External stimuli response.pathogen.effector-triggered immunity (ETI) network.effector receptor (NLR)
	Prupe.2G057100	Prupe.2G057100.1	Prupe.2G057100.1.p	BAL,SNC1	disease resistance protein (TIR-NBS-LRR class), putative	1.80122	3.22225e-09	Over	1 hour	External stimuli response.pathogen.effector-triggered immunity (ETI) network.effector receptor (NLR)
	Prupe.2G057100	Prupe.2G057100.2	Prupe.2G057100.2.p	BAL,SNC1	disease resistance protein (TIR-NBS-LRR class), putative	10.6167	0.0223707	Over	1 hour	not assigned.annotated
	Prupe.2G057600	Prupe.2G057600.2	Prupe.2G057600.2.p		disease resistance protein (TIR-NBS-LRR class), putative	2.15052	0.0276696	Over	1 hour	not assigned.annotated
	Prupe.2G057800	Prupe.2G057800.1	Prupe.2G057800.1.p		disease resistance protein (TIR-NBS-LRR class), putative	1.37489	0.00392763	Over	1 hour	External stimuli response.pathogen.effector-triggered immunity (ETI) network.effector receptor (NLR)
	Prupe.2G068400	Prupe.2G068400.1	Prupe.2G068400.1.p		Disease resistance protein (TIR-NBS-LRR class) family	1.24656	0.00624881	Over	1 hour	External stimuli response.pathogen.effector-triggered immunity (ETI) network.effector receptor (NLR)
	Prupe.2G086100	Prupe.2G086100.1	Prupe.2G086100.1.p			2.46908	1.42546e-16	Over	1 hour	not assigned.annotated
	Prupe.2G087700	Prupe.2G087700.2	Prupe.2G087700.2.p	RPS14	mitochondrial ribosomal protein S14	5.12065	0.0257324	Over	1 hour	Protein biosynthesis.organelle machinery.mitochondrial ribosome.small ribosomal subunit proteome.component mtRPS14
	Prupe.2G088900	Prupe.2G088900.1	Prupe.2G088900.1.p		Protein kinase superfamily protein	1.13331	6.12041e-05	Over	1 hour	Enzyme classification.EC_2 transferases.EC_2.7 transferase transferring phosphorus-containing group
	Prupe.2G092800	Prupe.2G092800.1	Prupe.2G092800.1.p	PR5K	PR5-like receptor kinase	1.09024	0.0351116	Over	1 hour	Enzyme classification.EC_2 transferases.EC_2.7 transferase transferring phosphorus-containing group
	Prupe.2G106200	Prupe.2G106200.1	Prupe.2G106200.1.p			2.04706	0.00062974	Over	1 hour	not assigned.not annotated
	Prupe.2G106300	Prupe.2G106300.1	Prupe.2G106300.1.p			2.42891	0.00920679	Over	1 hour	not assigned.not annotated
	Prupe.2G113300	Prupe.2G113300.1	Prupe.2G113300.1.p		Disease resistance protein (TIR-NBS-LRR class) family	1.84167	1.28067e-06	Over	1 hour	not assigned.not annotated
	Prupe.2G114000	Prupe.2G114000.4	Prupe.2G114000.4.p	PYR6	P-loop containing nucleoside triphosphate hydrolases superfamily protein	1.38332	0.0103837	Over	1 hour	Nucleotide metabolism.pyrimidines.phosphotransfers.uridylate kinase
	Prupe.2G114000	Prupe.2G114000.5	Prupe.2G114000.5.p	PYR6	P-loop containing nucleoside triphosphate hydrolases superfamily protein	1.05761	0.00975392	Over	1 hour	Nucleotide metabolism.pyrimidines.phosphotransfers.uridylate kinase
	Prupe.2G114900	Prupe.2G114900.1	Prupe.2G114900.1.p			1.25389	1.52699e-10	Over	1 hour	not assigned.not annotated
	Prupe.2G122000	Prupe.2G122000.1	Prupe.2G122000.1.p	PRA1.F4	prenylated RAB acceptor 1.F4	1.44527	0.00211556	Over	1 hour	Vesicle trafficking.regulation of membrane tethering and fusion.RAB-GTPase membrane association.RAB-GDI displacement factor (GDF) activities.B-G-class Rab-GDF protein
	Prupe.2G136300	Prupe.2G136300.3	Prupe.2G136300.3.p	UNE10	basic helix-loop-helix (bHLH) DNA-binding superfamily protein	1.45768	2.2538e-05	Over	1 hour	RNA biosynthesis.transcriptional regulation.transcription factor (bHLH)
	Prupe.2G140600	Prupe.2G140600.1	Prupe.2G140600.1.p		SAUR-like auxin-responsive protein family	1.79847	3.18661e-07	Over	1 hour	not assigned.annotated
	Prupe.2G144400	Prupe.2G144400.2	Prupe.2G144400.2.p			1.45473	0.0370726	Over	1 hour	not assigned.not annotated
	Prupe.2G152600	Prupe.2G152600.1	Prupe.2G152600.1.p		TCP family transcription factor	2.76176	1.65303e-25	Over	1 hour	RNA biosynthesis.transcriptional regulation.transcription factor (TCP)
	Prupe.2G157300	Prupe.2G157300.1	Prupe.2G157300.1.p	BAL,BAP2	BON association protein 2	2.65751	9.19305e-11	Over	1 hour	Multi-process regulation.Programmed Cell Death (PCD) system.BON-interacting PCD co-suppressor (BAP)
	Prupe.2G157400	Prupe.2G157400.1	Prupe.2G157400.1.p	BAL,BAP2	BON association protein 2	1.96633	1.88776e-07	Over	1 hour	Multi-process regulation.Programmed Cell Death (PCD) system.BON-interacting PCD co-suppressor (BAP)
	Prupe.2G160100	Prupe.2G160100.4	Prupe.2G160100.4.p		NAD(P)-binding Rossmann-fold superfamily protein	1.11636	0.000179293	Over	1 hour	Enzyme classification.EC_1 oxidoreductases.EC_1.1 oxidoreductase acting on CH-OH group of donor
	Prupe.2G178400	Prupe.2G178400.1	Prupe.2G178400.1.p		Late embryogenesis abundant (LEA) hydroxyproline-rich glycoprotein family	1.20266	0.00461692	Over	1 hour	not assigned.not annotated
	Prupe.2G179200	Prupe.2G179200.1	Prupe.2G179200.1.p		Fatty acid/sphingolipid desaturase	1.10641	0.00254495	Over	1 hour	Lipid metabolism.sphingolipid biosynthesis.delta-8 sphingolipid desaturase
	Prupe.2G181700	Prupe.2G181700.1	Prupe.2G181700.1.p	ATBAG6,BAG6	BCL-2-associated athanogene 6	1.9551	2.65541e-11	Over	1 hour	not assigned.annotated
	Prupe.2G182800	Prupe.2G182800.7	Prupe.2G182800.7.p	GBF3	G-box binding factor 3	1.24789	0.0293271	Over	1 hour	RNA biosynthesis.transcriptional regulation.bZIP transcription factor superfamily.transcription factor (bZIP)
	Prupe.2G182800	Prupe.2G182800.8	Prupe.2G182800.8.p	GBF3	G-box binding factor 3	2.24691	0.00448243	Over	1 hour	RNA biosynthesis.transcriptional regulation.bZIP transcription factor superfamily.transcription factor (bZIP)
	Prupe.2G184800	Prupe.2G184800.1	Prupe.2G184800.1.p	GT72B1,UGT72B1	UDP-Glycosyltransferase superfamily protein	1.74576	4.12726e-10	Over	1 hour	Enzyme classification.EC_2 transferases.EC_2.4 glycosyltransferase
	Prupe.2G185100	Prupe.2G185100.1	Prupe.2G185100.1.p	ATWRKY53,WRKY53	WRKY family transcription factor	1.37017	0.0120741	Over	1 hour	RNA biosynthesis.transcriptional regulation.transcription factor (WRKY)
	Prupe.2G188300	Prupe.2G188300.1	Prupe.2G188300.1.p		Protein of unknown function (DUF1442)	2.32208	3.48842e-07	Over	1 hour	not assigned.not annotated
	Prupe.2G190100	Prupe.2G190100.2	Prupe.2G190100.2.p		basic helix-loop-helix (bHLH) DNA-binding superfamily protein	1.34516	0.0195634	Over	1 hour	RNA biosynthesis.transcriptional regulation.transcription factor (bHLH)
	Prupe.2G197000	Prupe.2G197000.1	Prupe.2G197000.1.p			1.30349	0.00341494	Over	1 hour	not assigned.not annotated
	Prupe.2G205900	Prupe.2G205900.1	Prupe.2G205900.1.p		Protein of unknown function (DUF1635)	1.79972	0.000546388	Over	1 hour	not assigned.not annotated
	Prupe.2G211800	Prupe.2G211800.1	Prupe.2G211800.1.p	ATPAL1,PAL1	PHE ammonia lyase 1	1.5357	0.0104378	Over	1 hour	Secondary metabolism.phenolics.p-coumaroyl-CoA biosynthesis.phenylalanine ammonia lyase activity.phenylalanine ammonia lyase (PAL)
	Prupe.2G212900	Prupe.2G212900.1	Prupe.2G212900.1.p	BME3,BME3-ZF,GATA8	Plant-specific GATA-type zinc finger transcription factor family protein	1.81717	0.000575076	Over	1 hour	RNA biosynthesis.transcriptional regulation.C2C2 transcription factor superfamily.transcription factor (GATA)
	Prupe.2G212900	Prupe.2G212900.2	Prupe.2G212900.2.p	BME3,BME3-ZF,GATA8	Plant-specific GATA-type zinc finger transcription factor family protein	1.81213	0.0021413	Over	1 hour	RNA biosynthesis.transcriptional regulation.C2C2 transcription factor superfamily.transcription factor (GATA)
	Prupe.2G217000	Prupe.2G217000.1	Prupe.2G217000.1.p			1.16645	7.28902e-07	Over	1 hour	not assigned.not annotated
	Prupe.2G217100	Prupe.2G217100.1	Prupe.2G217100.1.p			1.24563	2.81935e-06	Over	1 hour	not assigned.not annotated
	Prupe.2G224600	Prupe.2G224600.3	Prupe.2G224600.3.p		SAC3/GANP/Nin1/mts3/eIF-3 p25 family	7.65949	3.59526e-14	Over	1 hour	RNA processing.messenger ribonucleoparticle (mRNP) export.TREX-2 mRNP trafficking complex.scaffold component GANP/SAC3
	Prupe.2G230800	Prupe.2G230800.1	Prupe.2G230800.1.p		C2H2-type zinc finger family protein	1.13279	9.53692e-05	Over	1 hour	RNA biosynthesis.transcriptional regulation.transcription factor (C2H2-ZF)
	Prupe.2G239700	Prupe.2G239700.2	Prupe.2G239700.2.p	AHG3,ATPP2CA,PP2CA	protein phosphatase 2CA	1.40094	7.7534e-68	Over	1 hour	not assigned.annotated
	Prupe.2G244200	Prupe.2G244200.1	Prupe.2G244200.1.p	ZCF37	ZCF37	1.46668	0.0491481	Over	1 hour	not assigned.not annotated
	Prupe.2G247600	Prupe.2G247600.1	Prupe.2G247600.1.p	ATHSPRO2,HSPRO2	ortholog of sugar beet HS1 PRO-1 2	1.77414	3.95774e-13	Over	1 hour	not assigned.annotated
	Prupe.2G249300	Prupe.2G249300.1	Prupe.2G249300.1.p		Alpha/beta hydrolase related protein	1.56603	1.25197e-05	Over	1 hour	not assigned.not annotated
	Prupe.2G251000	Prupe.2G251000.1	Prupe.2G251000.1.p	ATSZF2,CZF1,SZF2,ZFAR1	zinc finger (CCCH-type) family protein	1.54929	7.9116e-09	Over	1 hour	RNA processing.mRNA sequestration.mRNA-binding regulatory factor (TZF)
	Prupe.2G252200	Prupe.2G252200.1	Prupe.2G252200.1.p		Protein phosphatase 2C family protein	1.76318	4.21529e-17	Over	1 hour	not assigned.annotated
	Prupe.2G262900	Prupe.2G262900.1	Prupe.2G262900.1.p			1.88724	4.64241e-05	Over	1 hour	not assigned.not annotated
	Prupe.2G264000	Prupe.2G264000.1	Prupe.2G264000.1.p			2.09755	3.24615e-09	Over	1 hour	not assigned.not annotated
	Prupe.2G282100	Prupe.2G282100.1	Prupe.2G282100.1.p			1.60927	4.19066e-07	Over	1 hour	not assigned.not annotated
	Prupe.2G289500	Prupe.2G289500.1	Prupe.2G289500.1.p	CBF4,DREB1D	C-repeat-binding factor 4	3.29664	6.4183e-05	Over	1 hour	RNA biosynthesis.transcriptional regulation.AP2/ERF transcription factor superfamily.transcription factor (DREB)/External stimuli response.temperature.cold response.ICE-CBF cold acclimation transcriptional cascade.transcription factor (CBF/DREB1)
	Prupe.2G289600	Prupe.2G289600.1	Prupe.2G289600.1.p		Integrase-type DNA-binding superfamily protein	1.80964	0.000274636	Over	1 hour	RNA biosynthesis.transcriptional regulation.AP2/ERF transcription factor superfamily.transcription factor (DREB)
	Prupe.2G293400	Prupe.2G293400.1	Prupe.2G293400.1.p		Transducin/WD40 repeat-like superfamily protein	2.59755	0.00149623	Over	1 hour	External stimuli response.light.UV-B light.regulatory protein (RUP)
	Prupe.2G294400	Prupe.2G294400.4	Prupe.2G294400.4.p	LTI65,RD29B	CAP160 protein	1.23321	0.0280197	Over	1 hour	not assigned.annotated
	Prupe.2G296900	Prupe.2G296900.5	Prupe.2G296900.5.p		alpha/beta-Hydrolases superfamily protein	6.10695	0.00571199	Over	1 hour	not assigned.not annotated
	Prupe.2G297800	Prupe.2G297800.1	Prupe.2G297800.1.p			1.02245	0.00200764	Over	1 hour	not assigned.not annotated
	Prupe.2G299000	Prupe.2G299000.1	Prupe.2G299000.1.p	ATDTX35,DTX35,FFT	detoxifying efflux carrier 35	3.60385	0.0193822	Over	1 hour	Solute transport.carrier-mediated transport.MOP superfamily.MATE family.metabolite transporter (DTX)
	Prupe.2G303300	Prupe.2G303300.1	Prupe.2G303300.1.p		Late embryogenesis abundant (LEA) hydroxyproline-rich glycoprotein family	2.90231	5.6695e-06	Over	1 hour	not assigned.not annotated
	Prupe.2G315800	Prupe.2G315800.1	Prupe.2G315800.1.p		P-loop containing nucleoside triphosphate hydrolases superfamily protein	1.30355	0.00940142	Over	1 hour	not assigned.annotated
	Prupe.2G320600	Prupe.2G320600.2	Prupe.2G320600.2.p	ANAC091,TIP	TCV-interacting protein	1.96786	0.000548122	Over	1 hour	RNA biosynthesis.transcriptional regulation.transcription factor (NAC)
	Prupe.3G005100	Prupe.3G005100.1	Prupe.3G005100.1.p	AtGolS1,GolS1	galactinol synthase 1	1.70925	0.00948097	Over	1 hour	Carbohydrate metabolism.oligosaccharide metabolism.galactinol synthase
	Prupe.3G006100	Prupe.3G006100.1	Prupe.3G006100.1.p		Protein phosphatase 2C family protein	1.46525	5.72303e-32	Over	1 hour	RNA biosynthesis.transcriptional regulation.transcription factor (DBP)
	Prupe.3G006300	Prupe.3G006300.1	Prupe.3G006300.1.p	ATMYB2,MYB2	myb domain protein 2	1.86401	4.22662e-06	Over	1 hour	RNA biosynthesis.transcriptional regulation.MYB transcription factor superfamily.transcription factor (MYB)
	Prupe.3G016100	Prupe.3G016100.1	Prupe.3G016100.1.p			1.56605	0.00812471	Over	1 hour	not assigned.not annotated
	Prupe.3G016200	Prupe.3G016200.1	Prupe.3G016200.1.p		Adenine nucleotide alpha hydrolases-like superfamily protein	1.76545	0.010618	Over	1 hour	not assigned.not annotated
	Prupe.3G017100	Prupe.3G017100.1	Prupe.3G017100.1.p	AtMYB20,MYB20	myb domain protein 20	2.274	3.93694e-07	Over	1 hour	RNA biosynthesis.transcriptional regulation.MYB transcription factor superfamily.transcription factor (MYB)
	Prupe.3G020100	Prupe.3G020100.1	Prupe.3G020100.1.p	BBX32	B-box 32	1.95674	2.85896e-07	Over	1 hour	not assigned.not annotated
	Prupe.3G027200	Prupe.3G027200.2	Prupe.3G027200.2.p		Major facilitator superfamily protein	8.79624	2.37255e-06	Over	1 hour	Solute transport.carrier-mediated transport.MFS superfamily.OCT family.nicotinate transporter (NiaP)
	Prupe.3G028000	Prupe.3G028000.1	Prupe.3G028000.1.p			1.7851	6.40566e-06	Over	1 hour	not assigned.not annotated
	Prupe.3G044600	Prupe.3G044600.1	Prupe.3G044600.1.p		hydroxyproline-rich glycoprotein family protein	1.0634	0.00256856	Over	1 hour	not assigned.not annotated
	Prupe.3G046200	Prupe.3G046200.2	Prupe.3G046200.2.p		SNARE-like superfamily protein	7.30322	0.0343687	Over	1 hour	Vesicle trafficking.Coat protein I (COPI) coatomer machinery.coat protein complex.cargo adaptor F-subcomplex.subunit zeta
	Prupe.3G053400	Prupe.3G053400.1	Prupe.3G053400.1.p			2.02604	0.000106387	Over	1 hour	not assigned.not annotated
	Prupe.3G084900	Prupe.3G084900.1	Prupe.3G084900.1.p			1.09553	2.06093e-06	Over	1 hour	not assigned.not annotated
	Prupe.3G087000	Prupe.3G087000.1	Prupe.3G087000.1.p		Protein of unknown function (DUF567)	1.25579	1.31305e-06	Over	1 hour	not assigned.annotated
	Prupe.3G091600	Prupe.3G091600.1	Prupe.3G091600.1.p		Plant protein of unknown function (DUF247)	1.40759	5.93847e-09	Over	1 hour	not assigned.annotated
	Prupe.3G108600	Prupe.3G108600.1	Prupe.3G108600.1.p			1.24311	1.84378e-08	Over	1 hour	not assigned.not annotated
	Prupe.3G108700	Prupe.3G108700.1	Prupe.3G108700.1.p	AT-HSFA4C,HSFA4C,RHA1	winged-helix DNA-binding transcription factor family protein	1.185	1.45641e-08	Over	1 hour	RNA biosynthesis.transcriptional regulation.transcription factor (HSF)
	Prupe.3G108700	Prupe.3G108700.2	Prupe.3G108700.2.p	AT-HSFA4C,HSFA4C,RHA1	winged-helix DNA-binding transcription factor family protein	2.1298	3.37314e-11	Over	1 hour	RNA biosynthesis.transcriptional regulation.transcription factor (HSF)
	Prupe.3G112900	Prupe.3G112900.1	Prupe.3G112900.1.p		Protein kinase superfamily protein	1.69137	2.49674e-15	Over	1 hour	Enzyme classification.EC_2 transferases.EC_2.7 transferase transferring phosphorus-containing group
	Prupe.3G117200	Prupe.3G117200.1	Prupe.3G117200.1.p			10.836	0.0004678	Over	1 hour	not assigned.not annotated
	Prupe.3G117500	Prupe.3G117500.1	Prupe.3G117500.1.p		Protein of unknown function (DUF688)	8.60281	3.86553e-09	Over	1 hour	not assigned.not annotated
	Prupe.3G123000	Prupe.3G123000.1	Prupe.3G123000.1.p	TBL1	Plant protein of unknown function (DUF828)	1.21407	0.00263117	Over	1 hour	Cell wall organisation.hemicellulose.xylan.modification and degradation.xylan O-acetyltransferase (XOAT)
	Prupe.3G145700	Prupe.3G145700.1	Prupe.3G145700.1.p		Protein kinase superfamily protein	2.20675	5.16797e-08	Over	1 hour	Enzyme classification.EC_2 transferases.EC_2.7 transferase transferring phosphorus-containing group
	Prupe.3G157100	Prupe.3G157100.1	Prupe.3G157100.1.p		Integrase-type DNA-binding superfamily protein	1.11762	0.00413557	Over	1 hour	RNA biosynthesis.transcriptional regulation.AP2/ERF transcription factor superfamily.transcription factor (DREB)
	Prupe.3G157300	Prupe.3G157300.1	Prupe.3G157300.1.p			1.7161	0.000372314	Over	1 hour	not assigned.not annotated
	Prupe.3G160600	Prupe.3G160600.1	Prupe.3G160600.1.p		Calcium-binding EF-hand family protein	1.31217	0.00014615	Over	1 hour	not assigned.annotated
	Prupe.3G162700	Prupe.3G162700.1	Prupe.3G162700.1.p		Calcium-dependent lipid-binding (CaLB domain) family protein	2.13386	1.37267e-15	Over	1 hour	Phytohormone action.abscisic acid.perception and signalling.PYR/PYL-receptor.recruitment factor (CAR)
	Prupe.3G163100	Prupe.3G163100.1	Prupe.3G163100.1.p	AtMYB113,MYB113	myb domain protein 113	1.64254	0.000643637	Over	1 hour	RNA biosynthesis.transcriptional regulation.MYB transcription factor superfamily.transcription factor (MYB)
	Prupe.3G164200	Prupe.3G164200.1	Prupe.3G164200.1.p		ARM repeat superfamily protein	2.25977	2.39929e-05	Over	1 hour	not assigned.annotated
	Prupe.3G168500	Prupe.3G168500.3	Prupe.3G168500.3.p	atcax2,CAX2	cation exchanger 2	1.57719	0.0449055	Over	1 hour	Solute transport.carrier-mediated transport.CDF superfamily.CaCA family.cation antiporter (CAX)
	Prupe.3G171500	Prupe.3G171500.1	Prupe.3G171500.1.p	XTH16	xyloglucan endotransglucosylase/hydrolase 16	3.46228	1.78859e-21	Over	1 hour	Enzyme classification.EC_2 transferases.EC_2.4 glycosyltransferase
	Prupe.3G171800	Prupe.3G171800.1	Prupe.3G171800.1.p	XTH16	xyloglucan endotransglucosylase/hydrolase 16	2.15535	1.334e-07	Over	1 hour	Enzyme classification.EC_2 transferases.EC_2.4 glycosyltransferase
	Prupe.3G177100	Prupe.3G177100.1	Prupe.3G177100.1.p		Eukaryotic aspartyl protease family protein	1.15761	0.0177442	Over	1 hour	Protein homeostasis.proteolysis.aspartic-type peptidase activities.A1-class protease (Pepsin)
	Prupe.3G184600	Prupe.3G184600.1	Prupe.3G184600.1.p	UGT71B6	UDP-glucosyl transferase 71B6	1.85376	1.07737e-07	Over	1 hour	Enzyme classification.EC_2 transferases.EC_2.4 glycosyltransferase
	Prupe.3G184900	Prupe.3G184900.1	Prupe.3G184900.1.p	UGT71B6	UDP-glucosyl transferase 71B6	1.07333	0.000468538	Over	1 hour	Enzyme classification.EC_2 transferases.EC_2.4 glycosyltransferase
	Prupe.3G185000	Prupe.3G185000.1	Prupe.3G185000.1.p		UDP-Glycosyltransferase superfamily protein	1.15965	5.48864e-05	Over	1 hour	Enzyme classification.EC_2 transferases.EC_2.4 glycosyltransferase
	Prupe.3G191600	Prupe.3G191600.3	Prupe.3G191600.3.p		RING/U-box superfamily protein	5.84025	0.0260488	Over	1 hour	Protein homeostasis.ubiquitin-proteasome system.ubiquitin-fold protein conjugation.ubiquitin conjugation (ubiquitylation).ubiquitin-ligase E3 activities.RING-domain E3 ligase activities.RING-v-class E3 ligase
	Prupe.3G198000	Prupe.3G198000.4	Prupe.3G198000.4.p		beta-1,2-N-acetylglucosaminyltransferase II	1.32316	0.00160638	Over	1 hour	Protein modification.glycosylation.N-linked glycosylation.complex N-glycan maturation.N-acetylglucosaminyltransferase (GnT-II)
	Prupe.3G201500	Prupe.3G201500.1	Prupe.3G201500.1.p	OBE2	Protein of unknown function (DUF1423)	1.48706	0.010712	Over	1 hour	not assigned.annotated
	Prupe.3G223500	Prupe.3G223500.2	Prupe.3G223500.2.p			1.39567	0.000158239	Over	1 hour	not assigned.not annotated
	Prupe.3G224800	Prupe.3G224800.1	Prupe.3G224800.1.p	PBP1	pinoid-binding protein 1	1.39108	0.0208529	Over	1 hour	not assigned.annotated
	Prupe.3G227800	Prupe.3G227800.1	Prupe.3G227800.1.p	ATMYB15,ATY19,MYB15	myb domain protein 15	1.69737	0.0184412	Over	1 hour	RNA biosynthesis.transcriptional regulation.MYB transcription factor superfamily.transcription factor (MYB)
	Prupe.3G235900	Prupe.3G235900.1	Prupe.3G235900.1.p			1.30281	0.0237581	Over	1 hour	not assigned.not annotated
	Prupe.3G245300	Prupe.3G245300.1	Prupe.3G245300.1.p	GDU1	glutamine dumper 1	1.13838	2.2042e-05	Over	1 hour	not assigned.not annotated
	Prupe.3G253900	Prupe.3G253900.1	Prupe.3G253900.1.p		HXXXD-type acyl-transferase family protein	2.08683	1.48792e-12	Over	1 hour	Enzyme classification.EC_2 transferases.EC_2.3 acyltransferase
	Prupe.3G272700	Prupe.3G272700.1	Prupe.3G272700.1.p			1.2613	0.00314854	Over	1 hour	not assigned.not annotated
	Prupe.3G276500	Prupe.3G276500.1	Prupe.3G276500.1.p	GATL10	galacturonosyltransferase-like 10	1.76059	3.19635e-05	Over	1 hour	Cell wall organisation.hemicellulose.xylan.biosynthesis.galacturonosyltransferase
	Prupe.3G277900	Prupe.3G277900.1	Prupe.3G277900.1.p		Matrixin family protein	2.04825	0.00365656	Over	1 hour	Protein homeostasis.proteolysis.metallopeptidase activities.M10-class metalloprotease (Matrixin)
	Prupe.3G278000	Prupe.3G278000.1	Prupe.3G278000.1.p		Matrixin family protein	1.58196	0.0189581	Over	1 hour	Protein homeostasis.proteolysis.metallopeptidase activities.M10-class metalloprotease (Matrixin)
	Prupe.3G281700	Prupe.3G281700.1	Prupe.3G281700.1.p			1.41159	0.00662336	Over	1 hour	Phytohormone action.signalling peptides.NCRP (non-cysteine-rich-peptide) category.PIP/PIPL-peptide activity.PIP/PIPL-precursor polypeptide
	Prupe.3G285800	Prupe.3G285800.1	Prupe.3G285800.1.p		Protein of unknown function (DUF1645)	1.35551	1.33159e-16	Over	1 hour	not assigned.not annotated
	Prupe.3G289400	Prupe.3G289400.2	Prupe.3G289400.2.p		DNAJ heat shock N-terminal domain-containing protein	5.89974	0.0383354	Over	1 hour	not assigned.annotated
	Prupe.3G293400	Prupe.3G293400.4	Prupe.3G293400.4.p		beta-1,4-N-acetylglucosaminyltransferase family protein	1.07615	0.00273168	Over	1 hour	not assigned.not annotated
	Prupe.3G303600	Prupe.3G303600.1	Prupe.3G303600.1.p	CML38	calmodulin-like 38	1.74409	5.61896e-05	Over	1 hour	not assigned.annotated
	Prupe.4G007500	Prupe.4G007500.1	Prupe.4G007500.1.p	SCL13	SCARECROW-like 13	1.70812	4.87577e-14	Over	1 hour	RNA biosynthesis.transcriptional regulation.transcription factor (GRAS)
	Prupe.4G011000	Prupe.4G011000.1	Prupe.4G011000.1.p	ATBAG5,BAG5	BCL-2-associated athanogene 5	1.37125	1.04857e-07	Over	1 hour	not assigned.annotated
	Prupe.4G013500	Prupe.4G013500.1	Prupe.4G013500.1.p	ATCOP1,COP1,DET340,EMB168,FUS1	Transducin/WD40 repeat-like superfamily protein	1.03205	3.14921e-08	Over	1 hour	Protein homeostasis.ubiquitin-proteasome system.ubiquitin-fold protein conjugation.Cullin-based ubiquitylation complexes.CUL4-DDB1 ubiquitination complexes.COP1-SPA substrate adaptor subcomplex.component COP1 / External stimuli response.light.red/far red light.CUL4-DDB1 ubiquitination complex.COP1-SPA substrate adaptor subcomplex.component COP1
	Prupe.4G017800	Prupe.4G017800.1	Prupe.4G017800.1.p	MAPKKK15	mitogen-activated protein kinase kinase kinase 15	1.46014	0.049039	Over	1 hour	Protein modification.phosphorylation.STE protein kinase superfamily.protein kinase (MAP3K-MEKK)
	Prupe.4G018400	Prupe.4G018400.1	Prupe.4G018400.1.p		F-box family protein with a domain of unknown function (DUF295)	1.67508	8.4129e-08	Over	1 hour	not assigned.annotated
	Prupe.4G028800	Prupe.4G028800.1	Prupe.4G028800.1.p	CRK29	cysteine-rich RLK (RECEPTOR-like protein kinase) 29	1.29935	0.000114798	Over	1 hour	Protein modification.phosphorylation.TKL protein kinase superfamily.protein kinase (DUF26)/Protein modification.phosphorylation.TKL protein kinase superfamily.G-Lectin protein kinase families.protein kinase (SD-1)
	Prupe.4G029300	Prupe.4G029300.1	Prupe.4G029300.1.p	PSBQ,PSBQ-2,PSII-Q	photosystem II subunit Q-2	1.87187	0.00227317	Over	1 hour	Photosynthesis.photophosphorylation.photosystem II.PS-II complex.oxygen-evolving center (OEC) extrinsic proteins.Viridiplantae-specific components.component OEC16/PsbQ
	Prupe.4G031600	Prupe.4G031600.1	Prupe.4G031600.1.p		S-locus lectin protein kinase family protein	1.09376	1.80293e-05	Over	1 hour	Protein modification.phosphorylation.TKL protein kinase superfamily.G-Lectin protein kinase families.protein kinase (SD-1)
	Prupe.4G032200	Prupe.4G032200.2	Prupe.4G032200.2.p		S-locus lectin protein kinase family protein	1.20404	0.0283758	Over	1 hour	Protein modification.phosphorylation.TKL protein kinase superfamily.G-Lectin protein kinase families.protein kinase (SD-1)
	Prupe.4G033200	Prupe.4G033200.1	Prupe.4G033200.1.p	B120	S-locus lectin protein kinase family protein	1.01152	0.0242062	Over	1 hour	Protein modification.phosphorylation.TKL protein kinase superfamily.G-Lectin protein kinase families.protein kinase (SD-1)
	Prupe.4G035700	Prupe.4G035700.1	Prupe.4G035700.1.p		Protein of unknown function (DUF761)	1.34335	1.15038e-08	Over	1 hour	not assigned.not annotated
	Prupe.4G036800	Prupe.4G036800.1	Prupe.4G036800.1.p		F-box family protein	1.57165	0.00118342	Over	1 hour	not assigned.annotated
	Prupe.4G044300	Prupe.4G044300.1	Prupe.4G044300.1.p		CBS domain-containing protein	3.1344	7.07373e-100	Over	1 hour	not assigned.annotated
	Prupe.4G050500	Prupe.4G050500.2	Prupe.4G050500.2.p	ATMBAC1,MBAC1	Mitochondrial substrate carrier family protein	7.25794	0.00335428	Over	1 hour	Amino acid metabolism.biosynthesis.glutamate family.arginine and ornithine transporter / Solute transport.carrier-mediated transport.solute transporter (MTCC)
	Prupe.4G051400	Prupe.4G051400.1	Prupe.4G051400.1.p	ATERF-9,ATERF9,ERF9	erf domain protein 9	1.27338	2.3776e-24	Over	1 hour	RNA biosynthesis.transcriptional regulation.AP2/ERF transcription factor superfamily.transcription factor (ERF)
	Prupe.4G053500	Prupe.4G053500.1	Prupe.4G053500.1.p	GRX480,roxy19	Thioredoxin superfamily protein	2.33229	4.23001e-09	Over	1 hour	Protein modification.S-glutathionylation.glutaredoxin
	Prupe.4G055500	Prupe.4G055500.1	Prupe.4G055500.1.p	ATERF-2,ATERF2,ERF2	ethylene responsive element binding factor 2	1.01831	0.0300066	Over	1 hour	RNA biosynthesis.transcriptional regulation.AP2/ERF transcription factor superfamily.transcription factor (ERF)
	Prupe.4G057300	Prupe.4G057300.1	Prupe.4G057300.1.p	ATNUDT15,ATNUDX15,NUDX15	nudix hydrolase homolog 15	1.3161	1.15525e-16	Over	1 hour	not assigned.annotated
	Prupe.4G057600	Prupe.4G057600.1	Prupe.4G057600.1.p		HXXXD-type acyl-transferase family protein	1.50841	2.35086e-05	Over	1 hour	Enzyme classification.EC_2 transferases.EC_2.3 acyltransferase
	Prupe.4G061800	Prupe.4G061800.7	Prupe.4G061800.7.p		sequence-specific DNA binding transcription factors	5.10689	0.0286369	Over	1 hour	RNA biosynthesis.transcriptional regulation.transcription factor (Trihelix)
	Prupe.4G066000	Prupe.4G066000.1	Prupe.4G066000.1.p			2.81777	2.03406e-05	Over	1 hour	not assigned.not annotated
	Prupe.4G067500	Prupe.4G067500.1	Prupe.4G067500.1.p		SecY protein transport family protein	1.16762	0.00347541	Over	1 hour	Protein translocation.endoplasmic reticulum.co-translational insertion system.Sec61 subcomplex.subunit alpha
	Prupe.4G067800	Prupe.4G067800.1	Prupe.4G067800.1.p	ATPUB17,PUB17	plant U-box 17	1.29082	3.6582e-05	Over	1 hour	not assigned.annotated
	Prupe.4G068200	Prupe.4G068200.5	Prupe.4G068200.5.p	BEH4	BES1/BZR1 homolog 4	1.59109	6.16821e-10	Over	1 hour	RNA biosynthesis.transcriptional regulation.transcription factor (BZR)
	Prupe.4G069700	Prupe.4G069700.6	Prupe.4G069700.6.p		Leucine-rich repeat transmembrane protein kinase	5.12132	0.0401264	Over	1 hour	Protein modification.phosphorylation.TKL protein kinase superfamily.LRR-VIII protein kinase families.protein kinase (LRR-VIII-2)
	Prupe.4G077900	Prupe.4G077900.1	Prupe.4G077900.1.p			1.03002	0.00413298	Over	1 hour	not assigned.not annotated
	Prupe.4G086500	Prupe.4G086500.1	Prupe.4G086500.1.p		alpha/beta-Hydrolases superfamily protein	1.52509	0.00715073	Over	1 hour	Lipid metabolism.lipid degradation.phospholipase activities.phospholipase A1 activities.phospholipase A1 (PC-PLA1)
	Prupe.4G095400	Prupe.4G095400.3	Prupe.4G095400.3.p		ethylene-responsive nuclear protein / ethylene-regulated nuclear protein (ERT2)	1.36769	8.46745e-21	Over	1 hour	not assigned.not annotated
	Prupe.4G098300	Prupe.4G098300.1	Prupe.4G098300.1.p		FAD-binding Berberine family protein	1.0157	0.0167548	Over	1 hour	Enzyme classification.EC_1 oxidoreductases.EC_1.1 oxidoreductase acting on CH-OH group of donor
	Prupe.4G104700	Prupe.4G104700.1	Prupe.4G104700.1.p		Leucine-rich repeat transmembrane protein kinase	1.0279	0.0207174	Over	1 hour	Protein modification.phosphorylation.TKL protein kinase superfamily.LRR-VIII protein kinase families.protein kinase (LRR-VIII-2)
	Prupe.4G146400	Prupe.4G146400.1	Prupe.4G146400.1.p	ATGSTU19,GST8,GSTU19	glutathione S-transferase TAU 19	2.79202	0.00516457	Over	1 hour	Protein modification.S-glutathionylation.glutathione S-transferase activities.class tau glutathione S-transferase
	Prupe.4G148000	Prupe.4G148000.1	Prupe.4G148000.1.p		Nucleotide/sugar transporter family protein	1.63934	0.0156867	Over	1 hour	Solute transport.carrier-mediated transport.DMT superfamily.NST-TPT group.nucleotide sugar transporter (UAfT)
	Prupe.4G162000	Prupe.4G162000.1	Prupe.4G162000.1.p		Leucine-rich receptor-like protein kinase family protein	1.39406	4.91044e-05	Over	1 hour	not assigned.annotated
	Prupe.4G165500	Prupe.4G165500.1	Prupe.4G165500.1.p		Curculin-like (mannose-binding) lectin family protein	1.97532	0.0133863	Over	1 hour	not assigned.annotated
	Prupe.4G165600	Prupe.4G165600.1	Prupe.4G165600.1.p		D-mannose binding lectin protein with Apple-like carbohydrate-binding domain	3.15449	8.19067e-12	Over	1 hour	not assigned.annotated
	Prupe.4G172400	Prupe.4G172400.2	Prupe.4G172400.2.p		RING/U-box superfamily protein	1.29961	0.0270325	Over	1 hour	not assigned.annotated
	Prupe.4G176200	Prupe.4G176200.1	Prupe.4G176200.1.p	ATERF-4,ATERF4,ERF4,RAP2.5	ethylene responsive element binding factor 4	1.82566	3.91609e-45	Over	1 hour	RNA biosynthesis.transcriptional regulation.AP2/ERF transcription factor superfamily.transcription factor (ERF)
	Prupe.4G181700	Prupe.4G181700.1	Prupe.4G181700.1.p		Protein of unknown function (DUF2921)	1.06795	0.00240314	Over	1 hour	not assigned.not annotated
	Prupe.4G183100	Prupe.4G183100.1	Prupe.4G183100.1.p		Dynein light chain type 1 family protein	1.35877	0.0491481	Over	1 hour	not assigned.not annotated
	Prupe.4G183300	Prupe.4G183300.1	Prupe.4G183300.1.p	ATRMA1,RMA1	RING membrane-anchor 1	1.88843	4.23374e-96	Over	1 hour	Protein homeostasis.ubiquitin-proteasome system.ubiquitin-fold protein conjugation.ubiquitin conjugation (ubiquitylation).ubiquitin-ligase E3 activities.RING-domain E3 ligase activities.RING-HC-class E3 ligase
	Prupe.4G187200	Prupe.4G187200.1	Prupe.4G187200.1.p			2.11977	1.43659e-07	Over	1 hour	not assigned.not annotated
	Prupe.4G187500	Prupe.4G187500.5	Prupe.4G187500.5.p	AtTRS130,CLUB	CLUB	7.2247	8.41257e-05	Over	1 hour	Vesicle trafficking.target membrane tethering.TRAPP (Trafficking-Protein-Particle) complexes.TRAPP-II complex-specific components.component TRS130/CLUB
	Prupe.4G190500	Prupe.4G190500.1	Prupe.4G190500.1.p	LHCB3,LHCB3*1	light-harvesting chlorophyll B-binding protein 3	1.10267	0.0396026	Over	1 hour	Photosynthesis.photophosphorylation.photosystem II.LHC-II complex.component LHCb1/2/3
	Prupe.4G193800	Prupe.4G193800.1	Prupe.4G193800.1.p		Calcium-binding EF-hand family protein	2.94879	1.84065e-11	Over	1 hour	not assigned.annotated
	Prupe.4G200200	Prupe.4G200200.2	Prupe.4G200200.2.p	PAT1	GRAS family transcription factor	1.76847	0.000148619	Over	1 hour	RNA biosynthesis.transcriptional regulation.transcription factor (GRAS)
	Prupe.4G210600	Prupe.4G210600.1	Prupe.4G210600.1.p	FAD4,FADA	fatty acid desaturase A	2.14305	9.80329e-06	Over	1 hour	Lipid metabolism.fatty acid biosynthesis.fatty acid desaturation.delta 3-trans-hexadecenoic acid phosphatidylglycerol desaturase (FAD4)
	Prupe.4G213900	Prupe.4G213900.2	Prupe.4G213900.2.p		Translation initiation factor SUI1 family protein	1.01655	3.35089e-09	Over	1 hour	Protein biosynthesis.translation initiation.Pre-Initiation Complex (PIC) module.eIF1 PIC assembly factor activity.assembly factor (eIF1)
	Prupe.4G215700	Prupe.4G215700.1	Prupe.4G215700.1.p			1.3049	0.00295609	Over	1 hour	not assigned.not annotated
	Prupe.4G217100	Prupe.4G217100.1	Prupe.4G217100.1.p		F-box family protein with a domain of unknown function (DUF295)	1.77912	0.0253402	Over	1 hour	not assigned.annotated
	Prupe.4G224500	Prupe.4G224500.1	Prupe.4G224500.1.p		disease resistance protein (TIR-NBS-LRR class), putative	1.38553	1.69574e-40	Over	1 hour	External stimuli response.pathogen.effector-triggered immunity (ETI) network.effector receptor (NLR)
	Prupe.4G229700	Prupe.4G229700.1	Prupe.4G229700.1.p		RmlC-like cupins superfamily protein	2.14607	1.03009e-09	Over	1 hour	not assigned.annotated
	Prupe.4G246600	Prupe.4G246600.1	Prupe.4G246600.1.p		Leucine-rich receptor-like protein kinase family protein	1.32424	0.0448253	Over	1 hour	not assigned.annotated
	Prupe.4G262900	Prupe.4G262900.1	Prupe.4G262900.1.p		2-oxoglutarate (2OG) and Fe(II)-dependent oxygenase superfamily protein	1.72916	0.0130928	Over	1 hour	not assigned.annotated
	Prupe.4G263000	Prupe.4G263000.1	Prupe.4G263000.1.p		2-oxoglutarate (2OG) and Fe(II)-dependent oxygenase superfamily protein	1.2219	0.000623392	Over	1 hour	not assigned.annotated
	Prupe.4G263100	Prupe.4G263100.1	Prupe.4G263100.1.p		2-oxoglutarate (2OG) and Fe(II)-dependent oxygenase superfamily protein	1.07008	0.0197029	Over	1 hour	not assigned.annotated
	Prupe.4G267600	Prupe.4G267600.1	Prupe.4G267600.1.p			1.0319	0.0237581	Over	1 hour	not assigned.not annotated
	Prupe.4G279600	Prupe.4G279600.1	Prupe.4G279600.1.p	ANAC002,ATAF1	NAC (No Apical Meristem) domain transcriptional regulator superfamily protein	1.22321	0.0188253	Over	1 hour	RNA biosynthesis.transcriptional regulation.transcription factor (NAC)
	Prupe.5G000600	Prupe.5G000600.1	Prupe.5G000600.1.p	CML38	calmodulin-like 38	2.09447	0.00148899	Over	1 hour	not assigned.annotated
	Prupe.5G001600	Prupe.5G001600.1	Prupe.5G001600.1.p			2.14572	8.30082e-24	Over	1 hour	not assigned.not annotated
	Prupe.5G004400	Prupe.5G004400.1	Prupe.5G004400.1.p			1.27476	0.035603	Over	1 hour	not assigned.not annotated
	Prupe.5G013100	Prupe.5G013100.1	Prupe.5G013100.1.p	CYP707A1	cytochrome P450, family 707, subfamily A, polypeptide 1	1.7625	6.70192e-09	Over	1 hour	Phytohormone action.abscisic acid.conjugation and degradation.abscisic acid hydroxylase
	Prupe.5G013100	Prupe.5G013100.2	Prupe.5G013100.2.p	CYP707A1	cytochrome P450, family 707, subfamily A, polypeptide 1	4.38154	0.02131	Over	1 hour	Phytohormone action.abscisic acid.conjugation and degradation.abscisic acid hydroxylase
	Prupe.5G015400	Prupe.5G015400.1	Prupe.5G015400.1.p			1.80582	0.0109543	Over	1 hour	not assigned.not annotated
	Prupe.5G018500	Prupe.5G018500.1	Prupe.5G018500.1.p	KUF1	KAR-UP F-box 1	1.89484	1.70284e-34	Over	1 hour	Phytohormone action.strigolactone.perception and signal transduction.signal transducer (KUF1)
	Prupe.5G025100	Prupe.5G025100.1	Prupe.5G025100.1.p	RPM1,RPS3	NB-ARC domain-containing disease resistance protein	1.11452	7.79302e-11	Over	1 hour	not assigned.annotated
	Prupe.5G028800	Prupe.5G028800.2	Prupe.5G028800.2.p		Transcription factor jumonji (jmj) family protein / zinc finger (C5HC2 type) family protein	1.16144	0.0142755	Over	1 hour	Chromatin organisation.histone modifications.histone lysine methylation.JmjC group histone demethylase activities.histone demethylase (PKDM8) / RNA biosynthesis.transcriptional regulation.transcription factor (JUMONJI)
	Prupe.5G029500	Prupe.5G029500.2	Prupe.5G029500.2.p		Calcium-binding EF-hand family protein	1.19303	0.00240701	Over	1 hour	not assigned.annotated
	Prupe.5G034400	Prupe.5G034400.1	Prupe.5G034400.1.p			1.39918	0.023609	Over	1 hour	not assigned.not annotated
	Prupe.5G035400	Prupe.5G035400.1	Prupe.5G035400.1.p	ATMYC2,JAI1,JIN1,MYC2,RD22BP1,ZBF1	Basic helix-loop-helix (bHLH) DNA-binding family protein	1.63287	1.73817e-11	Over	1 hour	RNA biosynthesis.transcriptional regulation.transcription factor (bHLH)
	Prupe.5G036300	Prupe.5G036300.5	Prupe.5G036300.5.p	ARL2,ATARLC1,HAL,TTN5	ADP-ribosylation factor family protein	7.29327	0.00183444	Over	1 hour	Cytoskeleton organisation.actin and tubulin folding.post-CCT Tubulin folding pathway.tubulin folding cofactor (ARL2) / Vesicle trafficking.Coat protein I (COPI) coatomer machinery.coat protein recruiting.ARF-GTPase
	Prupe.5G039600	Prupe.5G039600.1	Prupe.5G039600.1.p	LOL1	lsd one like 1	7.17875	0.0297917	Over	1 hour	Multi-process regulation.Programmed Cell Death (PCD) system.PCD regulatory protein (LSD/LOL)
	Prupe.5G052200	Prupe.5G052200.2	Prupe.5G052200.2.p		Protein kinase superfamily protein	1.20836	4.14266e-05	Over	1 hour	Protein modification.phosphorylation.TKL protein kinase superfamily.RLCK-VII receptor-like protein kinase families.receptor-like protein kinase (RLCK-VIIa)
	Prupe.5G060400	Prupe.5G060400.1	Prupe.5G060400.1.p	PLA-I{beta]2	alpha/beta-Hydrolases superfamily protein	1.81535	3.38383e-08	Over	1 hour	Lipid metabolism.lipid degradation.phospholipase activities.phospholipase A1 activities.phospholipase A1 (PC-PLA1)
	Prupe.5G065600	Prupe.5G065600.5	Prupe.5G065600.5.p		Exostosin family protein	3.45895	0.0488533	Over	1 hour	not assigned.annotated
	Prupe.5G079600	Prupe.5G079600.1	Prupe.5G079600.1.p		Protein of unknown function (DUF1442)	1.21633	1.12308e-08	Over	1 hour	not assigned.not annotated
	Prupe.5G079900	Prupe.5G079900.1	Prupe.5G079900.1.p			1.59248	0.0101652	Over	1 hour	not assigned.not annotated
	Prupe.5G089800	Prupe.5G089800.1	Prupe.5G089800.1.p			1.54544	2.38983e-14	Over	1 hour	not assigned.not annotated
	Prupe.5G090000	Prupe.5G090000.1	Prupe.5G090000.1.p	ATCBF2,CBF2,DREB1C,FTQ4	C-repeat/DRE binding factor 2	3.65517	4.22273e-07	Over	1 hour	RNA biosynthesis.transcriptional regulation.AP2/ERF transcription factor superfamily.transcription factor (DREB) / External stimuli response.temperature.cold response.ICE-CBF cold acclimation transcriptional cascade.transcription factor (CBF/DREB1)
	Prupe.5G090100	Prupe.5G090100.1	Prupe.5G090100.1.p	DDF1	Integrase-type DNA-binding superfamily protein	3.56282	1.95031e-22	Over	1 hour	RNA biosynthesis.transcriptional regulation.AP2/ERF transcription factor superfamily.transcription factor (DREB) /External stimuli response.temperature.cold response.ICE-CBF cold acclimation transcriptional cascade.transcription factor (CBF/DREB1)
	Prupe.5G090200	Prupe.5G090200.1	Prupe.5G090200.1.p	CBF4,DREB1D	C-repeat-binding factor 4	3.78022	1.96089e-06	Over	1 hour	RNA biosynthesis.transcriptional regulation.AP2/ERF transcription factor superfamily.transcription factor (DREB) / External stimuli response.temperature.cold response.ICE-CBF cold acclimation transcriptional cascade.transcription factor (CBF/DREB1)
	Prupe.5G090500	Prupe.5G090500.1	Prupe.5G090500.1.p	DDF1	Integrase-type DNA-binding superfamily protein	4.84109	9.32378e-17	Over	1 hour	RNA biosynthesis.transcriptional regulation.AP2/ERF transcription factor superfamily.transcription factor (DREB) / External stimuli response.temperature.cold response.ICE-CBF cold acclimation transcriptional cascade.transcription factor (CBF/DREB1)
	Prupe.5G094200	Prupe.5G094200.1	Prupe.5G094200.1.p	ATOSM34,OSM34	osmotin 34	1.12021	0.0173283	Over	1 hour	not assigned.annotated
	Prupe.5G097200	Prupe.5G097200.1	Prupe.5G097200.1.p			1.36873	0.00459374	Over	1 hour	not assigned.not annotated
	Prupe.5G097600	Prupe.5G097600.4	Prupe.5G097600.4.p	ATSR,SR	serine racemase	3.55378	0.00427662	Over	1 hour	Amino acid metabolism.biosynthesis.serine family.serine racemization.serine racemase
	Prupe.5G106200	Prupe.5G106200.1	Prupe.5G106200.1.p	ACS6,ATACS6	1-aminocyclopropane-1-carboxylic acid (acc) synthase 6	1.64563	0.00960887	Over	1 hour	Phytohormone action.ethylene.biosynthesis.1-aminocyclopropane-1-carboxylate (ACC) synthase
	Prupe.5G107500	Prupe.5G107500.1	Prupe.5G107500.1.p		Late embryogenesis abundant (LEA) hydroxyproline-rich glycoprotein family	1.47221	0.0276479	Over	1 hour	not assigned.not annotated
	Prupe.5G108700	Prupe.5G108700.1	Prupe.5G108700.1.p		Late embryogenesis abundant (LEA) hydroxyproline-rich glycoprotein family	2.01618	5.32803e-05	Over	1 hour	not assigned.not annotated
	Prupe.5G109000	Prupe.5G109000.1	Prupe.5G109000.1.p		Late embryogenesis abundant (LEA) hydroxyproline-rich glycoprotein family	1.37067	7.25212e-05	Over	1 hour	not assigned.not annotated
	Prupe.5G109100	Prupe.5G109100.1	Prupe.5G109100.1.p		Late embryogenesis abundant (LEA) hydroxyproline-rich glycoprotein family	1.29416	0.00113447	Over	1 hour	not assigned.not annotated
	Prupe.5G109200	Prupe.5G109200.1	Prupe.5G109200.1.p		Late embryogenesis abundant (LEA) hydroxyproline-rich glycoprotein family	1.78283	2.79647e-08	Over	1 hour	not assigned.not annotated
	Prupe.5G109300	Prupe.5G109300.1	Prupe.5G109300.1.p	LysoPL2	lysophospholipase 2	1.10652	1.69424e-05	Over	1 hour	Cell wall organisation.lignin.monolignol biosynthesis.caffeoyl shikimate esterase (CSE)
	Prupe.5G109600	Prupe.5G109600.1	Prupe.5G109600.1.p		Late embryogenesis abundant (LEA) hydroxyproline-rich glycoprotein family	1.14313	0.0311007	Over	1 hour	not assigned.not annotated
	Prupe.5G114500	Prupe.5G114500.1	Prupe.5G114500.1.p			1.48462	0.00868549	Over	1 hour	not assigned.not annotated
	Prupe.5G116000	Prupe.5G116000.1	Prupe.5G116000.1.p			1.39074	2.53878e-05	Over	1 hour	not assigned.not annotated
	Prupe.5G117000	Prupe.5G117000.1	Prupe.5G117000.1.p	ATWRKY53,WRKY53	WRKY family transcription factor	1.71241	0.000213978	Over	1 hour	RNA biosynthesis.transcriptional regulation.transcription factor (WRKY)
	Prupe.5G117000	Prupe.5G117000.3	Prupe.5G117000.3.p	ATWRKY53,WRKY53	WRKY family transcription factor	1.85537	0.001445	Over	1 hour	RNA biosynthesis.transcriptional regulation.transcription factor (WRKY)
	Prupe.5G123100	Prupe.5G123100.1	Prupe.5G123100.1.p		Glutaredoxin family protein	1.88103	8.96542e-44	Over	1 hour	Cytoskeleton organisation.plastid movement.actin filament-bundling factor (THRUMIN)
	Prupe.5G123200	Prupe.5G123200.2	Prupe.5G123200.2.p		DCD (Development and Cell Death) domain protein	1.39084	8.10123e-05	Over	1 hour	not assigned.annotated
	Prupe.5G129000	Prupe.5G129000.1	Prupe.5G129000.1.p			2.3306	1.9658e-16	Over	1 hour	not assigned.not annotated
	Prupe.5G133100	Prupe.5G133100.1	Prupe.5G133100.1.p			2.1979	4.366e-15	Over	1 hour	not assigned.not annotated
	Prupe.5G133200	Prupe.5G133200.1	Prupe.5G133200.1.p			2.2867	4.63858e-19	Over	1 hour	not assigned.not annotated
	Prupe.5G133300	Prupe.5G133300.1	Prupe.5G133300.1.p	CP5	Polyketide cyclase/dehydrase and lipid transport superfamily protein	1.31595	1.57739e-07	Over	1 hour	not assigned.not annotated
	Prupe.5G144800	Prupe.5G144800.1	Prupe.5G144800.1.p		ARM repeat superfamily protein	1.04255	4.42308e-16	Over	1 hour	not assigned.annotated
	Prupe.5G150500	Prupe.5G150500.4	Prupe.5G150500.4.p		secE/sec61-gamma protein transport protein	8.04839	0.00203739	Over	1 hour	Protein translocation.endoplasmic reticulum.co-translational insertion system.Sec61 subcomplex.subunit gamma
	Prupe.5G152700	Prupe.5G152700.1	Prupe.5G152700.1.p	CML38	calmodulin-like 38	3.23009	7.21074e-22	Over	1 hour	not assigned.annotated
	Prupe.5G166200	Prupe.5G166200.2	Prupe.5G166200.2.p		Octicosapeptide/Phox/Bem1p family protein	1.31572	4.02049e-06	Over	1 hour	not assigned.not annotated
	Prupe.5G172800	Prupe.5G172800.2	Prupe.5G172800.2.p	ATPANK2,PANK2	pantothenate kinase 2	5.61845	0.00526849	Over	1 hour	Coenzyme metabolism.coenzyme A biosynthesis.pantothenate kinase
	Prupe.5G173800	Prupe.5G173800.2	Prupe.5G173800.2.p		Protein of unknown function (DUF1645)	1.11867	0.0142284	Over	1 hour	not assigned.not annotated
	Prupe.5G175200	Prupe.5G175200.1	Prupe.5G175200.1.p		basic helix-loop-helix (bHLH) DNA-binding superfamily protein	2.18439	0.00605443	Over	1 hour	not assigned.annotated
	Prupe.5G175800	Prupe.5G175800.1	Prupe.5G175800.1.p		ARM repeat superfamily protein	2.13974	3.40395e-20	Over	1 hour	Protein homeostasis.ubiquitin-proteasome system.ubiquitin-fold protein conjugation.ubiquitin conjugation (ubiquitylation).ubiquitin-ligase E3 activities.U-Box E3 ligase activities.E3 ubiquitin ligase (PUB)
	Prupe.5G179600	Prupe.5G179600.1	Prupe.5G179600.1.p			1.61787	2.46759e-11	Over	1 hour	not assigned.not annotated
	Prupe.5G198700	Prupe.5G198700.1	Prupe.5G198700.1.p		zinc finger (C3HC4-type RING finger) family protein	1.3567	6.76044e-09	Over	1 hour	Protein homeostasis.proteolysis.serine-type peptidase activities.S16-class protease (LON)
	Prupe.5G202800	Prupe.5G202800.1	Prupe.5G202800.1.p		UDP-glucose 6-dehydrogenase family protein	1.54261	0.0107495	Over	1 hour	Carbohydrate metabolism.nucleotide sugar biosynthesis.UDP-D-glucuronic acid biosynthesis.UDP-D-glucose 6-dehydrogenase
	Prupe.5G208700	Prupe.5G208700.1	Prupe.5G208700.1.p	ER-ANT1	endoplasmic reticulum-adenine nucleotide transporter 1	7.54596	0.000170793	Over	1 hour	Solute transport.carrier-mediated transport.solute transporter (MTCC)
	Prupe.5G214400	Prupe.5G214400.1	Prupe.5G214400.1.p	NF-YB13	nuclear factor Y, subunit B13	1.48045	0.00228973	Over	1 hour	RNA biosynthesis.RNA polymerase II-dependent transcription.transcription initiation.TATA box-binding protein (TBP) regulation.NC2 regulator heterodimer.component beta
	Prupe.5G229000	Prupe.5G229000.1	Prupe.5G229000.1.p		S-adenosyl-L-methionine-dependent methyltransferases superfamily protein	1.29179	0.00088521	Over	1 hour	Enzyme classification.EC_2 transferases.EC_2.1 transferase transferring one-carbon group
	Prupe.5G233900	Prupe.5G233900.2	Prupe.5G233900.2.p	AtPOT1b	Nucleic acid-binding, OB-fold-like protein	9.5322	0.000892751	Over	1 hour	Cell cycle organisation.DNA replication.telomere replication.telomerase ribonucleoprotein complex.associated component POT
	Prupe.5G235900	Prupe.5G235900.1	Prupe.5G235900.1.p	atnudt4,NUDT4	nudix hydrolase homolog 4	3.11062	1.49777e-07	Over	1 hour	not assigned.annotated
	Prupe.5G236400	Prupe.5G236400.1	Prupe.5G236400.1.p	ATNFXL1,NFXL1	NF-X-like 1	1.01079	1.7477e-10	Over	1 hour	RNA biosynthesis.transcriptional regulation.transcriptional repression.transcriptional repressor (NF-X1)
	Prupe.5G237400	Prupe.5G237400.1	Prupe.5G237400.1.p		ARM repeat superfamily protein	2.81968	2.5982e-09	Over	1 hour	not assigned.annotated
	Prupe.5G237800	Prupe.5G237800.1	Prupe.5G237800.1.p	ATPAP3,PAP3	purple acid phosphatase 3	1.24738	6.32976e-08	Over	1 hour	not assigned.annotated
	Prupe.6G005400	Prupe.6G005400.1	Prupe.6G005400.1.p		calmodulin-binding family protein	1.63005	3.31636e-07	Over	1 hour	not assigned.annotated
	Prupe.6G031100	Prupe.6G031100.1	Prupe.6G031100.1.p		Copper transport protein family	1.74728	2.5952e-05	Over	1 hour	not assigned.not annotated
	Prupe.6G031100	Prupe.6G031100.2	Prupe.6G031100.2.p		Copper transport protein family	1.29901	0.0471756	Over	1 hour	not assigned.not annotated
	Prupe.6G037400	Prupe.6G037400.1	Prupe.6G037400.1.p		Protein of unknown function (DUF607)	1.81313	4.3209e-06	Over	1 hour	Solute transport.channels.MCU calcium uniporter complex.channel component MCU
	Prupe.6G037400	Prupe.6G037400.2	Prupe.6G037400.2.p		Protein of unknown function (DUF607)	1.91201	1.74177e-06	Over	1 hour	Solute transport.channels.MCU calcium uniporter complex.channel component MCU
	Prupe.6G039200	Prupe.6G039200.1	Prupe.6G039200.1.p	RPT2	Phototropic-responsive NPH3 family protein	2.57419	1.52682e-05	Over	1 hour	not assigned.annotated
	Prupe.6G043300	Prupe.6G043300.1	Prupe.6G043300.1.p	CIPK11,PKS5,SIP4,SNRK3.22	SOS3-interacting protein 4	1.21542	1.51447e-05	Over	1 hour	Protein modification.phosphorylation.CAMK protein kinase superfamily.SNF1-related protein kinase (SnRK3)
	Prupe.6G054400	Prupe.6G054400.1	Prupe.6G054400.1.p	MAPKKK14	mitogen-activated protein kinase kinase kinase 14	2.68005	1.00447e-28	Over	1 hour	Protein modification.phosphorylation.STE protein kinase superfamily.protein kinase (MAP3K-MEKK)
	Prupe.6G054500	Prupe.6G054500.1	Prupe.6G054500.1.p		Protein phosphatase 2C family protein	2.52564	8.09191e-09	Over	1 hour	not assigned.annotated
	Prupe.6G059600	Prupe.6G059600.2	Prupe.6G059600.2.p		Tetratricopeptide repeat (TPR)-like superfamily protein	1.60022	5.56548e-07	Over	1 hour	not assigned.not annotated
	Prupe.6G060500	Prupe.6G060500.1	Prupe.6G060500.1.p	JOSL	JOSEPHIN-like protein	1.14974	4.35367e-12	Over	1 hour	not assigned.annotated
	Prupe.6G066300	Prupe.6G066300.1	Prupe.6G066300.1.p		HSP20-like chaperones superfamily protein	1.25449	0.0295636	Over	1 hour	Protein homeostasis.protein quality control.smallHsp holdase chaperone activities.class-C-I protein
	Prupe.6G070800	Prupe.6G070800.2	Prupe.6G070800.2.p	RCA	rubisco activase	5.16929	0.0365414	Over	1 hour	Photosynthesis.calvin cycle.ribulose-1,5-bisphosphat carboxylase/oxygenase (RuBisCo) activity.RuBisCo regulation.ATP-dependent activase (RCA)
	Prupe.6G071800	Prupe.6G071800.1	Prupe.6G071800.1.p		zinc finger (C3HC4-type RING finger) family protein	2.21372	2.55047e-07	Over	1 hour	not assigned.annotated
	Prupe.6G072300	Prupe.6G072300.1	Prupe.6G072300.1.p			2.37637	1.98989e-15	Over	1 hour	Cell cycle organisation.cell cycle control.cyclin-dependent regulation.cyclin-dependent protein kinase inhibitor activities.inhibitor (SIM)
	Prupe.6G080000	Prupe.6G080000.1	Prupe.6G080000.1.p			1.14909	0.0375074	Over	1 hour	not assigned.not annotated
	Prupe.6G084100	Prupe.6G084100.1	Prupe.6G084100.1.p		C2H2-type zinc finger family protein	2.75013	1.46148e-16	Over	1 hour	RNA biosynthesis.transcriptional regulation.transcription factor (C2H2-ZF)
	Prupe.6G086700	Prupe.6G086700.1	Prupe.6G086700.1.p	ATEXO70H2,EXO70H2	exocyst subunit exo70 family protein H2	1.67146	2.35086e-05	Over	1 hour	Vesicle trafficking.target membrane tethering.Exocyst complex.component EXO70
	Prupe.6G086800	Prupe.6G086800.1	Prupe.6G086800.1.p	KCS3	3-ketoacyl-CoA synthase 3	1.21698	2.78781e-07	Over	1 hour	Lipid metabolism.fatty acid biosynthesis.endoplasmic reticulum-localized fatty acid elongase (FAE) system.fatty acid elongation complex.3-ketoacyl-CoA synthase (KCS)
	Prupe.6G090800	Prupe.6G090800.1	Prupe.6G090800.1.p			1.02324	0.0133453	Over	1 hour	not assigned.not annotated
	Prupe.6G093600	Prupe.6G093600.2	Prupe.6G093600.2.p			9.39686	0.0488752	Over	1 hour	not assigned.not annotated
	Prupe.6G121700	Prupe.6G121700.1	Prupe.6G121700.1.p	AGL103	AGAMOUS-like 103	1.10894	2.40284e-06	Over	1 hour	RNA biosynthesis.transcriptional regulation.transcription factor (MADS/AGL)
	Prupe.6G129100	Prupe.6G129100.2	Prupe.6G129100.2.p	bZIP21,TGA9	bZIP transcription factor family protein	7.55073	0.00440283	Over	1 hour	RNA biosynthesis.transcriptional regulation.bZIP transcription factor superfamily.transcription factor (bZIP) / RNA biosynthesis.transcriptional regulation.bZIP transcription factor superfamily.TGA transcription factor activity.transcription factor (TGA)
	Prupe.6G129600	Prupe.6G129600.1	Prupe.6G129600.1.p			2.451	0.0224511	Over	1 hour	not assigned.annotated
	Prupe.6G134400	Prupe.6G134400.1	Prupe.6G134400.1.p	anac090,NAC090	NAC domain containing protein 90	3.55947	2.22467e-11	Over	1 hour	RNA biosynthesis.transcriptional regulation.transcription factor (NAC)
	Prupe.6G139000	Prupe.6G139000.1	Prupe.6G139000.1.p			1.21281	1.64196e-05	Over	1 hour	not assigned.not annotated
	Prupe.6G139200	Prupe.6G139200.1	Prupe.6G139200.1.p		Polynucleotidyl transferase, ribonuclease H-like superfamily protein	1.47521	4.62551e-08	Over	1 hour	RNA processing.RNA surveillance.mRNA deadenylation-dependent decay.mRNA deadenylation.CCR4-NOT complex.deadenylase component CAF1
	Prupe.6G148600	Prupe.6G148600.1	Prupe.6G148600.1.p			2.31048	1.46853e-15	Over	1 hour	not assigned.not annotated
	Prupe.6G153300	Prupe.6G153300.1	Prupe.6G153300.1.p		Disease resistance protein (CC-NBS-LRR class) family	1.74536	1.19402e-14	Over	1 hour	not assigned.annotated
	Prupe.6G153400	Prupe.6G153400.1	Prupe.6G153400.1.p		Disease resistance protein (CC-NBS-LRR class) family	1.96332	3.72279e-05	Over	1 hour	not assigned.annotated
	Prupe.6G155500	Prupe.6G155500.1	Prupe.6G155500.1.p		Late embryogenesis abundant (LEA) hydroxyproline-rich glycoprotein family	1.64846	0.000103798	Over	1 hour	not assigned.annotated
	Prupe.6G161200	Prupe.6G161200.1	Prupe.6G161200.1.p			1.48924	3.6289e-26	Over	1 hour	not assigned.not annotated
	Prupe.6G169800	Prupe.6G169800.1	Prupe.6G169800.1.p			2.19025	0.04742	Over	1 hour	not assigned.not annotated
	Prupe.6G180500	Prupe.6G180500.1	Prupe.6G180500.1.p	ATIPS2,ATMIPS2,MIPS2	myo-inositol-1-phosphate synthase 2	1.14616	0.014873	Over	1 hour	Carbohydrate metabolism.nucleotide sugar biosynthesis.UDP-D-glucuronic acid biosynthesis.myo-inositol oxidation pathway (MIOP).myo-inositol-1-phosphate synthase
	Prupe.6G184700	Prupe.6G184700.1	Prupe.6G184700.1.p			1.024	1.17776e-05	Over	1 hour	not assigned.not annotated
	Prupe.6G185100	Prupe.6G185100.1	Prupe.6G185100.1.p			1.19247	0.00832225	Over	1 hour	not assigned.not annotated
	Prupe.6G185200	Prupe.6G185200.1	Prupe.6G185200.1.p			1.75556	0.00117934	Over	1 hour	not assigned.not annotated
	Prupe.6G185300	Prupe.6G185300.1	Prupe.6G185300.1.p			1.19139	0.0200008	Over	1 hour	not assigned.not annotated
	Prupe.6G185400	Prupe.6G185400.1	Prupe.6G185400.1.p			2.99042	2.65786e-10	Over	1 hour	not assigned.not annotated
	Prupe.6G185500	Prupe.6G185500.1	Prupe.6G185500.1.p			1.73428	0.0406517	Over	1 hour	not assigned.not annotated
	Prupe.6G185600	Prupe.6G185600.1	Prupe.6G185600.1.p			1.78517	1.65477e-05	Over	1 hour	not assigned.not annotated
	Prupe.6G185800	Prupe.6G185800.1	Prupe.6G185800.1.p		Exostosin family protein	1.46213	1.56833e-06	Over	1 hour	not assigned.annotated
	Prupe.6G186800	Prupe.6G186800.3	Prupe.6G186800.3.p	ASN2	asparagine synthetase 2	8.40992	0.0461804	Over	1 hour	Amino acid metabolism.biosynthesis.aspartate family.asparagine.glutamine-dependent asparagine synthetase
	Prupe.6G195100	Prupe.6G195100.1	Prupe.6G195100.1.p	ATL6	RING/U-box superfamily protein	1.47897	9.86043e-07	Over	1 hour	Protein homeostasis.ubiquitin-proteasome system.ubiquitin-fold protein conjugation.ubiquitin conjugation (ubiquitylation).ubiquitin-ligase E3 activities.RING-domain E3 ligase activities.RING-H2-class E3 ligase
	Prupe.6G206800	Prupe.6G206800.1	Prupe.6G206800.1.p	ATCAD6,CAD6	cinnamyl alcohol dehydrogenase 6	1.52842	0.00134504	Over	1 hour	Enzyme classification.EC_1 oxidoreductases.EC_1.1 oxidoreductase acting on CH-OH group of donor
	Prupe.6G212900	Prupe.6G212900.1	Prupe.6G212900.1.p			1.86681	1.98331e-27	Over	1 hour	not assigned.not annotated
	Prupe.6G223300	Prupe.6G223300.1	Prupe.6G223300.1.p			1.57869	3.81397e-10	Over	1 hour	RNA biosynthesis.RNA polymerase II-dependent transcription.SAGA transcription co-activator complex.SPT recruitment module.component ADA1
	Prupe.6G224700	Prupe.6G224700.1	Prupe.6G224700.1.p		Late embryogenesis abundant protein, group 6	1.06836	0.00739019	Over	1 hour	not assigned.not annotated
	Prupe.6G227100	Prupe.6G227100.1	Prupe.6G227100.1.p	CYP81D8	cytochrome P450, family 81, subfamily D, polypeptide 8	1.89153	0.0181821	Over	1 hour	Enzyme classification.EC_1 oxidoreductases.EC_1.14 oxidoreductase acting on paired donor with incorporation or reduction of molecular oxygen
	Prupe.6G229800	Prupe.6G229800.1	Prupe.6G229800.1.p	SKIP2,VFB4	SKP1/ASK1-interacting protein 2	1.23893	1.10276e-09	Over	1 hour	Protein homeostasis.ubiquitin-proteasome system.ubiquitin-fold protein conjugation.Cullin-based ubiquitylation complexes.SKP1-CUL1-FBX (SCF) E3 ligase complexes.F-BOX substrate adaptor components.component FBX
	Prupe.6G232300	Prupe.6G232300.1	Prupe.6G232300.1.p		SAUR-like auxin-responsive protein family	2.03128	1.39416e-07	Over	1 hour	not assigned.not annotated
	Prupe.6G234400	Prupe.6G234400.1	Prupe.6G234400.1.p		Protein kinase superfamily protein	1.6776	0.0342891	Over	1 hour	Protein modification.phosphorylation.TKL protein kinase superfamily.RLCK-VII receptor-like protein kinase families.receptor-like protein kinase (RLCK-VIIa) / External stimuli response.pathogen.pattern-triggered immunity (PTI) network.bacterial elicitor response.protein kinase (PCRK)
	Prupe.6G235400	Prupe.6G235400.1	Prupe.6G235400.1.p	ATPAL1,PAL1	PHE ammonia lyase 1	1.5306	0.0142706	Over	1 hour	Secondary metabolism.phenolics.p-coumaroyl-CoA biosynthesis.phenylalanine ammonia lyase activity.phenylalanine ammonia lyase (PAL)
	Prupe.6G236700	Prupe.6G236700.1	Prupe.6G236700.1.p		Protein of unknown function, DUF584	1.33372	1.13474e-05	Over	1 hour	not assigned.not annotated
	Prupe.6G236900	Prupe.6G236900.1	Prupe.6G236900.1.p			1.61972	4.4693e-06	Over	1 hour	not assigned.not annotated
	Prupe.6G247200	Prupe.6G247200.1	Prupe.6G247200.1.p	ATEXO70H4,EXO70H4	exocyst subunit exo70 family protein H4	1.26016	0.00159149	Over	1 hour	Vesicle trafficking.target membrane tethering.Exocyst complex.component EXO70
	Prupe.6G249300	Prupe.6G249300.1	Prupe.6G249300.1.p		C2H2-type zinc finger family protein	3.05928	2.27057e-09	Over	1 hour	RNA biosynthesis.transcriptional regulation.transcription factor (C2H2-ZF)
	Prupe.6G254600	Prupe.6G254600.3	Prupe.6G254600.3.p	PLL4	poltergeist like 4	9.01395	0.0164398	Over	1 hour	Protein modification.phosphorylation.serine/threonine protein phosphatase superfamily.PPM/PP2C Mn/Mg-dependent phosphatase families.clade C phosphatase
	Prupe.6G258400	Prupe.6G258400.1	Prupe.6G258400.1.p		zinc finger (C3HC4-type RING finger) family protein	2.22008	8.67587e-19	Over	1 hour	not assigned.annotated
	Prupe.6G261000	Prupe.6G261000.1	Prupe.6G261000.1.p			1.19555	2.65006e-05	Over	1 hour	not assigned.not annotated
	Prupe.6G266600	Prupe.6G266600.1	Prupe.6G266600.1.p	AtUGT85A7,UGT85A7	UDP-glucosyl transferase 85A7	1.48235	0.00036981	Over	1 hour	Enzyme classification.EC_2 transferases.EC_2.4 glycosyltransferase
	Prupe.6G278600	Prupe.6G278600.1	Prupe.6G278600.1.p		Homeodomain-like superfamily protein	1.39603	0.00113447	Over	1 hour	RNA biosynthesis.transcriptional regulation.transcription factor (Trihelix)
	Prupe.6G278700	Prupe.6G278700.1	Prupe.6G278700.1.p	ACI1	ALC-interacting protein 1	1.10891	0.0330571	Over	1 hour	not assigned.not annotated
	Prupe.6G282700	Prupe.6G282700.1	Prupe.6G282700.1.p	LECRKA4.2	lectin receptor kinase a4.1	1.81482	6.87624e-05	Over	1 hour	Protein modification.phosphorylation.TKL protein kinase superfamily.protein kinase (L-lectin)
	Prupe.6G285700	Prupe.6G285700.1	Prupe.6G285700.1.p		methyltransferases	1.43572	1.85909e-15	Over	1 hour	not assigned.not annotated
	Prupe.6G286000	Prupe.6G286000.1	Prupe.6G286000.1.p	ATWRKY33,WRKY33	WRKY DNA-binding protein 33	1.42633	0.000168952	Over	1 hour	RNA biosynthesis.transcriptional regulation.transcription factor (WRKY) / External stimuli response.pathogen.defense mechanisms.WRKY33-dependent plant immunity.transcription factor (WRKY33)
	Prupe.6G287500	Prupe.6G287500.1	Prupe.6G287500.1.p		Protein of unknown function (DUF567)	1.59332	2.8354e-07	Over	1 hour	not assigned.annotated
	Prupe.6G289800	Prupe.6G289800.1	Prupe.6G289800.1.p			1.10795	0.0439701	Over	1 hour	not assigned.not annotated
	Prupe.6G293400	Prupe.6G293400.12	Prupe.6G293400.12.p	HSI2-L1,HSL1,VAL2	HSI2-like 1	1.36349	0.0402108	Over	1 hour	RNA biosynthesis.transcriptional regulation.B3 transcription factor superfamily.transcription factor (LAV-VAL)
	Prupe.6G298900	Prupe.6G298900.1	Prupe.6G298900.1.p	CML42	calmodulin like 42	1.12152	0.0488533	Over	1 hour	not assigned.annotated
	Prupe.6G300100	Prupe.6G300100.1	Prupe.6G300100.1.p		Protein of unknown function (DUF567)	1.5123	6.92747e-06	Over	1 hour	not assigned.annotated
	Prupe.6G309400	Prupe.6G309400.2	Prupe.6G309400.2.p	AtGolS2,GolS2	galactinol synthase 2	1.13061	0.000208499	Over	1 hour	Carbohydrate metabolism.oligosaccharide metabolism.galactinol synthase
	Prupe.6G310500	Prupe.6G310500.1	Prupe.6G310500.1.p		VQ motif-containing protein	1.13386	3.84671e-29	Over	1 hour	not assigned.annotated
	Prupe.6G322500	Prupe.6G322500.2	Prupe.6G322500.2.p	(AT)SRC2,SRC2	soybean gene regulated by cold-2	1.68715	7.53629e-07	Over	1 hour	not assigned.annotated
	Prupe.6G322600	Prupe.6G322600.1	Prupe.6G322600.1.p	(AT)SRC2,SRC2	soybean gene regulated by cold-2	1.21895	1.54046e-05	Over	1 hour	not assigned.annotated
	Prupe.6G329500	Prupe.6G329500.1	Prupe.6G329500.1.p	ATL6	RING/U-box superfamily protein	1.34613	3.08469e-94	Over	1 hour	Protein homeostasis.ubiquitin-proteasome system.ubiquitin-fold protein conjugation.ubiquitin conjugation (ubiquitylation).ubiquitin-ligase E3 activities.RING-domain E3 ligase activities.RING-H2-class E3 ligase
	Prupe.6G355500	Prupe.6G355500.1	Prupe.6G355500.1.p	ATPUB9,PUB9	plant U-box 9	1.00844	1.66858e-07	Over	1 hour	Protein homeostasis.ubiquitin-proteasome system.ubiquitin-fold protein conjugation.ubiquitin conjugation (ubiquitylation).ubiquitin-ligase E3 activities.U-Box E3 ligase activities.E3 ubiquitin ligase (PUB)
	Prupe.7G016500	Prupe.7G016500.1	Prupe.7G016500.1.p		Peroxidase superfamily protein	2.13725	0.0342704	Over	1 hour	not assigned.annotated
	Prupe.7G022300	Prupe.7G022300.1	Prupe.7G022300.1.p		Peroxisomal membrane 22 kDa (Mpv17/PMP22) family protein	7.29534	0.0343667	Over	1 hour	not assigned.not annotated
	Prupe.7G036500	Prupe.7G036500.7	Prupe.7G036500.7.p		Peptide chain release factor 1	1.06934	0.00590301	Over	1 hour	Protein biosynthesis.organelle machinery.translation termination.peptide chain release factor (PrfA)
	Prupe.7G043200	Prupe.7G043200.1	Prupe.7G043200.1.p		Glutaredoxin family protein	1.23361	2.63249e-07	Over	1 hour	not assigned.annotated
	Prupe.7G053600	Prupe.7G053600.3	Prupe.7G053600.3.p		Transducin/WD40 repeat-like superfamily protein	10.1156	1.96536e-06	Over	1 hour	Protein biosynthesis.ribosome biogenesis.large ribosomal subunit (LSU).LSU processome.pre-60S ribosomal subunit nuclear assembly.PES-BOP1-WDR12 (PeBoW) complex.component BOP1
	Prupe.7G058900	Prupe.7G058900.1	Prupe.7G058900.1.p			1.1508	0.0101652	Over	1 hour	not assigned.not annotated
	Prupe.7G059300	Prupe.7G059300.2	Prupe.7G059300.2.p		oxidoreductase, zinc-binding dehydrogenase family protein	8.09416	0.00150659	Over	1 hour	Enzyme classification.EC_1 oxidoreductases.EC_1.3 oxidoreductase acting on CH-CH group of donor
	Prupe.7G061500	Prupe.7G061500.1	Prupe.7G061500.1.p			2.04329	3.53314e-08	Over	1 hour	not assigned.not annotated
	Prupe.7G064000	Prupe.7G064000.2	Prupe.7G064000.2.p	AtSIP2,SIP2	seed imbibition 2	9.60569	0.00143952	Over	1 hour	Carbohydrate metabolism.oligosaccharide metabolism.raffinose alpha-galactosidase
	Prupe.7G068100	Prupe.7G068100.1	Prupe.7G068100.1.p			1.44832	0.00833297	Over	1 hour	not assigned.not annotated
	Prupe.7G093500	Prupe.7G093500.1	Prupe.7G093500.1.p	AT-SYR1,ATSYP121,ATSYR1,PEN1,SYP121,SYR1	syntaxin of plants 121	1.09961	5.76673e-08	Over	1 hour	Vesicle trafficking.SNARE target membrane recognition and fusion complexes.Qa-type SNARE components.SYP1-group component
	Prupe.7G094000	Prupe.7G094000.1	Prupe.7G094000.1.p	PUB23	plant U-box 23	2.61362	7.14836e-05	Over	1 hour	not assigned.annotated
	Prupe.7G098700	Prupe.7G098700.1	Prupe.7G098700.1.p		Polynucleotidyl transferase, ribonuclease H-like superfamily protein	1.05045	0.00288819	Over	1 hour	RNA processing.RNA surveillance.mRNA deadenylation-dependent decay.mRNA deadenylation.CCR4-NOT complex.deadenylase component CAF1
	Prupe.7G100900	Prupe.7G100900.1	Prupe.7G100900.1.p		F-box family protein	1.18981	2.2871e-06	Over	1 hour	not assigned.annotated
	Prupe.7G110700	Prupe.7G110700.2	Prupe.7G110700.2.p			1.87071	2.40041e-06	Over	1 hour	not assigned.annotated
	Prupe.7G117600	Prupe.7G117600.1	Prupe.7G117600.1.p		O-acyltransferase (WSD1-like) family protein	1.61873	0.0275332	Over	1 hour	not assigned.annotated
	Prupe.7G119300	Prupe.7G119300.1	Prupe.7G119300.1.p			1.72887	0.0264544	Over	1 hour	not assigned.not annotated
	Prupe.7G123200	Prupe.7G123200.1	Prupe.7G123200.1.p		RING/U-box superfamily protein	1.90732	1.95708e-05	Over	1 hour	Protein homeostasis.ubiquitin-proteasome system.ubiquitin-fold protein conjugation.ubiquitin conjugation (ubiquitylation).ubiquitin-ligase E3 activities.RING-domain E3 ligase activities.RING-H2-class E3 ligase
	Prupe.7G124000	Prupe.7G124000.1	Prupe.7G124000.1.p	UGT73D1	UDP-glucosyl transferase 73D1	1.16369	0.00183524	Over	1 hour	Enzyme classification.EC_2 transferases.EC_2.4 glycosyltransferase
	Prupe.7G124200	Prupe.7G124200.1	Prupe.7G124200.1.p	DOGT1,UGT73C5	don-glucosyltransferase 1	1.21484	0.00940142	Over	1 hour	Enzyme classification.EC_2 transferases.EC_2.4 glycosyltransferase
	Prupe.7G134500	Prupe.7G134500.1	Prupe.7G134500.1.p		Calcium-binding EF-hand family protein	1.23889	0.00125471	Over	1 hour	not assigned.annotated
	Prupe.7G141200	Prupe.7G141200.1	Prupe.7G141200.1.p	ATMES3,MES3	methyl esterase 3	1.49431	0.0271523	Over	1 hour	not assigned.annotated
	Prupe.7G146200	Prupe.7G146200.1	Prupe.7G146200.1.p			1.28846	0.00251717	Over	1 hour	not assigned.not annotated
	Prupe.7G156900	Prupe.7G156900.1	Prupe.7G156900.1.p	ATCOAD,COAD	4-phosphopantetheine adenylyltransferase	2.53823	0.00651328	Over	1 hour	Coenzyme metabolism.coenzyme A biosynthesis.phosphopantetheine adenylyl transferase
	Prupe.7G160800	Prupe.7G160800.2	Prupe.7G160800.2.p	B1,BCH1,BETA-OHASE 1,chy1	beta-hydroxylase 1	1.23461	0.0302839	Over	1 hour	not assigned.annotated
	Prupe.7G162200	Prupe.7G162200.2	Prupe.7G162200.2.p	ATFOLT1,FOLT1	folate transporter 1	1.1696	0.00369267	Over	1 hour	Solute transport.carrier-mediated transport.solute transporter (MTCC)
	Prupe.7G174700	Prupe.7G174700.1	Prupe.7G174700.1.p		RING/U-box superfamily protein	1.16159	0.00369361	Over	1 hour	not assigned.annotated
	Prupe.7G187000	Prupe.7G187000.1	Prupe.7G187000.1.p	HMG1,HMGR1	hydroxy methylglutaryl CoA reductase 1	1.14505	5.7342e-10	Over	1 hour	Secondary metabolism.terpenoids.mevalonate pathway.3-hydroxy-3-methylglutaryl-CoA reductase
	Prupe.7G187100	Prupe.7G187100.1	Prupe.7G187100.1.p			2.78211	3.23158e-07	Over	1 hour	not assigned.not annotated
	Prupe.7G194400	Prupe.7G194400.1	Prupe.7G194400.1.p		Integrase-type DNA-binding superfamily protein	3.76542	1.06184e-09	Over	1 hour	RNA biosynthesis.transcriptional regulation.AP2/ERF transcription factor superfamily.transcription factor (DREB)
	Prupe.7G197400	Prupe.7G197400.1	Prupe.7G197400.1.p			1.1844	0.000463419	Over	1 hour	not assigned.not annotated
	Prupe.7G205200	Prupe.7G205200.1	Prupe.7G205200.1.p			2.7926	9.02475e-07	Over	1 hour	not assigned.annotated
	Prupe.7G205500	Prupe.7G205500.1	Prupe.7G205500.1.p		UDP-Glycosyltransferase superfamily protein	1.30884	1.72263e-08	Over	1 hour	Enzyme classification.EC_2 transferases.EC_2.4 glycosyltransferase
	Prupe.7G206600	Prupe.7G206600.1	Prupe.7G206600.1.p	EDA39	calmodulin-binding family protein	2.02506	3.48661e-06	Over	1 hour	not assigned.annotated
	Prupe.7G217700	Prupe.7G217700.1	Prupe.7G217700.1.p	PFN3,PRF3	profilin 3	1.29155	1.82044e-05	Over	1 hour	Cytoskeleton organisation.microfilament network.actin polymerisation.profilin actin nucleation protein
	Prupe.7G217700	Prupe.7G217700.2	Prupe.7G217700.2.p	PFN3,PRF3	profilin 3	1.39034	0.000139954	Over	1 hour	Cytoskeleton organisation.microfilament network.actin polymerisation.profilin actin nucleation protein
	Prupe.7G222700	Prupe.7G222700.1	Prupe.7G222700.1.p	TINY2	Integrase-type DNA-binding superfamily protein	1.40309	0.0389456	Over	1 hour	RNA biosynthesis.transcriptional regulation.AP2/ERF transcription factor superfamily.transcription factor (DREB)
	Prupe.7G229500	Prupe.7G229500.1	Prupe.7G229500.1.p	AGP16,ATAGP16	arabinogalactan protein 16	1.45894	7.64021e-05	Over	1 hour	not assigned.not annotated
	Prupe.7G236700	Prupe.7G236700.1	Prupe.7G236700.1.p	KCS11	3-ketoacyl-CoA synthase 11	1.14274	1.47251e-08	Over	1 hour	Lipid metabolism.fatty acid biosynthesis.endoplasmic reticulum-localized fatty acid elongase (FAE) system.fatty acid elongation complex.3-ketoacyl-CoA synthase (KCS)
	Prupe.7G250600	Prupe.7G250600.1	Prupe.7G250600.1.p		Late embryogenesis abundant (LEA) hydroxyproline-rich glycoprotein family	2.29542	3.99468e-09	Over	1 hour	not assigned.not annotated
	Prupe.7G254800	Prupe.7G254800.1	Prupe.7G254800.1.p			1.858	0.0109082	Over	1 hour	not assigned.not annotated
	Prupe.7G261400	Prupe.7G261400.5	Prupe.7G261400.5.p	CPL4	C-terminal domain phosphatase-like 4	8.84102	0.0216264	Over	1 hour	RNA biosynthesis.RNA polymerase II-dependent transcription.RNA polymerase-II phosphorylation/dephosphorylation.group-II phosphatase / Protein modification.phosphorylation.aspartate-based protein phosphatase superfamily.FCP phosphatase families.subcluster H/CPL3-4 phosphatase
	Prupe.8G000800	Prupe.8G000800.1	Prupe.8G000800.1.p		RmlC-like cupins superfamily protein	1.56713	0.0347705	Over	1 hour	not assigned.not annotated
	Prupe.8G007800	Prupe.8G007800.1	Prupe.8G007800.1.p		Protein of unknown function (DUF1442)	1.30556	0.0084363	Over	1 hour	not assigned.not annotated
	Prupe.8G010200	Prupe.8G010200.1	Prupe.8G010200.1.p	RPM1,RPS3	NB-ARC domain-containing disease resistance protein	1.44985	0.00019353	Over	1 hour	External stimuli response.pathogen.effector-triggered immunity (ETI) network.RIN4-RPM1 immune signalling.CC-NLR-type effector receptor (RPM1)
	Prupe.8G018700	Prupe.8G018700.1	Prupe.8G018700.1.p		Plant stearoyl-acyl-carrier-protein desaturase family protein	1.40999	0.001445	Over	1 hour	Lipid metabolism.fatty acid biosynthesis.fatty acid desaturation.stearoyl-ACP desaturase
	Prupe.8G022200	Prupe.8G022200.1	Prupe.8G022200.1.p		Dof-type zinc finger DNA-binding family protein	1.60906	6.23778e-05	Over	1 hour	RNA biosynthesis.transcriptional regulation.C2C2 transcription factor superfamily.transcription factor (DOF)
	Prupe.8G022500	Prupe.8G022500.1	Prupe.8G022500.1.p	MKS1	MAP kinase substrate 1	1.25755	3.11051e-07	Over	1 hour	not assigned.not annotated
	Prupe.8G023900	Prupe.8G023900.1	Prupe.8G023900.1.p		disease resistance protein (TIR-NBS-LRR class), putative	1.24541	9.28017e-13	Over	1 hour	External stimuli response.pathogen.effector-triggered immunity (ETI) network.effector receptor (NLR)
	Prupe.8G024400	Prupe.8G024400.1	Prupe.8G024400.1.p	IDL4	inflorescence deficient in abscission (IDA)-like 4	1.1793	0.00868549	Over	1 hour	Phytohormone action.signalling peptides.NCRP (non-cysteine-rich-peptide) category.IDL-peptide activity.IDA/IDL-precursor polypeptide
	Prupe.8G024500	Prupe.8G024500.1	Prupe.8G024500.1.p	ATPUB29,PUB29	plant U-box 29	1.97145	1.26091e-08	Over	1 hour	Protein homeostasis.ubiquitin-proteasome system.ubiquitin-fold protein conjugation.ubiquitin conjugation (ubiquitylation).ubiquitin-ligase E3 activities.U-Box E3 ligase activities.E3 ubiquitin ligase (PUB)
	Prupe.8G024600	Prupe.8G024600.1	Prupe.8G024600.1.p	RLK1	receptor-like protein kinase 1	2.10418	1.01899e-08	Over	1 hour	Enzyme classification.EC_2 transferases.EC_2.7 transferase transferring phosphorus-containing group
	Prupe.8G031200	Prupe.8G031200.1	Prupe.8G031200.1.p		Protein of unknown function (DUF793)	1.51058	0.000126359	Over	1 hour	not assigned.not annotated
	Prupe.8G032500	Prupe.8G032500.1	Prupe.8G032500.1.p		Protein of unknown function (DUF677)	1.37811	0.000315984	Over	1 hour	not assigned.annotated
	Prupe.8G035600	Prupe.8G035600.1	Prupe.8G035600.1.p		RmlC-like cupins superfamily protein	2.29706	0.0336005	Over	1 hour	not assigned.annotated
	Prupe.8G038800	Prupe.8G038800.2	Prupe.8G038800.2.p	DMT7,DRM2	domains rearranged methyltransferase 2	9.10512	0.000735625	Over	1 hour	Chromatin organisation.DNA methylation.RNA-directed DNA methylation (RdDM) pathway.de novo DNA methylase (DRM)
	Prupe.8G044300	Prupe.8G044300.1	Prupe.8G044300.1.p		disease resistance protein (TIR-NBS-LRR class), putative	1.93975	0.00415551	Over	1 hour	External stimuli response.pathogen.effector-triggered immunity (ETI) network.effector receptor (NLR)
	Prupe.8G059500	Prupe.8G059500.2	Prupe.8G059500.2.p			8.19074	0.00067559	Over	1 hour	not assigned.not annotated
	Prupe.8G065400	Prupe.8G065400.1	Prupe.8G065400.1.p	AGP1,ATAGP1	arabinogalactan protein 1	1.43512	0.000266459	Over	1 hour	Cell wall organisation.cell wall proteins.hydroxyproline-rich glycoprotein activities.arabinogalactan-protein (AGP) activities.classical AGP
	Prupe.8G065500	Prupe.8G065500.1	Prupe.8G065500.1.p	AGP1,ATAGP1	arabinogalactan protein 1	1.92116	3.21538e-10	Over	1 hour	Cell wall organisation.cell wall proteins.hydroxyproline-rich glycoprotein activities.arabinogalactan-protein (AGP) activities.classical AGP
	Prupe.8G065600	Prupe.8G065600.1	Prupe.8G065600.1.p			1.66223	0.0386325	Over	1 hour	Cell wall organisation.cell wall proteins.hydroxyproline-rich glycoprotein activities.arabinogalactan-protein (AGP) activities.classical AGP
	Prupe.8G065700	Prupe.8G065700.1	Prupe.8G065700.1.p	AGP1,ATAGP1	arabinogalactan protein 1	1.90174	0.0166926	Over	1 hour	Cell wall organisation.cell wall proteins.hydroxyproline-rich glycoprotein activities.arabinogalactan-protein (AGP) activities.classical AGP
	Prupe.8G065800	Prupe.8G065800.1	Prupe.8G065800.1.p			1.69569	0.023616	Over	1 hour	Cell wall organisation.cell wall proteins.hydroxyproline-rich glycoprotein activities.arabinogalactan-protein (AGP) activities.classical AGP
	Prupe.8G066000	Prupe.8G066000.1	Prupe.8G066000.1.p			1.8475	0.0422877	Over	1 hour	Cell wall organisation.cell wall proteins.hydroxyproline-rich glycoprotein activities.arabinogalactan-protein (AGP) activities.classical AGP
	Prupe.8G066100	Prupe.8G066100.1	Prupe.8G066100.1.p			2.13632	2.5959e-05	Over	1 hour	Cell wall organisation.cell wall proteins.hydroxyproline-rich glycoprotein activities.arabinogalactan-protein (AGP) activities.classical AGP
	Prupe.8G067800	Prupe.8G067800.1	Prupe.8G067800.1.p	2002-12-01	dicarboxylate carrier 2	2.36385	5.89279e-08	Over	1 hour	Solute transport.carrier-mediated transport.solute transporter (MTCC)
	Prupe.8G071300	Prupe.8G071300.3	Prupe.8G071300.3.p	GATA24,TIFY2B,ZML1	ZIM-like 1	3.26619	0.023632	Over	1 hour	RNA biosynthesis.transcriptional regulation.C2C2 transcription factor superfamily.transcription factor (GATA)
	Prupe.8G073300	Prupe.8G073300.6	Prupe.8G073300.6.p	ALDH6B2	aldehyde dehydrogenase 6B2	1.56229	0.0343667	Over	1 hour	Amino acid metabolism.degradation.branched-chain amino acid.valine.methylmalonate-semialdehyde dehydrogenase
	Prupe.8G079800	Prupe.8G079800.1	Prupe.8G079800.1.p		NB-ARC domain-containing disease resistance protein	1.24277	4.50814e-13	Over	1 hour	not assigned.annotated
	Prupe.8G083500	Prupe.8G083500.6	Prupe.8G083500.6.p		3-oxo-5-alpha-steroid 4-dehydrogenase family protein	9.15559	0.000158134	Over	1 hour	Enzyme classification.EC_1 oxidoreductases.EC_1.3 oxidoreductase acting on CH-CH group of donor
	Prupe.8G086000	Prupe.8G086000.1	Prupe.8G086000.1.p		Protein of unknown function (DUF1640)	1.10951	2.90076e-08	Over	1 hour	not assigned.not annotated
	Prupe.8G092600	Prupe.8G092600.1	Prupe.8G092600.1.p	BCS1	cytochrome BC1 synthesis	1.04152	8.01878e-05	Over	1 hour	not assigned.annotated
	Prupe.8G110400	Prupe.8G110400.1	Prupe.8G110400.1.p		Transducin/WD40 repeat-like superfamily protein	2.5868	2.92572e-17	Over	1 hour	not assigned.annotated
	Prupe.8G112300	Prupe.8G112300.1	Prupe.8G112300.1.p	KUOX1	KAR-UP oxidoreductase 1	3.21308	0.000375901	Over	1 hour	not assigned.annotated
	Prupe.8G113000	Prupe.8G113000.4	Prupe.8G113000.4.p	REM39,VRN1	AP2/B3-like transcriptional factor family protein	1.34348	0.0388896	Over	1 hour	RNA biosynthesis.transcriptional regulation.B3 transcription factor superfamily.transcription factor (REM)
	Prupe.8G117300	Prupe.8G117300.1	Prupe.8G117300.1.p		Disease resistance protein (TIR-NBS-LRR class) family	2.11855	3.62912e-09	Over	1 hour	External stimuli response.pathogen.effector-triggered immunity (ETI) network.effector receptor (NLR)
	Prupe.8G119300	Prupe.8G119300.1	Prupe.8G119300.1.p		Protein of unknown function (DUF1645)	1.03052	8.70062e-11	Over	1 hour	not assigned.not annotated
	Prupe.8G119600	Prupe.8G119600.1	Prupe.8G119600.1.p			1.66457	3.3943e-07	Over	1 hour	not assigned.not annotated
	Prupe.8G125100	Prupe.8G125100.1	Prupe.8G125100.1.p	RRTF1	redox responsive transcription factor 1	4.64354	2.85005e-11	Over	1 hour	RNA biosynthesis.transcriptional regulation.AP2/ERF transcription factor superfamily.transcription factor (ERF)
	Prupe.8G130100	Prupe.8G130100.1	Prupe.8G130100.1.p	UGT73B3	UDP-glucosyl transferase 73B3	1.69222	0.000972342	Over	1 hour	Secondary metabolism.phenolics.flavonoid biosynthesis.flavonol glycosides.flavonol 3-O-glycosyltransferase
	Prupe.8G130200	Prupe.8G130200.1	Prupe.8G130200.1.p	UGT73B3	UDP-glucosyl transferase 73B3	1.05357	0.00263117	Over	1 hour	Secondary metabolism.phenolics.flavonoid biosynthesis.flavonol glycosides.flavonol 3-O-glycosyltransferase
	Prupe.8G130300	Prupe.8G130300.1	Prupe.8G130300.1.p	UGT73B3	UDP-glucosyl transferase 73B3	1.03431	0.00173239	Over	1 hour	Secondary metabolism.phenolics.flavonoid biosynthesis.flavonol glycosides.flavonol 3-O-glycosyltransferase
	Prupe.8G130700	Prupe.8G130700.1	Prupe.8G130700.1.p	UGT73B3	UDP-glucosyl transferase 73B3	1.95255	0.000466047	Over	1 hour	Secondary metabolism.phenolics.flavonoid biosynthesis.flavonol glycosides.flavonol 3-O-glycosyltransferase
	Prupe.8G131800	Prupe.8G131800.1	Prupe.8G131800.1.p		Calcium-dependent lipid-binding (CaLB domain) family protein	2.56842	0.00223798	Over	1 hour	not assigned.not annotated
	Prupe.8G134900	Prupe.8G134900.1	Prupe.8G134900.1.p	ATMYB73,MYB73	myb domain protein 73	2.45459	5.77597e-19	Over	1 hour	RNA biosynthesis.transcriptional regulation.MYB transcription factor superfamily.transcription factor (MYB)
	Prupe.8G137000	Prupe.8G137000.1	Prupe.8G137000.1.p			4.00901	8.77434e-06	Over	1 hour	not assigned.not annotated
	Prupe.8G142400	Prupe.8G142400.1	Prupe.8G142400.1.p	STZ,ZAT10	salt tolerance zinc finger	3.30114	1.17941e-25	Over	1 hour	RNA biosynthesis.transcriptional regulation.transcription factor (C2H2-ZF)
	Prupe.8G142800	Prupe.8G142800.1	Prupe.8G142800.1.p			2.1931	5.98887e-15	Over	1 hour	not assigned.not annotated
	Prupe.8G142900	Prupe.8G142900.1	Prupe.8G142900.1.p		GroES-like zinc-binding alcohol dehydrogenase family protein	1.48084	0.0212199	Over	1 hour	Carbohydrate metabolism.sorbitol metabolism.sorbitol dehydrogenase
	Prupe.8G148600	Prupe.8G148600.1	Prupe.8G148600.1.p		Uncharacterised conserved protein UCP031279	1.44524	0.000351272	Over	1 hour	not assigned.not annotated
	Prupe.8G148800	Prupe.8G148800.1	Prupe.8G148800.1.p		Uncharacterised conserved protein UCP031279	1.42894	0.0152471	Over	1 hour	not assigned.not annotated
	Prupe.8G156200	Prupe.8G156200.2	Prupe.8G156200.2.p		MuDR family transposase	1.62134	0.0177016	Over	1 hour	not assigned.not annotated
	Prupe.8G156700	Prupe.8G156700.1	Prupe.8G156700.1.p	SQE1,XF1	FAD/NAD(P)-binding oxidoreductase family protein	1.39568	0.00187708	Over	1 hour	Secondary metabolism.terpenoids.cycloartenol biosynthesis.squalene epoxidase
	Prupe.8G156800	Prupe.8G156800.1	Prupe.8G156800.1.p	SQE1,XF1	FAD/NAD(P)-binding oxidoreductase family protein	1.054	0.00133868	Over	1 hour	Secondary metabolism.terpenoids.cycloartenol biosynthesis.squalene epoxidase
	Prupe.8G162800	Prupe.8G162800.1	Prupe.8G162800.1.p		Chaperone DnaJ-domain superfamily protein	2.19685	0.00102166	Over	1 hour	not assigned.annotated
	Prupe.8G169400	Prupe.8G169400.1	Prupe.8G169400.1.p			1.58585	2.66537e-11	Over	1 hour	not assigned.not annotated
	Prupe.8G172200	Prupe.8G172200.1	Prupe.8G172200.1.p			1.33845	0.0221643	Over	1 hour	not assigned.not annotated
	Prupe.8G174800	Prupe.8G174800.1	Prupe.8G174800.1.p	anac036,NAC036	NAC domain containing protein 36	1.06024	0.00520002	Over	1 hour	RNA biosynthesis.transcriptional regulation.transcription factor (NAC)
	Prupe.8G183500	Prupe.8G183500.3	Prupe.8G183500.3.p	NPL1,PHOT2	phototropin 2	1.8344	0.000782788	Over	1 hour	Protein modification.phosphorylation.AGC protein kinase superfamily.protein kinase (AGC-VIII) /Cytoskeleton organisation.plastid movement.phototropin light receptor (PHOT) /External stimuli response.light.UV-A/blue light.phototropin-mediated photoperception.phototropin photoreceptor
	Prupe.8G186400	Prupe.8G186400.1	Prupe.8G186400.1.p	BIR1	BAK1-interacting receptor-like kinase 1	1.01738	0.0103164	Over	1 hour	not assigned.annotated
	Prupe.8G187400	Prupe.8G187400.1	Prupe.8G187400.1.p		Protein of unknown function (DUF707)	1.31757	0.0103651	Over	1 hour	not assigned.not annotated
	Prupe.8G188800	Prupe.8G188800.1	Prupe.8G188800.1.p	AGD11	ARF-GAP domain 11	1.97274	5.7633e-06	Over	1 hour	not assigned.annotated
	Prupe.8G192500	Prupe.8G192500.2	Prupe.8G192500.2.p		Auxin-responsive family protein	2.06711	6.92431e-08	Over	1 hour	not assigned.annotated
	Prupe.8G193500	Prupe.8G193500.3	Prupe.8G193500.3.p	ATPUB9,PUB9	plant U-box 9	1.38082	4.9865e-05	Over	1 hour	Protein homeostasis.ubiquitin-proteasome system.ubiquitin-fold protein conjugation.ubiquitin conjugation (ubiquitylation).ubiquitin-ligase E3 activities.U-Box E3 ligase activities.E3 ubiquitin ligase (PUB)
	Prupe.8G195900	Prupe.8G195900.2	Prupe.8G195900.2.p		Oxidoreductase, zinc-binding dehydrogenase family protein	1.18608	0.0177016	Over	1 hour	not assigned.annotated
	Prupe.8G213800	Prupe.8G213800.1	Prupe.8G213800.1.p	ABCG40,ATABCG40,ATPDR12,PDR12	pleiotropic drug resistance 12	1.53239	0.0431922	Over	1 hour	Solute transport.primary active transport.ABC superfamily.ABC2 family.subfamily ABCG transporter
	Prupe.8G220600	Prupe.8G220600.3	Prupe.8G220600.3.p		Calcium-binding EF-hand family protein	8.33597	0.0100854	Over	1 hour	Protein modification.phosphorylation.serine/threonine protein phosphatase superfamily.PPP Fe-Zn-dependent phosphatase families.PP2A-class phosphatase complexes.regulatory component B2
	Prupe.8G221200	Prupe.8G221200.1	Prupe.8G221200.1.p		P-loop containing nucleoside triphosphate hydrolases superfamily protein	1.33843	4.01493e-14	Over	1 hour	not assigned.annotated
	Prupe.8G228400	Prupe.8G228400.1	Prupe.8G228400.1.p			2.51411	4.04084e-06	Over	1 hour	not assigned.not annotated
	Prupe.8G231600	Prupe.8G231600.1	Prupe.8G231600.1.p	PSBW	photosystem II reaction center W	1.34612	0.0270075	Over	1 hour	Photosynthesis.photophosphorylation.photosystem II.PS-II complex.component PsbW
	Prupe.8G232000	Prupe.8G232000.1	Prupe.8G232000.1.p	FBL17	RNI-like superfamily protein	1.68646	1.44015e-06	Over	1 hour	Protein homeostasis.ubiquitin-proteasome system.ubiquitin-fold protein conjugation.Cullin-based ubiquitylation complexes.SKP1-CUL1-FBX (SCF) E3 ligase complexes.F-BOX substrate adaptor components.component FBX
	Prupe.8G234000	Prupe.8G234000.1	Prupe.8G234000.1.p	CML11	calmodulin-like 11	1.01698	0.0142706	Over	1 hour	not assigned.annotated
	Prupe.8G237300	Prupe.8G237300.1	Prupe.8G237300.1.p		Protein of unknown function (DUF581)	1.22054	3.48127e-06	Over	1 hour	Multi-process regulation.SnRK1-kinase regulatory system.SnRK1-interacting factor (FLZ)
	Prupe.8G238100	Prupe.8G238100.3	Prupe.8G238100.3.p		Galactose oxidase/kelch repeat superfamily protein	1.60771	4.21836e-05	Over	1 hour	not assigned.annotated
	Prupe.8G245700	Prupe.8G245700.1	Prupe.8G245700.1.p		Eukaryotic aspartyl protease family protein	1.00148	0.000139879	Over	1 hour	Protein homeostasis.proteolysis.aspartic-type peptidase activities.A1-class protease (Pepsin)
	Prupe.8G247200	Prupe.8G247200.1	Prupe.8G247200.1.p			2.1117	0.0414015	Over	1 hour	not assigned.not annotated
	Prupe.8G263900	Prupe.8G263900.1	Prupe.8G263900.1.p		Plant invertase/pectin methylesterase inhibitor superfamily	1.85685	3.23158e-07	Over	1 hour	Cell wall organisation.pectin.homogalacturonan.modification and degradation.pectin methylesterase
	Prupe.8G264900	Prupe.8G264900.1	Prupe.8G264900.1.p	HRE2	Integrase-type DNA-binding superfamily protein	1.35406	6.37306e-09	Over	1 hour	RNA biosynthesis.transcriptional regulation.AP2/ERF transcription factor superfamily.transcription factor (ERF)
	Prupe.8G267700	Prupe.8G267700.1	Prupe.8G267700.1.p		Late embryogenesis abundant (LEA) hydroxyproline-rich glycoprotein family	1.01577	0.00241378	Over	1 hour	not assigned.annotated
	Prupe.8G269600	Prupe.8G269600.1	Prupe.8G269600.1.p			2.57349	4.43882e-07	Over	1 hour	not assigned.not annotated
	Prupe.8G270000	Prupe.8G270000.1	Prupe.8G270000.1.p	ATMYB12,MYB12,PFG1	myb domain protein 12	2.76649	1.3625e-17	Over	1 hour	RNA biosynthesis.transcriptional regulation.MYB transcription factor superfamily.transcription factor (MYB)
	Prupe.I002600	Prupe.I002600.1	Prupe.I002600.1.p		UDP-Glycosyltransferase superfamily protein	1.32305	5.90619e-07	Over	1 hour	Enzyme classification.EC_2 transferases.EC_2.4 glycosyltransferase
	Prupe.I005700	Prupe.I005700.1	Prupe.I005700.1.p	ATCHS,CHS,TT4	Chalcone and stilbene synthase family protein	2.21349	0.000123209	Over	1 hour	Enzyme classification.EC_2 transferases.EC_2.3 acyltransferase
	Prupe.1G005400	Prupe.1G005400.1	Prupe.1G005400.1.p	CLE41	CLAVATA3/ESR-RELATED 41	-1.44041	0.00569211	Under	1 hour	Phytohormone action.signalling peptides.NCRP (non-cysteine-rich-peptide) category.CLE-TDIF-peptide activity.TDIF-precursor polypeptide
	Prupe.1G008200	Prupe.1G008200.5	Prupe.1G008200.5.p	ATCYS6,ATCYSB,CYSB	cystatin B	-1.16092	0.0315527	Under	1 hour	not assigned.not annotated
	Prupe.1G018900	Prupe.1G018900.2	Prupe.1G018900.2.p	HMT3	homocysteine S-methyltransferase 3	-1.79112	0.00162591	Under	1 hour	Amino acid metabolism.biosynthesis.aspartate family.aspartate-derived amino acids.methionine.S-methylmethionine cycle.homocysteine S-methyltransferase
	Prupe.1G018900	Prupe.1G018900.5	Prupe.1G018900.5.p	HMT3	homocysteine S-methyltransferase 3	-2.73946	0.000142429	Under	1 hour	Amino acid metabolism.biosynthesis.aspartate family.aspartate-derived amino acids.methionine.S-methylmethionine cycle.homocysteine S-methyltransferase
	Prupe.1G035800	Prupe.1G035800.1	Prupe.1G035800.1.p		2-oxoglutarate (2OG) and Fe(II)-dependent oxygenase superfamily protein	-1.49857	0.010185	Under	1 hour	Enzyme classification.EC_1 oxidoreductases.EC_1.14 oxidoreductase acting on paired donor with incorporation or reduction of molecular oxygen
	Prupe.1G061500	Prupe.1G061500.1	Prupe.1G061500.1.p		Tetratricopeptide repeat (TPR)-like superfamily protein	-1.06015	0.0437398	Under	1 hour	not assigned.annotated
	Prupe.1G117500	Prupe.1G117500.2	Prupe.1G117500.2.p			-5.25834	0.0216471	Under	1 hour	not assigned.not annotated
	Prupe.1G144800	Prupe.1G144800.1	Prupe.1G144800.1.p		Major facilitator superfamily protein	-2.65018	0.000899354	Under	1 hour	Solute transport.carrier-mediated transport.MFS superfamily.SP family.monosaccharide transporter (ERD6)
	Prupe.1G162000	Prupe.1G162000.1	Prupe.1G162000.1.p		Protein kinase protein with adenine nucleotide alpha hydrolases-like domain	-4.04996	0.0128434	Under	1 hour	not assigned.not annotated
	Prupe.1G172700	Prupe.1G172700.1	Prupe.1G172700.1.p		RNA-binding (RRM/RBD/RNP motifs) family protein	-1.92548	0.0106394	Under	1 hour	RNA processing.pre-mRNA splicing.U12-type-intron-specific minor spliceosome.U11 small nuclear ribonucleoprotein particle (snRNP).protein factor (U11-35K)
	Prupe.1G183100	Prupe.1G183100.3	Prupe.1G183100.3.p			-1.55734	4.34574e-05	Under	1 hour	not assigned.not annotated
	Prupe.1G207100	Prupe.1G207100.2	Prupe.1G207100.2.p		basic helix-loop-helix (bHLH) DNA-binding superfamily protein	-1.28235	0.0193822	Under	1 hour	RNA biosynthesis.transcriptional regulation.transcription factor (bHLH)
	Prupe.1G222200	Prupe.1G222200.1	Prupe.1G222200.1.p			-1.75609	0.0180747	Under	1 hour	not assigned.not annotated
	Prupe.1G226700	Prupe.1G226700.3	Prupe.1G226700.3.p	NF-YC13	nuclear factor Y, subunit C13	-1.15399	0.0199382	Under	1 hour	RNA biosynthesis.transcriptional regulation.transcription factor (DPB3)
	Prupe.1G233700	Prupe.1G233700.2	Prupe.1G233700.2.p	POLA2	DNA polymerase alpha 2	-1.13094	0.000548106	Under	1 hour	Cell cycle organisation.DNA replication.elongation.DNA polymerase alpha complex.replication fork tethering component POLA2
	Prupe.1G252200	Prupe.1G252200.2	Prupe.1G252200.2.p		DC1 domain-containing protein	-1.46923	0.00423964	Under	1 hour	Redox homeostasis.cytosol/mitochondrion/nucleus redox homeostasis.nucleoredoxin
	Prupe.1G301600	Prupe.1G301600.3	Prupe.1G301600.3.p	ATTADA,TADA	tRNA arginine adenosine deaminase	-7.89621	0.033368	Under	1 hour	RNA processing.organelle machinery.RNA editing.tRNA adenine deamination.chloroplast-tRNA adenosine deaminase
	Prupe.1G323900	Prupe.1G323900.3	Prupe.1G323900.3.p	QPT	quinolinate phoshoribosyltransferase	-2.45658	0.000344306	Under	1 hour	Coenzyme metabolism.NAD/NADP biosynthesis.de-novo pathway.quinolinate phosphoribosyl transferase
	Prupe.1G325100	Prupe.1G325100.10	Prupe.1G325100.10.p		DEAD/DEAH box RNA helicase family protein	-1.08624	0.0134761	Under	1 hour	Cell cycle organisation.organellar DNA replication.genome stability maintenance.DNA translocase (RecG)
	Prupe.1G344000	Prupe.1G344000.1	Prupe.1G344000.1.p	ATGA2OX8,GA2OX8	gibberellin 2-oxidase 8	-1.86757	0.00943489	Under	1 hour	Enzyme classification.EC_1 oxidoreductases.EC_1.14 oxidoreductase acting on paired donor with incorporation or reduction of molecular oxygen
	Prupe.1G353800	Prupe.1G353800.1	Prupe.1G353800.1.p		BTB/POZ domain-containing protein	-1.38778	0.00146523	Under	1 hour	not assigned.annotated
	Prupe.1G377300	Prupe.1G377300.1	Prupe.1G377300.1.p		NmrA-like negative transcriptional regulator family protein	-2.01045	0.0438449	Under	1 hour	Enzyme classification.EC_1 oxidoreductases.EC_1.3 oxidoreductase acting on CH-CH group of donor
	Prupe.1G379000	Prupe.1G379000.1	Prupe.1G379000.1.p		HAD-superfamily hydrolase, subfamily IG, 5\'-nucleotidase	-1.02929	0.00343083	Under	1 hour	Nucleotide metabolism.purines.catabolism.5-nucleotidase
	Prupe.1G405400	Prupe.1G405400.1	Prupe.1G405400.1.p	ATMYB111,MYB111,PFG3	myb domain protein 111	-1.53914	0.0338342	Under	1 hour	RNA biosynthesis.transcriptional regulation.MYB transcription factor superfamily.transcription factor (MYB)
	Prupe.1G409400	Prupe.1G409400.7	Prupe.1G409400.7.p		Putative lysine decarboxylase family protein	-1.61492	0.0295542	Under	1 hour	Phytohormone action.cytokinin.biosynthesis.cytokinin phosphoribohydrolase
	Prupe.1G419900	Prupe.1G419900.1	Prupe.1G419900.1.p			-1.37004	0.0483935	Under	1 hour	not assigned.not annotated
	Prupe.1G422200	Prupe.1G422200.3	Prupe.1G422200.3.p	WLIM1	GATA type zinc finger transcription factor family protein	-1.45386	0.00825135	Under	1 hour	RNA biosynthesis.transcriptional regulation.transcription factor (LIM)
	Prupe.1G435100	Prupe.1G435100.1	Prupe.1G435100.1.p	COR27	cold regulated gene 27	-1.05371	0.04742	Under	1 hour	not assigned.not annotated
	Prupe.1G461400	Prupe.1G461400.1	Prupe.1G461400.1.p	ATRPA2,ATRPA32A,ROR1,RPA2,RPA32A	replicon protein A2	-1.6097	8.73603e-06	Under	1 hour	Cell cycle organisation.DNA replication.elongation.single-stranded-DNA binding RPA complex.component RPA2/Cell cycle organisation.mitosis and meiosis.meiotic recombination.DNA strand exchange.RPA presynaptic filament assembly factor complex.component RPA2
	Prupe.1G494200	Prupe.1G494200.2	Prupe.1G494200.2.p	ARR9,ATRR4	response regulator 9	-8.06315	0.00754872	Under	1 hour	Phytohormone action.cytokinin.perception and signal transduction.A-type ARR response negative regulator
	Prupe.1G535200	Prupe.1G535200.2	Prupe.1G535200.2.p	ATHVA22A,HVA22A	HVA22 homologue A	-7.61582	0.00368966	Under	1 hour	not assigned.not annotated
	Prupe.1G542200	Prupe.1G542200.1	Prupe.1G542200.1.p	ZW2	transcription factor-related	-1.0927	0.00146523	Under	1 hour	RNA biosynthesis.transcriptional regulation.bZIP transcription factor superfamily.transcription factor (DOG)
	Prupe.1G549400	Prupe.1G549400.1	Prupe.1G549400.1.p		alpha/beta-Hydrolases superfamily protein	-1.62984	0.0225425	Under	1 hour	not assigned.annotated
	Prupe.1G566800	Prupe.1G566800.1	Prupe.1G566800.1.p		Plant protein of unknown function (DUF639)	-8.03069	0.0460447	Under	1 hour	not assigned.not annotated
	Prupe.2G019200	Prupe.2G019200.1	Prupe.2G019200.1.p	CPH,SMT1	sterol methyltransferase 1	-1.64107	0.00480955	Under	1 hour	Lipid metabolism.phytosterol biosynthesis.campesterol.sterol C-24 methyltransferase
	Prupe.2G023700	Prupe.2G023700.1	Prupe.2G023700.1.p	scpl40	serine carboxypeptidase-like 40	-1.37897	0.000112934	Under	1 hour	Protein homeostasis.proteolysis.serine-type peptidase activities.S10-class serine carboxypeptidase (SCPL)
	Prupe.2G043300	Prupe.2G043300.2	Prupe.2G043300.2.p			-7.82917	0.00680976	Under	1 hour	not assigned.annotated
	Prupe.2G053500	Prupe.2G053500.6	Prupe.2G053500.6.p		Polynucleotidyl transferase, ribonuclease H-like superfamily protein	-2.19047	0.0392323	Under	1 hour	not assigned.annotated
	Prupe.2G063900	Prupe.2G063900.1	Prupe.2G063900.1.p		Leucine-rich repeat protein kinase family protein	-1.75922	0.000294987	Under	1 hour	Protein modification.phosphorylation.TKL protein kinase superfamily.LRR-VI protein kinase families.protein kinase (LRR-VI-1)
	Prupe.2G077200	Prupe.2G077200.1	Prupe.2G077200.1.p	TBL36	TRICHOME BIREFRINGENCE-LIKE 36	-1.17815	0.0259242	Under	1 hour	not assigned.annotated
	Prupe.2G084100	Prupe.2G084100.1	Prupe.2G084100.1.p	ACN2,AtABCD1,CTS,PED3,PXA1	peroxisomal ABC transporter 1	-9.16155	0.0120741	Under	1 hour	Lipid metabolism.lipid trafficking.peroxisomal fatty acid transporter (PXA1)/Solute transport.primary active transport.ABC superfamily.ABC1 family.subfamily ABCD transporter/Enzyme classification.EC_2 transferases.EC_2.4 glycosyltransferase
	Prupe.2G085100	Prupe.2G085100.1	Prupe.2G085100.1.p		UDP-Glycosyltransferase superfamily protein	-1.19953	0.00032402	Under	1 hour	not assigned.annotated
	Prupe.2G167700	Prupe.2G167700.2	Prupe.2G167700.2.p		disease resistance family protein / LRR family protein	-9.40306	7.72393e-06	Under	1 hour	not assigned.annotated
	Prupe.2G170200	Prupe.2G170200.1	Prupe.2G170200.1.p		2-oxoglutarate (2OG) and Fe(II)-dependent oxygenase superfamily protein	-1.08164	0.018692	Under	1 hour	Enzyme classification.EC_1 oxidoreductases.EC_1.14 oxidoreductase acting on paired donor with incorporation or reduction of molecular oxygen
	Prupe.2G197400	Prupe.2G197400.1	Prupe.2G197400.1.p		UDP-Glycosyltransferase superfamily protein	-1.03862	0.0205917	Under	1 hour	Carbohydrate metabolism.starch metabolism.biosynthesis.starch synthase activities.granule-bound starch (amylose) synthase
	Prupe.2G225900	Prupe.2G225900.1	Prupe.2G225900.1.p	KCS19	3-ketoacyl-CoA synthase 19	-2.49568	0.000323266	Under	1 hour	Lipid metabolism.fatty acid biosynthesis.endoplasmic reticulum-localized fatty acid elongase (FAE) system.fatty acid elongation complex.3-ketoacyl-CoA synthase (KCS)
	Prupe.2G246800	Prupe.2G246800.1	Prupe.2G246800.1.p		HXXXD-type acyl-transferase family protein	-1.38956	0.0255687	Under	1 hour	not assigned.annotated
	Prupe.2G250700	Prupe.2G250700.1	Prupe.2G250700.1.p		Double Clp-N motif-containing P-loop nucleoside triphosphate hydrolases superfamily protein	-1.51629	0.0220349	Under	1 hour	Phytohormone action.strigolactone.perception and signal transduction.signal transducer (SMXL)
	Prupe.2G259400	Prupe.2G259400.1	Prupe.2G259400.1.p		Transmembrane amino acid transporter family protein	-1.59751	9.76651e-05	Under	1 hour	Solute transport.carrier-mediated transport.APC superfamily.AAAP family.solute transporter (AAAP)
	Prupe.2G263600	Prupe.2G263600.2	Prupe.2G263600.2.p	ATEXP8,ATEXPA8,ATHEXP ALPHA 1.11,EXP8,EXPA8	expansin A8	-1.12324	3.09582e-07	Under	1 hour	Cell wall organisation.cell wall proteins.expansin activities.alpha-class expansin
	Prupe.2G271100	Prupe.2G271100.1	Prupe.2G271100.1.p	CYCP4;1	cyclin p4;1	-1.19351	0.0270075	Under	1 hour	Cell cycle organisation.cell cycle control.cyclin-dependent regulation.cyclin activities.cyclin (CYCP)
	Prupe.2G273600	Prupe.2G273600.2	Prupe.2G273600.2.p		Diacylglycerol kinase family protein	-8.79817	0.0274872	Under	1 hour	Lipid metabolism.sphingolipid biosynthesis.ceramide kinase
	Prupe.2G273700	Prupe.2G273700.3	Prupe.2G273700.3.p		N-terminal nucleophile aminohydrolases (Ntn hydrolases) superfamily protein	-1.45989	0.0343687	Under	1 hour	Enzyme classification.EC_3 hydrolases.EC_3.4 hydrolase acting on peptide bond (peptidase)
	Prupe.2G275400	Prupe.2G275400.1	Prupe.2G275400.1.p		Ribosomal protein L23/L15e family protein	-1.38155	0.00537212	Under	1 hour	Protein biosynthesis.ribosome biogenesis.large ribosomal subunit (LSU).LSU proteome.component RPL15
	Prupe.2G291900	Prupe.2G291900.1	Prupe.2G291900.1.p		PEBP (phosphatidylethanolamine-binding protein) family protein	-1.0839	0.0279372	Under	1 hour	Multi-process regulation.PEB protein-dependent signalling.regulatory protein (PEBP)
	Prupe.2G295400	Prupe.2G295400.1	Prupe.2G295400.1.p			-1.59297	0.000406313	Under	1 hour	not assigned.not annotated
	Prupe.2G296900	Prupe.2G296900.4	Prupe.2G296900.4.p		alpha/beta-Hydrolases superfamily protein	-3.78195	0.00258879	Under	1 hour	not assigned.not annotated
	Prupe.2G304400	Prupe.2G304400.4	Prupe.2G304400.4.p			-1.41877	0.0499718	Under	1 hour	not assigned.annotated
	Prupe.2G324600	Prupe.2G324600.4	Prupe.2G324600.4.p	ARFB1B,ATARFB1B	ADP-ribosylation factor B1B	-1.77539	0.0180493	Under	1 hour	Vesicle trafficking.Coat protein I (COPI) coatomer machinery.coat protein recruiting.ARF-GTPase
	Prupe.3G006200	Prupe.3G006200.2	Prupe.3G006200.2.p		Polyketide cyclase/dehydrase and lipid transport superfamily protein	-1.17208	0.00171655	Under	1 hour	not assigned.not annotated
	Prupe.3G216200	Prupe.3G216200.1	Prupe.3G216200.1.p			-4.2237	0.000884764	Under	1 hour	not assigned.not annotated
	Prupe.3G230300	Prupe.3G230300.1	Prupe.3G230300.1.p		Wound-responsive family protein	-1.06665	0.00293508	Under	1 hour	not assigned.not annotated
	Prupe.3G241900	Prupe.3G241900.2	Prupe.3G241900.2.p			-1.27142	0.0435929	Under	1 hour	not assigned.not annotated
	Prupe.3G263500	Prupe.3G263500.1	Prupe.3G263500.1.p		Protein of unknown function (DUF1997)	-1.40981	8.23775e-15	Under	1 hour	not assigned.not annotated
	Prupe.3G269600	Prupe.3G269600.2	Prupe.3G269600.2.p		RNA-binding (RRM/RBD/RNP motifs) family protein	-1.39447	0.0202792	Under	1 hour	not assigned.not annotated
	Prupe.3G284600	Prupe.3G284600.1	Prupe.3G284600.1.p		Oxidoreductase, zinc-binding dehydrogenase family protein	-1.4213	8.6598e-05	Under	1 hour	not assigned.annotated
	Prupe.4G002900	Prupe.4G002900.1	Prupe.4G002900.1.p	D6PKL2,PK5	D6 protein kinase like 2	-1.65232	0.0395832	Under	1 hour	Protein modification.phosphorylation.AGC protein kinase superfamily.protein kinase (AGC-VIII)
	Prupe.4G009700	Prupe.4G009700.2	Prupe.4G009700.2.p	UPL5	ubiquitin protein ligase 5	-1.7325	0.0387664	Under	1 hour	Protein homeostasis.ubiquitin-proteasome system.ubiquitin-fold protein conjugation.ubiquitin conjugation (ubiquitylation).ubiquitin-ligase E3 activities.HECT-type E3 ligase activities.monomeric E3 ubiquitin ligase (HECT)
	Prupe.4G011900	Prupe.4G011900.1	Prupe.4G011900.1.p		Protein of unknown function (DUF506)	-4.79514	2.31816e-06	Under	1 hour	not assigned.not annotated
	Prupe.4G017900	Prupe.4G017900.1	Prupe.4G017900.1.p	NRPD4,NRPE4,RDM2	RNA polymerase II, Rpb4, core protein	-1.21056	0.00803838	Under	1 hour	RNA biosynthesis.DNA-dependent RNA polymerase (Pol) complexes.Pol I-V shared regulatory components.subunit 4
	Prupe.4G040100	Prupe.4G040100.1	Prupe.4G040100.1.p			-1.45143	0.000848125	Under	1 hour	not assigned.not annotated
	Prupe.4G047800	Prupe.4G047800.3	Prupe.4G047800.3.p	LOX3	lipoxygenase 3	-7.56775	1.21535e-07	Under	1 hour	Enzyme classification.EC_1 oxidoreductases.EC_1.13 oxidoreductase acting on single donor with incorporation of molecular oxygen (oxygenase)
	Prupe.4G078300	Prupe.4G078300.1	Prupe.4G078300.1.p	MCM3	Minichromosome maintenance (MCM2/3/5) family protein	-1.25285	7.1112e-06	Under	1 hour	Cell cycle organisation.DNA replication.preinitiation.MCM replicative DNA helicase complex.component MCM3
	Prupe.4G108500	Prupe.4G108500.1	Prupe.4G108500.1.p		SBP (S-ribonuclease binding protein) family protein	-1.15558	4.39152e-10	Under	1 hour	not assigned.annotated
	Prupe.4G114700	Prupe.4G114700.1	Prupe.4G114700.1.p			-1.10054	0.0201383	Under	1 hour	not assigned.not annotated
	Prupe.4G120400	Prupe.4G120400.1	Prupe.4G120400.1.p		DNA glycosylase superfamily protein	-1.86942	0.00014763	Under	1 hour	not assigned.not annotated
	Prupe.4G122400	Prupe.4G122400.1	Prupe.4G122400.1.p			-1.99815	0.0199217	Under	1 hour	not assigned.not annotated
	Prupe.4G151600	Prupe.4G151600.1	Prupe.4G151600.1.p			-1.32123	1.56844e-08	Under	1 hour	not assigned.not annotated
	Prupe.4G177000	Prupe.4G177000.1	Prupe.4G177000.1.p			-1.60275	0.00505232	Under	1 hour	not assigned.not annotated
	Prupe.4G197500	Prupe.4G197500.4	Prupe.4G197500.4.p	BGLU41	beta glucosidase 41	-1.38755	0.0394322	Under	1 hour	Enzyme classification.EC_3 hydrolases.EC_3.2 glycosylase
	Prupe.4G264100	Prupe.4G264100.2	Prupe.4G264100.2.p	PYD2	pyrimidine 2	-8.06416	0.0152756	Under	1 hour	Nucleotide metabolism.pyrimidines.catabolism.dihydopyrimidine aminohydrolase (PYD2)
	Prupe.5G004500	Prupe.5G004500.2	Prupe.5G004500.2.p		ARID/BRIGHT DNA-binding domain-containing protein	-1.40597	0.0419789	Under	1 hour	RNA biosynthesis.transcriptional regulation.transcription factor (ARID)
	Prupe.5G006300	Prupe.5G006300.1	Prupe.5G006300.1.p	TMT2	tonoplast monosaccharide transporter2	-1.79428	0.00249029	Under	1 hour	Solute transport.carrier-mediated transport.MFS superfamily.SP family.monosaccharide transporter (AZT)
	Prupe.5G013300	Prupe.5G013300.1	Prupe.5G013300.1.p	EMB3006	embryo defective 3006	-1.50497	0.0148072	Under	1 hour	not assigned.not annotated
	Prupe.5G014700	Prupe.5G014700.1	Prupe.5G014700.1.p			-1.22249	0.00636613	Under	1 hour	not assigned.not annotated
	Prupe.5G036600	Prupe.5G036600.3	Prupe.5G036600.3.p	IKU1	VQ motif-containing protein	-9.47468	0.0118012	Under	1 hour	not assigned.not annotated
	Prupe.5G042300	Prupe.5G042300.1	Prupe.5G042300.1.p	NRT1.5	nitrate transporter 1.5	-1.35986	0.00829368	Under	1 hour	Solute transport.carrier-mediated transport.MFS superfamily.anion transporter (NRT1/PTR)
	Prupe.5G059100	Prupe.5G059100.1	Prupe.5G059100.1.p			-1.3466	0.00378755	Under	1 hour	not assigned.not annotated
	Prupe.5G059600	Prupe.5G059600.2	Prupe.5G059600.2.p		2-oxoglutarate (2OG) and Fe(II)-dependent oxygenase superfamily protein	-1.35567	0.000165925	Under	1 hour	Enzyme classification.EC_1 oxidoreductases.EC_1.14 oxidoreductase acting on paired donor with incorporation or reduction of molecular oxygen
	Prupe.5G072500	Prupe.5G072500.1	Prupe.5G072500.1.p			-1.39641	0.000581053	Under	1 hour	Phytohormone action.signalling peptides.NCRP (non-cysteine-rich-peptide) category.GLV/RGF/CLEL-peptide activity.RGF-precursor polypeptide
	Prupe.5G072500	Prupe.5G072500.2	Prupe.5G072500.2.p			-1.31446	0.000146563	Under	1 hour	Phytohormone action.signalling peptides.NCRP (non-cysteine-rich-peptide) category.GLV/RGF/CLEL-peptide activity.RGF-precursor polypeptide
	Prupe.5G072800	Prupe.5G072800.1	Prupe.5G072800.1.p		Bifunctional inhibitor/lipid-transfer protein/seed storage 2S albumin superfamily protein	-1.61507	0.00975392	Under	1 hour	not assigned.annotated
	Prupe.5G073200	Prupe.5G073200.1	Prupe.5G073200.1.p		Bifunctional inhibitor/lipid-transfer protein/seed storage 2S albumin superfamily protein	-1.47258	0.0148153	Under	1 hour	not assigned.not annotated
	Prupe.5G096600	Prupe.5G096600.1	Prupe.5G096600.1.p		Protein of unknown function (DUF567)	-1.85497	0.00148073	Under	1 hour	not assigned.annotated
	Prupe.5G102100	Prupe.5G102100.1	Prupe.5G102100.1.p	EMB71,MAPKKK4,YDA	Protein kinase superfamily protein	-8.13539	6.9741e-05	Under	1 hour	Protein modification.phosphorylation.STE protein kinase superfamily.protein kinase (MAP3K-MEKK)
	Prupe.5G105100	Prupe.5G105100.1	Prupe.5G105100.1.p	B1,BCH1,BETA-OHASE 1,chy1	beta-hydroxylase 1	-1.79234	7.35303e-07	Under	1 hour	Secondary metabolism.terpenoids.carotenoid biosynthesis.xanthophylls.carotenoid hydroxylase activities.carotenoid beta-ring hydroxylase (BCH)
	Prupe.5G107200	Prupe.5G107200.4	Prupe.5G107200.4.p			-1.18883	0.017691	Under	1 hour	not assigned.not annotated
	Prupe.5G115700	Prupe.5G115700.2	Prupe.5G115700.2.p	TBL23	TRICHOME BIREFRINGENCE-LIKE 23	-8.82839	0.0378853	Under	1 hour	Cell wall organisation.hemicellulose.heteromannan.modification and degradation.mannan O-acetyltransferase (MOAT)
	Prupe.5G154500	Prupe.5G154500.3	Prupe.5G154500.3.p		Protein kinase superfamily protein	-1.75859	0.00950667	Under	1 hour	Cell cycle organisation.cell cycle control.cyclin-dependent regulation.cyclin-dependent protein kinase complex.catalytic component CDKG / Protein modification.phosphorylation.CMGC protein kinase superfamily.CDK protein kinase families.protein kinase (CDKG)
	Prupe.5G197000	Prupe.5G197000.2	Prupe.5G197000.2.p	EMB2728,RPE	D-ribulose-5-phosphate-3-epimerase	-2.38015	0.00612057	Under	1 hour	Photosynthesis.calvin cycle.phosphopentose epimerase
	Prupe.5G211200	Prupe.5G211200.1	Prupe.5G211200.1.p	AtbZIP70,bZIP70	basic leucine-zipper 70	-1.3876	0.0110163	Under	1 hour	RNA biosynthesis.transcriptional regulation.bZIP transcription factor superfamily.transcription factor (bZIP)
	Prupe.5G212500	Prupe.5G212500.1	Prupe.5G212500.1.p		Uncharacterised conserved protein UCP015417, vWA	-1.11	0.00326273	Under	1 hour	not assigned.not annotated
	Prupe.5G216400	Prupe.5G216400.1	Prupe.5G216400.1.p	CHUP1	Hydroxyproline-rich glycoprotein family protein	-1.28725	0.00523601	Under	1 hour	not assigned.annotated
	Prupe.5G233500	Prupe.5G233500.1	Prupe.5G233500.1.p			-1.21408	0.00153119	Under	1 hour	not assigned.not annotated
	Prupe.5G235700	Prupe.5G235700.1	Prupe.5G235700.1.p		Molecular chaperone Hsp40/DnaJ family protein	-7.14156	2.18733e-25	Under	1 hour	Protein homeostasis.protein quality control.plastidial Hsp70 chaperone system.co-chaperone (Hsp40)
	Prupe.5G242100	Prupe.5G242100.2	Prupe.5G242100.2.p		transcription regulator NOT2/NOT3/NOT5 family protein	-1.24064	0.0118012	Under	1 hour	RNA processing.RNA surveillance.mRNA deadenylation-dependent decay.mRNA deadenylation.CCR4-NOT complex.component NOT3/5
	Prupe.5G244600	Prupe.5G244600.2	Prupe.5G244600.2.p	ATBTF3,BTF3	basic transcription factor 3	-3.41335	0.000581053	Under	1 hour	Protein homeostasis.protein quality control.ribosome-associated chaperone activities.NAC chaperone heterodimer.subunit beta
	Prupe.6G049500	Prupe.6G049500.1	Prupe.6G049500.1.p		UDP-Glycosyltransferase superfamily protein	-1.13417	0.00233417	Under	1 hour	not assigned.annotated
	Prupe.6G055900	Prupe.6G055900.6	Prupe.6G055900.6.p	FAD8	fatty acid desaturase 8	-8.75389	0.0200134	Under	1 hour	Lipid metabolism.fatty acid biosynthesis.fatty acid desaturation.omega-3/omega-6 fatty acid desaturase (FAD2/3/6-8)
	Prupe.6G067600	Prupe.6G067600.1	Prupe.6G067600.1.p		Subtilisin-like serine endopeptidase family protein	-1.18531	0.0030591	Under	1 hour	Protein homeostasis.proteolysis.serine-type peptidase activities.S8-class protease (subtilisin) families.protease (SBT4)
	Prupe.6G097700	Prupe.6G097700.2	Prupe.6G097700.2.p	ARF4	auxin response factor 4	-1.54033	0.00256692	Under	1 hour	RNA biosynthesis.transcriptional regulation.B3 transcription factor superfamily.transcription factor (ARF)
	Prupe.6G128700	Prupe.6G128700.1	Prupe.6G128700.1.p			-2.05318	0.0139146	Under	1 hour	not assigned.not annotated
	Prupe.6G159200	Prupe.6G159200.1	Prupe.6G159200.1.p	EDA33,GT140,IND,IND1	basic helix-loop-helix (bHLH) DNA-binding superfamily protein	-1.30999	0.00228981	Under	1 hour	RNA biosynthesis.transcriptional regulation.transcription factor (bHLH)
	Prupe.6G177100	Prupe.6G177100.2	Prupe.6G177100.2.p	AGT2	alanine:glyoxylate aminotransferase 2	-2.48338	8.48457e-08	Under	1 hour	Nucleotide metabolism.pyrimidines.catabolism.alanine aminotransferase (PYD4)
	Prupe.6G231800	Prupe.6G231800.3	Prupe.6G231800.3.p		Plant protein of unknown function (DUF869)	-1.21974	0.0178244	Under	1 hour	not assigned.annotated
	Prupe.6G251600	Prupe.6G251600.1	Prupe.6G251600.1.p	ATCHX20,CHX20	cation/H+ exchanger 20	-1.90154	0.00696327	Under	1 hour	Solute transport.carrier-mediated transport.CPA superfamily.CPA-2 family.proton:monovalent cation antiporter (CHX)
	Prupe.6G260100	Prupe.6G260100.1	Prupe.6G260100.1.p			-1.06433	0.0207814	Under	1 hour	not assigned.not annotated
	Prupe.6G262300	Prupe.6G262300.1	Prupe.6G262300.1.p	P5CS2	delta 1-pyrroline-5-carboxylate synthase 2	-1.94513	9.46951e-07	Under	1 hour	Amino acid metabolism.biosynthesis.glutamate family.glutamate-derived amino acids.proline.main pathway.pyrroline-5-carboxylate synthetase
	Prupe.6G262300	Prupe.6G262300.5	Prupe.6G262300.5.p	P5CS2	delta 1-pyrroline-5-carboxylate synthase 2	-1.95181	0.0163416	Under	1 hour	Amino acid metabolism.biosynthesis.glutamate family.glutamate-derived amino acids.proline.main pathway.pyrroline-5-carboxylate synthetase
	Prupe.6G265500	Prupe.6G265500.1	Prupe.6G265500.1.p		Ctr copper transporter family	-1.1995	4.586e-05	Under	1 hour	Solute transport.channels.copper cation channel (COPT) / Nutrient uptake.copper uptake.reduction-based uptake.copper transporter (COPT)
	Prupe.6G271900	Prupe.6G271900.1	Prupe.6G271900.1.p			-1.55047	0.00137213	Under	1 hour	not assigned.not annotated
	Prupe.6G278100	Prupe.6G278100.1	Prupe.6G278100.1.p		DNAJ heat shock family protein	-1.14334	1.2022e-06	Under	1 hour	not assigned.annotated
	Prupe.6G290900	Prupe.6G290900.1	Prupe.6G290900.1.p	ATOFP2,OFP2	ovate family protein 2	-1.31686	3.39824e-05	Under	1 hour	RNA biosynthesis.transcriptional regulation.transcription factor (OFP)
	Prupe.6G313000	Prupe.6G313000.1	Prupe.6G313000.1.p	ATNAS3,NAS3	nicotianamine synthase 3	-1.19324	2.57747e-06	Under	1 hour	Nutrient uptake.iron uptake.chelation-based strategy uptake.phytosiderophore biosynthesis.nicotianamine synthase
	Prupe.7G017300	Prupe.7G017300.4	Prupe.7G017300.4.p		Major facilitator superfamily protein	-1.51518	0.0448253	Under	1 hour	Solute transport.carrier-mediated transport.MFS superfamily.anion transporter (NRT1/PTR)
	Prupe.7G041600	Prupe.7G041600.1	Prupe.7G041600.1.p	ARR9,ATRR4	response regulator 9	-1.0187	0.00035882	Under	1 hour	Phytohormone action.cytokinin.perception and signal transduction.A-type ARR response negative regulator
	Prupe.7G062400	Prupe.7G062400.1	Prupe.7G062400.1.p			-1.20824	0.000115783	Under	1 hour	not assigned.not annotated
	Prupe.7G076700	Prupe.7G076700.4	Prupe.7G076700.4.p		Plastid-lipid associated protein PAP / fibrillin family protein	-3.1388	0.00352536	Under	1 hour	not assigned.annotated
	Prupe.7G091600	Prupe.7G091600.2	Prupe.7G091600.2.p	FOLB1	Dihydroneopterin aldolase	-4.37819	6.78813e-06	Under	1 hour	Coenzyme metabolism.tetrahydrofolate biosynthesis.pterin biosynthesis.dihydroneopterin aldolase
	Prupe.7G098500	Prupe.7G098500.1	Prupe.7G098500.1.p	ATOFP13,OFP13	ovate family protein 13	-2.83627	0.00400823	Under	1 hour	RNA biosynthesis.transcriptional regulation.transcription factor (OFP)
	Prupe.7G140900	Prupe.7G140900.1	Prupe.7G140900.1.p	ATMES10,MES10	methyl esterase 10	-1.38653	0.000372314	Under	1 hour	not assigned.annotated
	Prupe.7G165900	Prupe.7G165900.1	Prupe.7G165900.1.p		Lactoylglutathione lyase / glyoxalase I family protein	-1.47367	0.0107261	Under	1 hour	not assigned.not annotated
	Prupe.7G190400	Prupe.7G190400.1	Prupe.7G190400.1.p		Plant invertase/pectin methylesterase inhibitor superfamily	-1.44451	5.61424e-05	Under	1 hour	Cell wall organisation.pectin.homogalacturonan.modification and degradation.pectin methylesterase
	Prupe.7G201600	Prupe.7G201600.1	Prupe.7G201600.1.p	ATMYB12,MYB12,PFG1	myb domain protein 12	-1.25732	0.0200305	Under	1 hour	RNA biosynthesis.transcriptional regulation.MYB transcription factor superfamily.transcription factor (MYB)
	Prupe.7G205400	Prupe.7G205400.8	Prupe.7G205400.8.p		U-box domain-containing protein kinase family protein	-7.19325	0.00667368	Under	1 hour	Protein modification.phosphorylation.TKL protein kinase superfamily.RLCK-IX receptor-like protein kinase families.receptor-like protein kinase (RLCK-IXb)
	Prupe.7G216500	Prupe.7G216500.1	Prupe.7G216500.1.p	GGT3,GGT4	gamma-glutamyl transpeptidase 4	-1.00377	2.97895e-06	Under	1 hour	Protein homeostasis.proteolysis.threonine-type peptidase activities.T3-class gamma-glutamyl transpeptidase (GGT)
	Prupe.7G228000	Prupe.7G228000.11	Prupe.7G228000.11.p		Serinc-domain containing serine and sphingolipid biosynthesis protein	-1.11428	0.0259715	Under	1 hour	not assigned.not annotated
	Prupe.7G242000	Prupe.7G242000.1	Prupe.7G242000.1.p		Major facilitator superfamily protein	-2.26008	3.14921e-08	Under	1 hour	Solute transport.carrier-mediated transport.MFS superfamily.anion transporter (NRT1/PTR)
	Prupe.7G252700	Prupe.7G252700.1	Prupe.7G252700.1.p	MCM5	Minichromosome maintenance (MCM2/3/5) family protein	-1.26082	3.37762e-06	Under	1 hour	Cell cycle organisation.DNA replication.preinitiation.MCM replicative DNA helicase complex.component MCM5
	Prupe.7G256100	Prupe.7G256100.1	Prupe.7G256100.1.p			-1.01158	0.032501	Under	1 hour	Phytohormone action.signalling peptides.NCRP (non-cysteine-rich-peptide) category.GLV/RGF/CLEL-peptide activity.RGF-precursor polypeptide
	Prupe.8G024200	Prupe.8G024200.1	Prupe.8G024200.1.p		Mitochondrial substrate carrier family protein	-1.3948	0.00305739	Under	1 hour	Solute transport.carrier-mediated transport.solute transporter (MTCC)
	Prupe.8G072700	Prupe.8G072700.5	Prupe.8G072700.5.p		Ribosomal protein L12 family protein	-8.27377	0.0389594	Under	1 hour	Protein biosynthesis.organelle machinery.mitochondrial ribosome.large ribosomal subunit proteome.component mtRPL7/L12
	Prupe.8G078700	Prupe.8G078700.1	Prupe.8G078700.1.p		SAUR-like auxin-responsive protein family	-1.84788	9.97309e-05	Under	1 hour	not assigned.annotated
	Prupe.8G079700	Prupe.8G079700.1	Prupe.8G079700.1.p		SAUR-like auxin-responsive protein family	-1.03846	0.00213071	Under	1 hour	not assigned.annotated
	Prupe.8G080100	Prupe.8G080100.1	Prupe.8G080100.1.p		SAUR-like auxin-responsive protein family	-1.28554	1.21185e-11	Under	1 hour	not assigned.annotated
	Prupe.8G080200	Prupe.8G080200.1	Prupe.8G080200.1.p		SAUR-like auxin-responsive protein family	-1.21675	0.00119349	Under	1 hour	not assigned.annotated
	Prupe.8G080700	Prupe.8G080700.1	Prupe.8G080700.1.p		SAUR-like auxin-responsive protein family	-1.30943	1.20303e-07	Under	1 hour	not assigned.annotated
	Prupe.8G080800	Prupe.8G080800.1	Prupe.8G080800.1.p		SAUR-like auxin-responsive protein family	-1.20122	0.00010357	Under	1 hour	not assigned.annotated
	Prupe.8G081100	Prupe.8G081100.1	Prupe.8G081100.1.p		SAUR-like auxin-responsive protein family	-1.26555	0.00145579	Under	1 hour	not assigned.annotated
	Prupe.8G081300	Prupe.8G081300.1	Prupe.8G081300.1.p		SAUR-like auxin-responsive protein family	-1.59134	2.34639e-11	Under	1 hour	not assigned.annotated
	Prupe.8G081400	Prupe.8G081400.1	Prupe.8G081400.1.p		SAUR-like auxin-responsive protein family	-1.42939	0.00028674	Under	1 hour	not assigned.annotated
	Prupe.8G081700	Prupe.8G081700.1	Prupe.8G081700.1.p		SAUR-like auxin-responsive protein family	-1.03065	0.000599118	Under	1 hour	not assigned.annotated
	Prupe.8G087900	Prupe.8G087900.1	Prupe.8G087900.1.p	STH2	salt tolerance homolog2	-1.28658	0.000468538	Under	1 hour	RNA biosynthesis.transcriptional regulation.C2C2 transcription factor superfamily.transcription factor (BBX-DBB)
	Prupe.8G088400	Prupe.8G088400.1	Prupe.8G088400.1.p	MCM4	Minichromosome maintenance (MCM2/3/5) family protein	-1.56875	0.0033267	Under	1 hour	Cell cycle organisation.DNA replication.preinitiation.MCM replicative DNA helicase complex.component MCM4
	Prupe.8G116200	Prupe.8G116200.2	Prupe.8G116200.2.p		Homeodomain-like superfamily protein	-6.01774	0.00271338	Under	1 hour	not assigned.annotated
	Prupe.8G119200	Prupe.8G119200.2	Prupe.8G119200.2.p		C2H2 and C2HC zinc fingers superfamily protein	-7.30297	0.0272874	Under	1 hour	not assigned.annotated
	Prupe.8G134200	Prupe.8G134200.2	Prupe.8G134200.2.p	ATNHD1,NHD1	sodium:hydrogen antiporter 1	-8.42823	0.0148547	Under	1 hour	Solute transport.carrier-mediated transport.IT superfamily.proton:sodium cation antiporter (NHD)
	Prupe.8G168700	Prupe.8G168700.3	Prupe.8G168700.3.p		Protein of unknown function (DUF616)	-9.00378	0.0372851	Under	1 hour	not assigned.not annotated
	Prupe.8G181100	Prupe.8G181100.1	Prupe.8G181100.1.p	XCP1	xylem cysteine peptidase 1	-1.06532	0.0122261	Under	1 hour	Protein homeostasis.proteolysis.cysteine-type peptidase activities.C1-class protease (Papain) / Multi-process regulation.Programmed Cell Death (PCD) system.PCD cysteine protease (XCP)
	Prupe.8G200800	Prupe.8G200800.2	Prupe.8G200800.2.p		GPI transamidase component Gpi16 subunit family protein	-9.68913	0.0343667	Under	1 hour	Protein modification.lipidation.glycophosphatidylinositol (GPI) anchor addition.GPI transamidase complex.component PIG-T
	Prupe.8G204700	Prupe.8G204700.1	Prupe.8G204700.1.p	ATSDI1	Tetratricopeptide repeat (TPR)-like superfamily protein	-2.81491	0.00157475	Under	1 hour	not assigned.annotated
	Prupe.8G204900	Prupe.8G204900.1	Prupe.8G204900.1.p		Galactose oxidase/kelch repeat superfamily protein	-1.14595	0.0061104	Under	1 hour	Protein homeostasis.ubiquitin-proteasome system.ubiquitin-fold protein conjugation.Cullin-based ubiquitylation complexes.SKP1-CUL1-FBX (SCF) E3 ligase complexes.F-BOX substrate adaptor components.component FBX
	Prupe.8G225100	Prupe.8G225100.1	Prupe.8G225100.1.p	DMR6	2-oxoglutarate (2OG) and Fe(II)-dependent oxygenase superfamily protein	-1.55476	0.0403794	Under	1 hour	Enzyme classification.EC_1 oxidoreductases.EC_1.14 oxidoreductase acting on paired donor with incorporation or reduction of molecular oxygen
	Prupe.8G256600	Prupe.8G256600.1	Prupe.8G256600.1.p	ATGSTF13	Glutathione S-transferase family protein	-1.30482	0.00126284	Under	1 hour	Protein modification.S-glutathionylation.glutathione S-transferase activities.class phi glutathione S-transferase
	Prupe.8G260300	Prupe.8G260300.1	Prupe.8G260300.1.p	ATGSTF13	Glutathione S-transferase family protein	-2.67112	2.30395e-06	Under	1 hour	not assigned.annotated
	Prupe.1G021800	Prupe.1G021800.1	Prupe.1G021800.1.p	ELIP,ELIP1	Chlorophyll A-B binding family protein	1.74385	0.000652935	Over	3 hour	Photosynthesis.photophosphorylation.photosystem II.LHC-related protein groups.three-helix LHC-related protein group.protein (ELIP)			!!!
	Prupe.1G090500	Prupe.1G090500.1	Prupe.1G090500.1.p	UGT78D2	UDP-glucosyl transferase 78D2	2.11558	0.00729514	Over	3 hour	Secondary metabolism.phenolics.flavonoid biosynthesis.flavonol glycosides.flavonol-3-O-rhamnosyltransferase			!!!
	Prupe.1G091100	Prupe.1G091100.1	Prupe.1G091100.1.p	UGT78D2	UDP-glucosyl transferase 78D2	1.89327	3.59755e-13	Over	3 hour	Secondary metabolism.phenolics.flavonoid biosynthesis.flavonol glycosides.flavonol-3-O-rhamnosyltransferase			!!!
	Prupe.1G091200	Prupe.1G091200.1	Prupe.1G091200.1.p	UGT78D2	UDP-glucosyl transferase 78D2	1.7451	2.55314e-11	Over	3 hour	not assigned.annotated			!!!
	Prupe.1G116300	Prupe.1G116300.1	Prupe.1G116300.1.p		GDSL-like Lipase/Acylhydrolase superfamily protein	5.13813	0.00239982	Over	3 hour	not assigned.annotated			!!!
	Prupe.1G181000	Prupe.1G181000.1	Prupe.1G181000.1.p		UDP-Glycosyltransferase superfamily protein	1.42893	0.0188458	Over	3 hour	Enzyme classification.EC_2 transferases.EC_2.4 glycosyltransferase			!!!
	Prupe.1G208500	Prupe.1G208500.1	Prupe.1G208500.1.p	HYH	HY5-homolog	1.82596	1.49394e-06	Over	3 hour	RNA biosynthesis.transcriptional regulation.bZIP transcription factor superfamily.transcription factor (bZIP)/RNA biosynthesis.transcriptional regulation.bZIP transcription factor superfamily.transcription factor (HY5)/ External stimuli response.light.UV-B light.transcriptional regulator (HY5)/External stimuli response.light.UV-B light.transcriptional regulator (HY5)			!!!
	Prupe.1G208500	Prupe.1G208500.2	Prupe.1G208500.2.p	HYH	HY5-homolog	2.01907	0.0106351	Over	3 hour	RNA biosynthesis.transcriptional regulation.bZIP transcription factor superfamily.transcription factor (bZIP)/RNA biosynthesis.transcriptional regulation.bZIP transcription factor superfamily.transcription factor (HY5)			!!!
	Prupe.1G237100	Prupe.1G237100.1	Prupe.1G237100.1.p		HXXXD-type acyl-transferase family protein	1.46463	0.00914051	Over	3 hour	Enzyme classification.EC_2 transferases.EC_2.3 acyltransferase			!!!
	Prupe.1G307800	Prupe.1G307800.1	Prupe.1G307800.1.p			1.81838	0.00543234	Over	3 hour	not assigned.not annotated			!!!
	Prupe.1G316700	Prupe.1G316700.1	Prupe.1G316700.1.p			1.4395	0.0340439	Over	3 hour	not assigned.not annotated			!!!
	Prupe.1G406100	Prupe.1G406100.1	Prupe.1G406100.1.p	ATMSL10,MSL10	mechanosensitive channel of small conductance-like 10	1.14371	0.0222508	Over	3 hour	Solute transport.channels.mechanosensitive ion channel (MSL)			!!!
	Prupe.1G420700	Prupe.1G420700.1	Prupe.1G420700.1.p		alpha/beta-Hydrolases superfamily protein	1.19989	2.37477e-05	Over	3 hour	Enzyme classification.EC_2 transferases.EC_2.3 acyltransferase			!!!
	Prupe.1G437200	Prupe.1G437200.1	Prupe.1G437200.1.p			2.43821	0.0284377	Over	3 hour	not assigned.not annotated			!!!
	Prupe.1G478400	Prupe.1G478400.1	Prupe.1G478400.1.p	HY5,TED 5	Basic-leucine zipper (bZIP) transcription factor family protein	1.48024	1.74395e-06	Over	3 hour	RNA biosynthesis.transcriptional regulation.bZIP transcription factor superfamily.transcription factor (bZIP)/RNA biosynthesis.transcriptional regulation.bZIP transcription factor superfamily.transcription factor (HY5) /External stimuli response.light.UV-B light.transcriptional regulator (HY5)			!!!
	Prupe.1G478500	Prupe.1G478500.1	Prupe.1G478500.1.p			1.43428	9.48609e-05	Over	3 hour	not assigned.not annotated			!!!
	Prupe.1G494200	Prupe.1G494200.3	Prupe.1G494200.3.p	ARR9,ATRR4	response regulator 9	6.33289	0.00903844	Over	3 hour	Phytohormone action.cytokinin.perception and signal transduction.A-type ARR response negative regulator			!!!
	Prupe.1G502800	Prupe.1G502800.1	Prupe.1G502800.1.p	ATFLS1,FLS,FLS1	flavonol synthase 1	4.46755	7.06544e-13	Over	3 hour	Secondary metabolism.phenolics.flavonoid biosynthesis.flavonols.flavonol synthase			!!!
	Prupe.1G510200	Prupe.1G510200.4	Prupe.1G510200.4.p		Galactose oxidase/kelch repeat superfamily protein	7.31511	0.0378722	Over	3 hour	not assigned.annotated			!!!
	Prupe.2G153700	Prupe.2G153700.1	Prupe.2G153700.1.p			1.17872	6.08989e-18	Over	3 hour	Solute transport.carrier-mediated transport.VIT family.metal cation transporter (VIT) / Nutrient uptake.iron uptake.iron storage.iron transporter (VIT)			!!!
	Prupe.2G192900	Prupe.2G192900.3	Prupe.2G192900.3.p		DNA-directed RNA polymerase, subunit M, archaeal	2.57371	0.0179298	Over	3 hour	not assigned.not annotated			!!!
	Prupe.2G197000	Prupe.2G197000.1	Prupe.2G197000.1.p			2.25648	1.85383e-07	Over	3 hour	not assigned.not annotated			!!!
	Prupe.2G263300	Prupe.2G263300.1	Prupe.2G263300.1.p			1.41124	1.67054e-09	Over	3 hour	not assigned.not annotated			!!!
	Prupe.2G263900	Prupe.2G263900.1	Prupe.2G263900.1.p		Chalcone-flavanone isomerase family protein	1.80978	1.80475e-05	Over	3 hour	not assigned.annotated			!!!
	Prupe.2G293400	Prupe.2G293400.1	Prupe.2G293400.1.p		Transducin/WD40 repeat-like superfamily protein	2.20579	0.0418163	Over	3 hour	External stimuli response.light.UV-B light.regulatory protein (RUP)			!!!
	Prupe.2G294400	Prupe.2G294400.2	Prupe.2G294400.2.p	LTI65,RD29B	CAP160 protein	2.90152	0.0363805	Over	3 hour	not assigned.annotated			!!!
	Prupe.2G297800	Prupe.2G297800.1	Prupe.2G297800.1.p			1.18487	0.00129867	Over	3 hour	not assigned.not annotated			!!!
	Prupe.2G299000	Prupe.2G299000.1	Prupe.2G299000.1.p	ATDTX35,DTX35,FFT	detoxifying efflux carrier 35	4.45465	0.0184446	Over	3 hour	Solute transport.carrier-mediated transport.MOP superfamily.MATE family.metabolite transporter (DTX)			!!!
	Prupe.2G319500	Prupe.2G319500.1	Prupe.2G319500.1.p	ATTTG1,TTG,TTG1,URM23	Transducin/WD40 repeat-like superfamily protein	1.54842	0.00110077	Over	3 hour	not assigned.annotated			!!!
	Prupe.2G320100	Prupe.2G320100.2	Prupe.2G320100.2.p			1.25672	0.000120917	Over	3 hour	not assigned.not annotated			!!!
	Prupe.2G327600	Prupe.2G327600.1	Prupe.2G327600.1.p			2.06744	7.49173e-06	Over	3 hour	not assigned.annotated			!!!
	Prupe.3G028000	Prupe.3G028000.1	Prupe.3G028000.1.p			2.11411	1.54368e-06	Over	3 hour	not assigned.not annotated			!!!
	Prupe.3G085200	Prupe.3G085200.1	Prupe.3G085200.1.p		HSP20-like chaperones superfamily protein	2.07857	0.0481845	Over	3 hour	Protein homeostasis.protein quality control.smallHsp holdase chaperone activities.class-M-II protein			!!!
	Prupe.3G108700	Prupe.3G108700.2	Prupe.3G108700.2.p	AT-HSFA4C,HSFA4C,RHA1	winged-helix DNA-binding transcription factor family protein	1.22955	0.0051909	Over	3 hour	RNA biosynthesis.transcriptional regulation.transcription factor (HSF)			!!!
	Prupe.3G171800	Prupe.3G171800.1	Prupe.3G171800.1.p	XTH16	xyloglucan endotransglucosylase/hydrolase 16	2.21356	0.00606049	Over	3 hour	Enzyme classification.EC_2 transferases.EC_2.4 glycosyltransferase			!!!
	Prupe.3G253900	Prupe.3G253900.1	Prupe.3G253900.1.p		HXXXD-type acyl-transferase family protein	2.24933	8.75658e-13	Over	3 hour	Enzyme classification.EC_2 transferases.EC_2.3 acyltransferase			!!!
	Prupe.4G013500	Prupe.4G013500.1	Prupe.4G013500.1.p	ATCOP1,COP1,DET340,EMB168,FUS1	Transducin/WD40 repeat-like superfamily protein	1.12021	2.9409e-08	Over	3 hour	Protein homeostasis.ubiquitin-proteasome system.ubiquitin-fold protein conjugation.Cullin-based ubiquitylation complexes.CUL4-DDB1 ubiquitination complexes.COP1-SPA substrate adaptor subcomplex.component COP1 / External stimuli response.light.red/far red light.CUL4-DDB1 ubiquitination complex.COP1-SPA substrate adaptor subcomplex.component COP1			!!!
	Prupe.4G044300	Prupe.4G044300.1	Prupe.4G044300.1.p		CBS domain-containing protein	1.41441	5.77692e-11	Over	3 hour	not assigned.annotated			!!!
	Prupe.4G057300	Prupe.4G057300.1	Prupe.4G057300.1.p	ATNUDT15,ATNUDX15,NUDX15	nudix hydrolase homolog 15	1.18044	9.60947e-11	Over	3 hour	not assigned.annotated			!!!
	Prupe.4G057600	Prupe.4G057600.1	Prupe.4G057600.1.p		HXXXD-type acyl-transferase family protein	2.49926	8.75774e-13	Over	3 hour	Enzyme classification.EC_2 transferases.EC_2.3 acyltransferase			!!!
	Prupe.4G069700	Prupe.4G069700.6	Prupe.4G069700.6.p		Leucine-rich repeat transmembrane protein kinase	6.774	0.0412657	Over	3 hour	Protein modification.phosphorylation.TKL protein kinase superfamily.LRR-VIII protein kinase families.protein kinase (LRR-VIII-2)			!!!
	Prupe.4G070500	Prupe.4G070500.2	Prupe.4G070500.2.p	AG	K-box region and MADS-box transcription factor family protein	9.28625	2.45763e-18	Over	3 hour	RNA biosynthesis.transcriptional regulation.transcription factor (MADS/AGL)			!!!
	Prupe.4G210600	Prupe.4G210600.1	Prupe.4G210600.1.p	FAD4,FADA	fatty acid desaturase A	2.05298	0.000205148	Over	3 hour	Lipid metabolism.fatty acid biosynthesis.fatty acid desaturation.delta 3-trans-hexadecenoic acid phosphatidylglycerol desaturase (FAD4)			!!!
	Prupe.4G229700	Prupe.4G229700.1	Prupe.4G229700.1.p		RmlC-like cupins superfamily protein	1.64546	6.62594e-05	Over	3 hour	not assigned.annotated			!!!
	Prupe.5G014600	Prupe.5G014600.5	Prupe.5G014600.5.p			3.36416	0.0447142	Over	3 hour	not assigned.not annotated			!!!
	Prupe.5G090100	Prupe.5G090100.1	Prupe.5G090100.1.p	DDF1	Integrase-type DNA-binding superfamily protein	2.34889	0.0499746	Over	3 hour	RNA biosynthesis.transcriptional regulation.AP2/ERF transcription factor superfamily.transcription factor (DREB) / External stimuli response.temperature.cold response.ICE-CBF cold acclimation transcriptional cascade.transcription factor (CBF/DREB1)			!!!
	Prupe.5G116000	Prupe.5G116000.1	Prupe.5G116000.1.p			1.06962	0.0153927	Over	3 hour	not assigned.not annotated			!!!
	Prupe.5G181900	Prupe.5G181900.1	Prupe.5G181900.1.p	PTAC2	plastid transcriptionally active 2	4.33517	1.70103e-05	Over	3 hour	RNA biosynthesis.organelle machinery.RNA polymerase activities.plastid-encoded RNA polymerase (PEP) complex.essential co-factor components.component PAP2/TAC2			!!!
	Prupe.5G198700	Prupe.5G198700.1	Prupe.5G198700.1.p		zinc finger (C3HC4-type RING finger) family protein	1.4977	1.11432e-09	Over	3 hour	Protein homeostasis.proteolysis.serine-type peptidase activities.S16-class protease (LON)			!!!
	Prupe.5G229000	Prupe.5G229000.1	Prupe.5G229000.1.p		S-adenosyl-L-methionine-dependent methyltransferases superfamily protein	1.36484	0.00479428	Over	3 hour	Enzyme classification.EC_2 transferases.EC_2.1 transferase transferring one-carbon group			!!!
	Prupe.6G022600	Prupe.6G022600.5	Prupe.6G022600.5.p		Putative glycosyl hydrolase of unknown function (DUF1680)	1.78324	0.0028067	Over	3 hour	not assigned.not annotated			!!!
	Prupe.6G072300	Prupe.6G072300.1	Prupe.6G072300.1.p			1.05194	0.023111	Over	3 hour	Cell cycle organisation.cell cycle control.cyclin-dependent regulation.cyclin-dependent protein kinase inhibitor activities.inhibitor (SIM)			!!!
	Prupe.6G090900	Prupe.6G090900.1	Prupe.6G090900.1.p	ATRAD51B,RAD51B	DNA repair (Rad51) family protein	8.01251	0.000250653	Over	3 hour	not assigned.annotated			!!!
	Prupe.6G093600	Prupe.6G093600.8	Prupe.6G093600.8.p			5.55584	0.0389377	Over	3 hour	not assigned.not annotated			!!!
	Prupe.6G129600	Prupe.6G129600.1	Prupe.6G129600.1.p			3.86075	0.000722246	Over	3 hour	not assigned.annotated			!!!
	Prupe.6G139000	Prupe.6G139000.1	Prupe.6G139000.1.p			1.65955	4.9534e-09	Over	3 hour	not assigned.not annotated			!!!
	Prupe.6G153300	Prupe.6G153300.1	Prupe.6G153300.1.p		Disease resistance protein (CC-NBS-LRR class) family	1.14641	0.0148839	Over	3 hour	not assigned.annotated			!!!
	Prupe.6G173300	Prupe.6G173300.1	Prupe.6G173300.1.p	SEP2	stress enhanced protein 2	1.13582	2.43569e-05	Over	3 hour	Photosynthesis.photophosphorylation.photosystem II.LHC-related protein groups.two-helix LHC-related protein group.protein (SEP2)			!!!
	Prupe.6G211300	Prupe.6G211300.2	Prupe.6G211300.2.p		UDP-Glycosyltransferase superfamily protein	9.37232	5.59786e-10	Over	3 hour	not assigned.annotated			!!!
	Prupe.6G240100	Prupe.6G240100.1	Prupe.6G240100.1.p	IMPA-9	importin alpha isoform 9	9.35567	0.00799542	Over	3 hour	Protein translocation.nucleus.nucleocytoplasmic transport.importin alpha adaptor proteins			!!!
	Prupe.6G241600	Prupe.6G241600.1	Prupe.6G241600.1.p	CRM3,HCF152	Tetratricopeptide repeat (TPR)-like superfamily protein	1.45925	0.000873174	Over	3 hour	RNA processing.organelle machinery.RNA stability.transcript stability factor (HCF152)			!!!
	Prupe.6G268400	Prupe.6G268400.1	Prupe.6G268400.1.p	SOUL-1	SOUL heme-binding family protein	1.28789	1.93644e-06	Over	3 hour	not assigned.annotated			!!!
	Prupe.6G289800	Prupe.6G289800.1	Prupe.6G289800.1.p			1.96568	0.000155503	Over	3 hour	not assigned.not annotated			!!!
	Prupe.6G355500	Prupe.6G355500.2	Prupe.6G355500.2.p	ATPUB9,PUB9	plant U-box 9	7.97236	0.0447434	Over	3 hour	Protein homeostasis.ubiquitin-proteasome system.ubiquitin-fold protein conjugation.ubiquitin conjugation (ubiquitylation).ubiquitin-ligase E3 activities.U-Box E3 ligase activities.E3 ubiquitin ligase (PUB)			!!!
	Prupe.7G021900	Prupe.7G021900.3	Prupe.7G021900.3.p	ABC1,ATSIG1,ATSIG2,SIG1,SIG2,SIGA,SIGB	RNApolymerase sigma subunit 2	7.79641	9.62161e-07	Over	3 hour	RNA biosynthesis.organelle machinery.transcriptional regulation.basal transcription factor (Sigma)			!!!
	Prupe.7G097500	Prupe.7G097500.6	Prupe.7G097500.6.p			6.98072	0.0375871	Over	3 hour	not assigned.annotated			!!!
	Prupe.7G110700	Prupe.7G110700.2	Prupe.7G110700.2.p			2.14693	3.82787e-07	Over	3 hour	not assigned.annotated			!!!
	Prupe.7G111200	Prupe.7G111200.5	Prupe.7G111200.5.p		F-box/RNI-like superfamily protein	9.93015	0.00290109	Over	3 hour	Protein homeostasis.ubiquitin-proteasome system.ubiquitin-fold protein conjugation.Cullin-based ubiquitylation complexes.SKP1-CUL1-FBX (SCF) E3 ligase complexes.F-BOX substrate adaptor components.component FBX			!!!
	Prupe.7G117600	Prupe.7G117600.1	Prupe.7G117600.1.p		O-acyltransferase (WSD1-like) family protein	1.92148	0.0304684	Over	3 hour	not assigned.annotated			!!!
	Prupe.7G119300	Prupe.7G119300.1	Prupe.7G119300.1.p			2.29232	0.00946037	Over	3 hour	not assigned.not annotated			!!!
	Prupe.7G123200	Prupe.7G123200.1	Prupe.7G123200.1.p		RING/U-box superfamily protein	1.39659	0.0259747	Over	3 hour	Protein homeostasis.ubiquitin-proteasome system.ubiquitin-fold protein conjugation.ubiquitin conjugation (ubiquitylation).ubiquitin-ligase E3 activities.RING-domain E3 ligase activities.RING-H2-class E3 ligase			!!!
	Prupe.7G157100	Prupe.7G157100.1	Prupe.7G157100.1.p		alpha/beta-Hydrolases superfamily protein	1.04437	0.023111	Over	3 hour	not assigned.annotated			!!!
	Prupe.7G193200	Prupe.7G193200.1	Prupe.7G193200.1.p	ATPRX Q	Thioredoxin superfamily protein	1.57657	0.000250653	Over	3 hour	Redox homeostasis.chloroplast redox homeostasis.2-Cys peroxiredoxin activities.atypical 2-Cys peroxiredoxin (PrxQ)			!!!
	Prupe.7G196100	Prupe.7G196100.2	Prupe.7G196100.2.p		inter-alpha-trypsin inhibitor heavy chain-related	7.81454	0.0138633	Over	3 hour	not assigned.not annotated			!!!
	Prupe.7G228300	Prupe.7G228300.1	Prupe.7G228300.1.p	SULTR3;5	sulfate transporter 3;5	1.26394	0.0188458	Over	3 hour	Solute transport.carrier-mediated transport.APC superfamily.SulP family.sulfate transporter (SULTR)			!!!
	Prupe.8G041900	Prupe.8G041900.2	Prupe.8G041900.2.p		NAD(P)-binding Rossmann-fold superfamily protein	1.74597	0.0417695	Over	3 hour	not assigned.annotated			!!!
	Prupe.8G137000	Prupe.8G137000.1	Prupe.8G137000.1.p			4.18733	2.56762e-05	Over	3 hour	not assigned.not annotated			!!!
	Prupe.8G180700	Prupe.8G180700.1	Prupe.8G180700.1.p	PHT3;3	phosphate transporter 3;3	1.15692	0.000385986	Over	3 hour	Solute transport.carrier-mediated transport.solute transporter (MTCC)			!!!
	Prupe.8G192500	Prupe.8G192500.2	Prupe.8G192500.2.p		Auxin-responsive family protein	1.31211	0.0129625	Over	3 hour	not assigned.annotated			!!!
	Prupe.8G196000	Prupe.8G196000.2	Prupe.8G196000.2.p		Oxidoreductase, zinc-binding dehydrogenase family protein	1.63489	8.97281e-14	Over	3 hour	not assigned.annotated			!!!
	Prupe.8G221200	Prupe.8G221200.1	Prupe.8G221200.1.p		P-loop containing nucleoside triphosphate hydrolases superfamily protein	1.82393	2.83499e-24	Over	3 hour	not assigned.annotated			!!!
	Prupe.8G270000	Prupe.8G270000.1	Prupe.8G270000.1.p	ATMYB12,MYB12,PFG1	myb domain protein 12	2.73711	6.10957e-16	Over	3 hour	RNA biosynthesis.transcriptional regulation.MYB transcription factor superfamily.transcription factor (MYB)			!!!
	Prupe.I005700	Prupe.I005700.1	Prupe.I005700.1.p	ATCHS,CHS,TT4	Chalcone and stilbene synthase family protein	3.41738	4.25731e-09	Over	3 hour	Enzyme classification.EC_2 transferases.EC_2.3 acyltransferase			!!!
	Prupe.1G389600	Prupe.1G389600.8	Prupe.1G389600.8.p	OSB1	Primosome PriB/single-strand DNA-binding	-8.39749	0.025519	Under	3 hour	Cell cycle organisation.organellar DNA replication.single-stranded DNA (ssDNA) maintenance.ssDNA-binding protein (OSB)			!!!
	Prupe.1G553900	Prupe.1G553900.2	Prupe.1G553900.2.p		Transcription elongation factor (TFIIS) family protein	-1.46347	0.00960979	Under	3 hour	not assigned.not annotated			!!!
	Prupe.1G588300	Prupe.1G588300.3	Prupe.1G588300.3.p			-7.66667	0.00121618	Under	3 hour	not assigned.not annotated			!!!
	Prupe.2G057600	Prupe.2G057600.3	Prupe.2G057600.3.p		disease resistance protein (TIR-NBS-LRR class), putative	-7.95267	0.0141958	Under	3 hour	External stimuli response.pathogen.effector-triggered immunity (ETI) network.effector receptor (NLR)			!!!
	Prupe.2G185300	Prupe.2G185300.1	Prupe.2G185300.1.p	UBQ10	polyubiquitin 10	-1.37264	0.000734127	Under	3 hour	Protein homeostasis.ubiquitin-proteasome system.ubiquitin-fold protein conjugation.ubiquitin conjugation (ubiquitylation).ubiquitin-fold protein (UBQ)			!!!
	Prupe.2G218100	Prupe.2G218100.2	Prupe.2G218100.2.p		Pentatricopeptide repeat (PPR) superfamily protein	-8.94175	0.0115626	Under	3 hour	not assigned.annotated			!!!
	Prupe.2G227500	Prupe.2G227500.5	Prupe.2G227500.5.p	ATMTP11,MTP11	Cation efflux family protein	-1.12269	0.0412657	Under	3 hour	Solute transport.carrier-mediated transport.CDF superfamily.CDF family.manganese cation transporter (Mn-CDF)			!!!
	Prupe.3G304100	Prupe.3G304100.1	Prupe.3G304100.1.p	MPL1	Myzus persicae-induced lipase 1	-1.32713	0.00288869	Under	3 hour	Lipid metabolism.lipid degradation.triacylglycerol lipase activities.diacyl-/triacylglycerol lipase activities.lipase (LIP)			!!!
	Prupe.4G185600	Prupe.4G185600.1	Prupe.4G185600.1.p	GCR2,GPCR	G protein coupled receptor	-1.12917	0.0418163	Under	3 hour	not assigned.annotated			!!!
	Prupe.4G248800	Prupe.4G248800.3	Prupe.4G248800.3.p		MATE efflux family protein	-8.64733	0.00479428	Under	3 hour	Solute transport.carrier-mediated transport.MOP superfamily.MATE family.metal-citrate complex transporter (FRD) / Nutrient uptake.iron uptake.long-distance iron transport.ferric-citrate complex transporter (FRD)			!!!
	Prupe.5G122100	Prupe.5G122100.2	Prupe.5G122100.2.p	ATSOS3,CBL4,SOS3	Calcium-binding EF-hand family protein	-2.78775	0.00158938	Under	3 hour	not assigned.annotated			!!!
	Prupe.6G328400	Prupe.6G328400.1	Prupe.6G328400.1.p		HSP20-like chaperones superfamily protein	-1.1596	0.00519954	Under	3 hour	not assigned.annotated			!!!
	Prupe.6G348800	Prupe.6G348800.9	Prupe.6G348800.9.p		RNA-binding ASCH domain protein	-7.66428	6.48759e-06	Under	3 hour	not assigned.not annotated			!!!
	Prupe.7G025800	Prupe.7G025800.1	Prupe.7G025800.1.p	FRS3	FAR1-related sequence 3	-7.82031	0.0245314	Under	3 hour	not assigned.annotated			!!!
	Prupe.7G036500	Prupe.7G036500.7	Prupe.7G036500.7.p		Peptide chain release factor 1	-1.05912	0.0283832	Under	3 hour	Protein biosynthesis.organelle machinery.translation termination.peptide chain release factor (PrfA)			!!!
	Prupe.7G145800	Prupe.7G145800.2	Prupe.7G145800.2.p	ATCOR413-PM2,COR413-PM2	cold-regulated 413-plasma membrane 2	-1.19493	0.0047911	Under	3 hour	not assigned.annotated			!!!
	Prupe.7G219300	Prupe.7G219300.2	Prupe.7G219300.2.p		Protein kinase family protein with leucine-rich repeat domain	-9.80855	0.00960979	Under	3 hour	not assigned.annotated			!!!
	Prupe.8G244400	Prupe.8G244400.1	Prupe.8G244400.1.p		Tudor/PWWP/MBT domain-containing protein	-1.18749	0.017341	Under	3 hour	RNA biosynthesis.transcriptional regulation.transcription factor (HUA2)			!!!
	Prupe.8G250900	Prupe.8G250900.5	Prupe.8G250900.5.p	ATSCC3,SCC3	sister-chromatid cohesion protein 3	-8.98084	0.00647416	Under	3 hour	Cell cycle organisation.mitosis and meiosis.sister chromatid separation.cohesin regulator complex.component SCC3			!!!
