# Supplementary material for: Transcriptomic Analysis on the Peel of UV-B-Exposed Peach Fruit Reveals an Upregulation of Phenolic- and UVR8-Related Pathways
Source: Plants (Basel). 2023 Apr 28;12(9):1818. doi: 10.3390/plants12091818 (PMC10180693; doi:10.3390/plants12091818)
Supplement: Supplementary file 1 [file plants-12-01818-s001.zip › Table S3.xlsx]

## Sheet: Foglio1
			Table S3: Differentially expressed genes divided in functional classes by MapMan analyses for P. Persica fruit peel exposed to UVB. Fold change (FC) of expression for each gene is shown for 1h and 3h recovery from UVB radiation
			MapMan BinCode	MapMan BinName	Transcript id	Description	UVB 1h logFC	UVB 3h logFC
			15.5.7.2	RNA biosynthesis.transcriptional regulation.AP2/ERF transcription factor superfamily.transcription factor (DREB)	prupe.5g090500.1	transcription factor (DREB)	4.84109	0	Transcription Factors
			15.5.7.2	RNA biosynthesis.transcriptional regulation.AP2/ERF transcription factor superfamily.transcription factor (DREB)	prupe.5g090200.1	transcription factor (DREB)	3.78022	0
			15.5.7.2	RNA biosynthesis.transcriptional regulation.AP2/ERF transcription factor superfamily.transcription factor (DREB)	prupe.5g090000.1	transcription factor (DREB)	3.65517	0
			15.5.7.2	RNA biosynthesis.transcriptional regulation.AP2/ERF transcription factor superfamily.transcription factor (DREB)	prupe.5g090100.1	transcription factor (DREB)	3.56282	2.34889
			15.5.7.2	RNA biosynthesis.transcriptional regulation.AP2/ERF transcription factor superfamily.transcription factor (DREB)	prupe.2g289500.1	transcription factor (DREB)	3.29664	0
			15.5.2.1	RNA biosynthesis.transcriptional regulation.MYB transcription factor superfamily.transcription factor (MYB)	prupe.3g017100.1	transcription factor (MYB)	2.274	0
			15.5.2.1	RNA biosynthesis.transcriptional regulation.MYB transcription factor superfamily.transcription factor (MYB)	prupe.3g006300.1	transcription factor (MYB)	1.86401	0
			15.5.7.1	RNA biosynthesis.transcriptional regulation.AP2/ERF transcription factor superfamily.transcription factor (ERF)	prupe.4g176200.1	transcription factor (ERF)	1.82566	0
			15.5.1.3	RNA biosynthesis.transcriptional regulation.C2C2 transcription factor superfamily.transcription factor (GATA)	prupe.2g212900.1	transcription factor (GATA)	1.81717	0
			15.5.7.2	RNA biosynthesis.transcriptional regulation.AP2/ERF transcription factor superfamily.transcription factor (DREB)	prupe.2g289600.1	transcription factor (DREB)	1.80964	0
			15.5.12	RNA biosynthesis.transcriptional regulation.transcription factor (GRAS)	prupe.4g200200.2	transcription factor (GRAS)	1.76847	0
			15.5.2.1	RNA biosynthesis.transcriptional regulation.MYB transcription factor superfamily.transcription factor (MYB)	prupe.1g323400.1	transcription factor (MYB)	1.7571	0
			15.5.12	RNA biosynthesis.transcriptional regulation.transcription factor (GRAS)	prupe.4g007500.1	transcription factor (GRAS)	1.70812	0
			15.5.2.1	RNA biosynthesis.transcriptional regulation.MYB transcription factor superfamily.transcription factor (MYB)	prupe.3g227800.1	transcription factor (MYB)	1.69737	0
			15.5.2.1	RNA biosynthesis.transcriptional regulation.MYB transcription factor superfamily.transcription factor (MYB)	prupe.3g163100.1	transcription factor (MYB)	1.64254	0
			15.5.32	RNA biosynthesis.transcriptional regulation.transcription factor (bHLH)	prupe.5g035400.1	transcription factor (bHLH)	1.63287	0
			15.5.2.3	RNA biosynthesis.transcriptional regulation.MYB transcription factor superfamily.transcription factor (GARP)	prupe.1g306300.1	G2-like GARP transcription factor	1.59936	0
			15.5.38	RNA biosynthesis.transcriptional regulation.transcription factor (DBP)	prupe.3g006100.1	transcription factor (DBP)	1.46525	0
			15.5.32	RNA biosynthesis.transcriptional regulation.transcription factor (bHLH)	prupe.2g136300.3	transcription factor (bHLH)	1.45768	0
			15.5.22	RNA biosynthesis.transcriptional regulation.transcription factor (WRKY)	prupe.1g393000.1	transcription factor (WRKY)	1.45633	0
			15.5.15	RNA biosynthesis.transcriptional regulation.transcription factor (C2H2-ZF)	prupe.1g424300.1	C2H2 zinc finger transcription factor	1.41595	0
			15.5.22	RNA biosynthesis.transcriptional regulation.transcription factor (WRKY)	prupe.1g459100.1	transcription factor (WRKY)	1.39272	0
			15.5.22	RNA biosynthesis.transcriptional regulation.transcription factor (WRKY)	prupe.2g185100.1	transcription factor (WRKY)	1.37017	0
			15.5.32	RNA biosynthesis.transcriptional regulation.transcription factor (bHLH)	prupe.2g190100.2	transcription factor (bHLH)	1.34516	0
			15.5.22	RNA biosynthesis.transcriptional regulation.transcription factor (WRKY)	prupe.1g071400.1	transcription factor (WRKY)	1.33275	0
			15.5.7.1	RNA biosynthesis.transcriptional regulation.AP2/ERF transcription factor superfamily.transcription factor (ERF)	prupe.4g051400.1	transcription factor (ERF)	1.27338	0
			15.5.17	RNA biosynthesis.transcriptional regulation.transcription factor (NAC)	prupe.4g279600.1	transcription factor (NAC)	1.22321	0
			15.5.13	RNA biosynthesis.transcriptional regulation.transcription factor (HSF)	prupe.3g108700.1	transcription factor (HSF)	1.185	0
			15.5.29	RNA biosynthesis.transcriptional regulation.transcription factor (JUMONJI)	prupe.5g028800.2	transcription factor (JUMONJI)	1.16144	0
			15.5.15	RNA biosynthesis.transcriptional regulation.transcription factor (C2H2-ZF)	prupe.2g230800.1	C2H2 zinc finger transcription factor	1.13279	0
			15.5.7.2	RNA biosynthesis.transcriptional regulation.AP2/ERF transcription factor superfamily.transcription factor (DREB)	prupe.3g157100.1	transcription factor (DREB)	1.11762	0
			15.5.5.3	RNA biosynthesis.transcriptional regulation.B3 transcription factor superfamily.transcription factor (RAV/NGATHA)	prupe.1g305900.1	transcription factor (RAV/NGATHA)	1.05038	0
			15.5.7.5	RNA biosynthesis.transcriptional regulation.AP2/ERF transcription factor superfamily.transcription factor (AP2-RAV)	prupe.1g305900.1	transcription factor (AP2-RAV)	1.05038	0
			15.5.7.1	RNA biosynthesis.transcriptional regulation.AP2/ERF transcription factor superfamily.transcription factor (ERF)	prupe.4g055500.1	transcription factor (ERF)	1.01831	0
			15.5.2.1	RNA biosynthesis.transcriptional regulation.MYB transcription factor superfamily.transcription factor (MYB)	prupe.8g270000.1	transcription factor (MYB)	0	2.73711
			15.5.4.1	RNA biosynthesis.transcriptional regulation.bZIP transcription factor superfamily.transcription factor (bZIP)	prupe.1g208500.2	transcription factor (bZIP)	0	2.01907
			15.5.4.1	RNA biosynthesis.transcriptional regulation.bZIP transcription factor superfamily.transcription factor (bZIP)	prupe.1g478400.1	transcription factor (bZIP)	0	1.48024
			15.5.4.6	RNA biosynthesis.transcriptional regulation.bZIP transcription factor superfamily.transcription factor (HY5)	prupe.1g208500.2	transcription factor (HY5)	0	2.01907
			15.5.4.6	RNA biosynthesis.transcriptional regulation.bZIP transcription factor superfamily.transcription factor (HY5)	prupe.1g478400.1	transcription factor (HY5)	0	1.48024
			15.5.2.1	RNA biosynthesis.transcriptional regulation.MYB transcription factor superfamily.transcription factor (MYB)	prupe.7g201600.1	transcription factor (MYB)	-1.25732	0
			15.5.1.1	RNA biosynthesis.transcriptional regulation.C2C2 transcription factor superfamily.transcription factor (BBX-DBB)	prupe.8g087900.1	transcription factor (BBX-DBB)	-1.28658	0
			15.5.37	RNA biosynthesis.transcriptional regulation.transcription factor (OFP)	prupe.6g290900.1	transcription factor (OFP)	-1.31686	0
			15.5.4.1	RNA biosynthesis.transcriptional regulation.bZIP transcription factor superfamily.transcription factor (bZIP)	prupe.5g211200.1	transcription factor (bZIP)	-1.3876	0
			15.5.2.1	RNA biosynthesis.transcriptional regulation.MYB transcription factor superfamily.transcription factor (MYB)	prupe.1g405400.1	transcription factor (MYB)	-1.53914	0
			15.5.37	RNA biosynthesis.transcriptional regulation.transcription factor (OFP)	prupe.7g098500.1	transcription factor (OFP)	-2.83627	0
			26.8.2.1	External stimuli response.pathogen.effector-triggered immunity (ETI) network.effector receptor (NLR)	prupe.2g057100.2	effector receptor (NLR)	10.6167	0	Esternal stimuli response
			26.4.3.4.2	External stimuli response.temperature.cold response.ICE-CBF cold acclimation transcriptional cascade.transcription factor (CBF/DREB1)	prupe.5g090500.1	transcription factor (CBF/DREB1)	4.84109	0
			26.4.3.4.2	External stimuli response.temperature.cold response.ICE-CBF cold acclimation transcriptional cascade.transcription factor (CBF/DREB1)	prupe.5g090200.1	transcription factor (CBF/DREB1)	3.78022	0
			26.4.3.4.2	External stimuli response.temperature.cold response.ICE-CBF cold acclimation transcriptional cascade.transcription factor (CBF/DREB1)	prupe.5g090000.1	transcription factor (CBF/DREB1)	3.65517	0
			26.4.3.4.2	External stimuli response.temperature.cold response.ICE-CBF cold acclimation transcriptional cascade.transcription factor (CBF/DREB1)	prupe.5g090100.1	transcription factor (CBF/DREB1)	3.56282	2.34889
			26.4.3.4.2	External stimuli response.temperature.cold response.ICE-CBF cold acclimation transcriptional cascade.transcription factor (CBF/DREB1)	prupe.2g289500.1	transcription factor (CBF/DREB1)	3.29664	0
			26.1.3.3	External stimuli response.light.UV-B light.regulatory protein (RUP)	prupe.2g293400.1	RUP UV-B-light perception regulator protein	2.59755	2.20579
			26.7.1	External stimuli response.damage.elicitor peptide precursor (proPEP)	prupe.1g339500.1	elicitor peptide precursor (proPEP)	1.97871	0
			26.8.2.1	External stimuli response.pathogen.effector-triggered immunity (ETI) network.effector receptor (NLR)	prupe.2g057800.1	effector receptor (NLR)	1.37489	0
			26.1.1.3.3.1	External stimuli response.light.red/far red light.CUL4-DDB1 ubiquitination complex.COP1-SPA substrate adaptor subcomplex.component COP1	prupe.4g013500.1	component COP1 of COP1-SPA light signal transduction ubiquitin E3 ligase complex	1.03205	1.12021
			26.1.3.2	External stimuli response.light.UV-B light.transcriptional regulator (HY5)	prupe.1g208500.2	UV-B signal transduction transcriptional regulator	0	2.01907
			26.1.3.2	External stimuli response.light.UV-B light.transcriptional regulator (HY5)	prupe.1g478400.1	UV-B signal transduction transcriptional regulator	0	1.48024
			21.2.2.1.1	Cell wall organisation.hemicellulose.xylan.biosynthesis.galacturonosyltransferase	prupe.3g276500.1	galacturonosyltransferase	1.76059	0	Cell wall
			21.2.2.1.1	Cell wall organisation.hemicellulose.xylan.biosynthesis.galacturonosyltransferase	prupe.1g384100.1	galacturonosyltransferase	1.36288	0
			21.2.2.2.2	Cell wall organisation.hemicellulose.xylan.modification and degradation.xylan O-acetyltransferase (XOAT)	prupe.3g123000.1	xylan O-acetyltransferase (XOAT)	1.21407	0
			21.3.1.2.1	Cell wall organisation.pectin.homogalacturonan.modification and degradation.pectin methylesterase	prupe.7g190400.1	pectin methylesterase	-1.44451	0
			21.3.2.2.3.2	Cell wall organisation.pectin.rhamnogalacturonan I.modification and degradation.alpha-L-arabinofuranosidase activities.bifunctional alpha-L-arabinofuranosidase and beta-D-xylosidase (BXL)	prupe.1g123100.1	bifunctional alpha-L-arabinofuranosidase and beta-D-xylosidase (BXL)	1.63705	0
			21.6.1.3	Cell wall organisation.lignin.monolignol biosynthesis.caffeoyl shikimate esterase (CSE)	prupe.5g109300.1	caffeoyl shikimate esterase (CSE)	1.10652	0
